# Supplementary material for: Central zinc metal-controlled regioselective meso-bromination of zincated β-silylporphyrins—rapid access to meso,β-dual-functionalized porphyrins
Source: Royal Society of Chemistry journal article supplement (doi:10.1039/d0ob02262d), 2020-01-01

## Supplementary Data for Central zinc metal-controlled regioselective *meso*-bromination of zincated $\beta$ -silylporphyrins—rapid access to *meso*, $\beta$ -dual-functionalized porphyrins

Satoshi Hayashi, Rina Takamatsu, Shiori, Takeda, Masahiro Noji,\* and Toshikatsu Takanami\*

Meiji Pharmaceutical University, 2-522-1 Noshio, Kiyose, Tokyo 204-8588, Japan

mnoji@my-pharm.ac.jp, takanami@my-pharm.ac.jp

### Table of Contents

|                                                                                                                        |     |
|------------------------------------------------------------------------------------------------------------------------|-----|
| 1. General methods                                                                                                     | S1  |
| 2. Synthesis of precursors of <b>Zn-1c</b> and <b>2H-1c</b>                                                            | S2  |
| 3. General procedure for the preparation of $\beta$ -silylporphyrins ( <b>GP-Si</b> )                                  | S3  |
| 4. General procedure for the preparation of zincated porphyrins ( <b>GP-Zn</b> )                                       | S5  |
| 5. General procedure for the bromination of free-base porphyrins <b>2H-1</b> with NBS ( <b>GP-NBS-2H-1</b> ) (Table 1) | S6  |
| 6. General procedure for the bromination of zincated porphyrin <b>Zn-1</b> with NBS ( <b>GP-NBS-Zn-1</b> ) (Table 1)   | S8  |
| 7. General procedure for the bromination of <b>2H-1a</b> (Table 2, other than NBS)                                     | S11 |
| 8. General procedure for the bromination of <b>Zn-1a</b> (Table 2, other than NBS, NCS)                                | S11 |
| 9. Determination of the structure of <b>Zn-3a</b>                                                                      | S12 |
| 10. X-ray crystal structure of <b>Zn-3c</b>                                                                            | S13 |
| 11. Functionalization of <b>Zn-3a</b>                                                                                  | S14 |
| 12. References                                                                                                         | S15 |
| 13. NMR Spectra                                                                                                        | S16 |

### 1. General methods

The  $^1\text{H}$  and  $^{13}\text{C}$  NMR spectra were recorded at the room temperature on a JEOL JNM AL-300, a JEOL JNM AL-400, a JEOL JNM ECS-400, a JEOL JNM LA-500, and a JEOL JNM ECZ-500 spectrometer using perdeuterated solvents as internal standards. The chemical shifts of the  $^1\text{H}$  and  $^{13}\text{C}\{^1\text{H}\}$  spectra are given in ppm relative to the residual protiated solvent and relative to the solvent  $\text{CHCl}_3$  ( $\delta = 7.24$ )  $^1\text{H}$  NMR and relative to the central resonance of  $\text{CDCl}_3$  ( $\delta = 77.0$ ) for  $^{13}\text{C}\{^1\text{H}\}$  NMR. Using benzotrifluoride as an external standard, the  $^{19}\text{F}$  NMR spectra were recorded at room temperature on a JEOL JNM ECS-400 spectrometer. The chemical shift values are expressed as  $\delta$  values (ppm), and coupling constant values ( $J$ ) are given in hertz (Hz). The following abbreviations were used for signal multiplicities: s, singlet; d, doublet; t, triplet; q, quartet; m, multiplet; and br, broad. The UV-visible spectra were recorded on a JASCO V-660 dual-beam grating spectrophotometer with a 1-cm quartz cell. The IR spectra were recorded on a JASCO FT/IR-4100 spectrophotometer. The mass spectroscopic data were obtained on JEOL JMS-700, JMS-T100LC spectrometer. The melting point data were not available for the obtained porphyrin derivatives owing to their infusibility below 300 °C. Chromatographic purifications were conducted on silica gel (63–210  $\mu\text{m}$ , spherical, neutral).

The brominations were conducted in air without establishing anhydrous conditions. Reactions involving moisture sensitive reagents were conducted under an argon atmosphere using standard vacuum line techniques and a glassware that was flame-dried and cooled under argon before use. Dry tetrahydrofuran (THF) and dry dioxane were purchased for the reactions and used without further desiccation. According to the method described in the literature, porphyrin derivatives **2H-1a**, **2H-1b**, **2H-1e**, **Zn-1a**, **2H-2a**, and **2H-2b**<sup>1</sup> were prepared. Other chemicals were purchased from commercial sources and used as received unless stated otherwise.

## 2. Synthesis of precursors of Zn-1c and 2H-1c

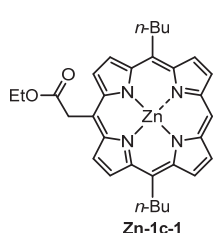

**[5,15-Di-*n*-butyl-10-ethoxycarbonylmethylporphyrinato]zinc(II) (Zn-1c-1)** Prepared from 10-bromo-5,15-di-*n*-butylporphyrin according to the method described in the literature.<sup>2</sup> Dark purple solid (286 mg, 84%):  $R_f = 0.52$  (silica gel, *n*-hexane/EtOAc = 3:1); <sup>1</sup>H-NMR (CDCl<sub>3</sub>, 300 MHz)  $\delta$ : 9.86 (1H, s), 9.53 (2H, d,  $J = 4.9$  Hz), 9.51 (2H, d,  $J = 4.9$  Hz), 9.50 (2H, d,  $J = 4.6$  Hz), 9.24 (2H, d,  $J = 4.6$  Hz), 5.99 (2H, s), 4.96 (4H, t,  $J = 8.0$  Hz), 4.16 (2H, q,  $J = 7.1$  Hz), 2.54–2.44 (4H, m), 1.84–1.79 (4H, m), 1.13 (3H, t,  $J = 7.1$  Hz), 1.12 (6H, t,  $J = 7.4$  Hz); <sup>13</sup>C-NMR (CDCl<sub>3</sub>, THF-

*d*<sub>8</sub>, 125 MHz)  $\delta$ : 173.1, 150.0 (2C), 149.7 (2C), 149.1 (2C), 148.8 (2C), 131.5 (2C), 129.0 (2C), 128.94 (2C), 128.85 (2C), 119.4 (2C), 109.3, 104.4, 60.8, 41.2 (2C), 41.1, 35.2 (2C), 23.6 (2C), 14.14 (2C), 14.07; IR (KBr): 2955, 2856, 1730, 1320, 1174, 1069, 994, 959, 778, cm<sup>-1</sup>; UV/vis (CH<sub>2</sub>Cl<sub>2</sub>)  $\lambda_{max}$  (log  $\epsilon$ ): 414 (5.7), 546 (4.3), 584 (3.6) nm; EI-MS (70 eV)  $m/z$  (relative intensity): 570 (M<sup>+</sup>, 100), 527 (53, M – C<sub>3</sub>H<sub>7</sub>), 497 (24, M – CO<sub>2</sub>C<sub>2</sub>H<sub>5</sub>), 454 (11, M – C<sub>3</sub>H<sub>7</sub>, CO<sub>2</sub>C<sub>2</sub>H<sub>5</sub>), 411 (20, M – 2C<sub>3</sub>H<sub>7</sub>, CO<sub>2</sub>C<sub>2</sub>H<sub>5</sub>); HRMS (EI)  $m/z$ : calcd for C<sub>32</sub>H<sub>34</sub>N<sub>4</sub>O<sub>2</sub>Zn: 570.1973, found 570.1974; Anal. calcd for C<sub>32</sub>H<sub>34</sub>N<sub>4</sub>O<sub>2</sub>Zn: C, 67.19; H, 5.99; N, 9.79, found: C, 67.05; H, 5.91; N, 9.74.

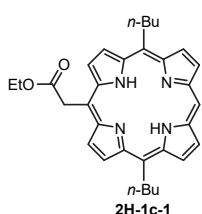

**5,15-Di-*n*-butyl-10-ethoxycarbonylmethylporphyrin (2H-1c-1)**<sup>1</sup> To a solution of **Zn-1c-1** (0.25 mmol) in THF (5 mL) was added a mixed solution of conc. HCl aq. (0.1 mL) and THF (0.9 mL) at room temperature, and the whole was stirred for 20 min at room temperature. The mixture was diluted with THF/Et<sub>2</sub>O (2:1, 25 mL), neutralized with aqueous sat. NaHCO<sub>3</sub>. The combined organic layer was washed successively with water and sat. NaCl, dried over MgSO<sub>4</sub>, and filtered. The filtrate was concentrated under reduced pressure. The crude product was recrystallized from MeOH/CH<sub>2</sub>Cl<sub>2</sub> to give **2H-**

**1c-1** as a dark red-purple solid (121 mg, 97%):  $R_f = 0.49$  (silica gel, *n*-hexane/EtOAc = 3:1); <sup>1</sup>H-NMR (CDCl<sub>3</sub>, 500 MHz)  $\delta$ : 9.94 (1H, s), 9.58 (2H, d,  $J = 4.9$  Hz), 9.51 (2H, d,  $J = 4.9$  Hz), 9.46 (2H, d,  $J = 4.6$  Hz), 9.26 (2H, d,  $J = 4.6$  Hz), 6.01 (2H, s), 4.93 (4H, t,  $J = 8.1$  Hz), 4.19 (2H, q,  $J = 7.0$  Hz), 2.53–2.46 (4H, m), 1.84–1.79 (4H, m), 1.15 (3H, t,  $J = 7.0$  Hz), 1.13 (6H, t,  $J = 7.3$  Hz), –2.98 (2H, br s); <sup>13</sup>C-NMR (CDCl<sub>3</sub>, 125 MHz)  $\delta$ : 172.7, 147.2 (2C, br), 147.0 (2C, br), 145.6 (2C, br), 145.0 (2C, br), 131.7 (2C), 129.1 (2C), 128.4 (2C), 128.3 (2C), 119.2 (2C), 109.2, 104.1, 61.4, 41.5, 40.9 (2C), 34.9 (2C), 23.7 (2C), 14.3 (2C), 14.2; IR (KBr): 3303, 2955, 2859, 1733, 1470, 1243, 1160, 916, 838, 778, 727 cm<sup>-1</sup>; UV/vis (CH<sub>2</sub>Cl<sub>2</sub>)  $\lambda_{max}$  (log  $\epsilon$ ): 411 (5.6), 511 (4.2), 544 (3.6), 589 (3.7), 645 (3.5) nm; FAB-MS (dithiothreitol/thioglycerol = 1:1)  $m/z$  509 [M+H]<sup>+</sup>; HRMS-FAB<sup>+</sup> ([M+H]<sup>+</sup>): calcd for C<sub>32</sub>H<sub>37</sub>N<sub>4</sub>O<sub>2</sub>: 509.2917, found

509.2918; Anal. calcd for C<sub>32</sub>H<sub>36</sub>N<sub>4</sub>O<sub>2</sub>: C, 75.56; H, 7.13; N, 11.01, found: C, 75.45; H, 6.98; N, 10.98.

### 3. General procedure for the preparation of $\beta$ -silylporphyrins (GP-Si)<sup>1</sup>

An oven-dried 30-mL two-necked flask equipped with a magnetic stirring bar and rubber septum was charged using porphyrin **1** (400  $\mu$ mol), [Ir(cod)OMe]<sub>2</sub> (13.2 mg, 20  $\mu$ mol, 5 mol%), and 4,4'-di-*tert*-butyl-2,2'-bipyridyl (10.7 mg, 40  $\mu$ mol, 10 mol%). The reaction vessel was evacuated and flushed using argon (three times), and then dry dioxane (5 mL) and 1,1,1,3,5,5,5-heptamethyltrisiloxane (540  $\mu$ L, 2 mmol, 5 equiv) were added. The mixture was stirred at 95 °C for 24 h, and the solvent was evaporated to dryness. The crude product was purified using silica gel column chromatography (*n*-hexane/EtOAc = 3:1) and then recrystallized using MeOH/CH<sub>2</sub>Cl<sub>2</sub>, yielding  $\beta$ -silylporphyrin **1**.

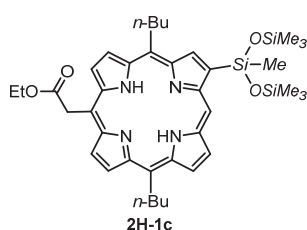

#### 5,15-Di-*n*-butyl-10-ethoxycarbonylmethyl-2-(1,1,1,3,5,5,5-heptamethyltrisiloxan-3-yl)porphyrin (**2H-1c**)

The  $\beta$ -silylation of **2H-1c-1** was carried out according to GP-Si. Dark red-purple solid (187 mg, 65%):  $R_f$  = 0.66 (silica gel, *n*-hexane/EtOAc = 3:1); <sup>1</sup>H-NMR (CDCl<sub>3</sub>, 300 MHz)  $\delta$ : 10.26 (1H, s), 9.68 (1H, s), 9.60 (1H, d,  $J$  = 4.9 Hz), 9.59 (1H, d,  $J$  = 4.9 Hz), 9.54 (1H, d,  $J$  = 4.9 Hz), 9.53 (1H, d,  $J$  = 4.9 Hz), 9.49 (1H, d,  $J$  = 4.8 Hz), 9.27 (1H, d,  $J$  = 4.8 Hz), 6.02 (2H, s), 5.00–4.94 (4H, m), 4.17 (2H, q,  $J$  = 7.1 Hz), 2.53–2.48 (4H, m), 1.84–1.79 (4H, m), 1.14 (3H, t,  $J$  = 7.3 Hz), 1.13 (3H, t,  $J$  = 7.1 Hz), 1.12 (3H, t,  $J$  = 7.3 Hz), 0.91 (3H, s), 0.28 (18H, s), –2.86 (2H, br s); <sup>13</sup>C-NMR (CDCl<sub>3</sub>, 125 MHz)  $\delta$ : 172.9, 148.2 (br), 147.4 (br), 146.2 (br), 145.9 (br), 145.0 (br), 143.2 (br), 141.8 (br), 140.9 (br), 137.2, 132.5, 129.6, 129.0, 128.9, 128.8, 128.7, 128.2, 119.2, 119.0, 109.2, 106.0, 61.5, 41.6, 41.2, 41.0, 35.1, 35.0, 23.94, 23.90, 14.44 (2C), 14.39, 2.8, 2.4 (6C); IR (KBr): 3307, 2956, 1739, 1325, 1254, 1177, 1068, 842, 785, 733 cm<sup>-1</sup>; UV/vis (CH<sub>2</sub>Cl<sub>2</sub>)  $\lambda_{max}$  (log  $\epsilon$ ): 414 (5.6), 514 (4.2), 550 (3.6), 592 (3.7), 649 (3.5) nm; FAB-MS (dithiothreitol/thioglycerol = 1:1)  $m/z$  729 [M+H]<sup>+</sup>; HRMS-FAB<sup>+</sup> ([M+H]<sup>+</sup>): calcd for C<sub>39</sub>H<sub>57</sub>N<sub>4</sub>O<sub>4</sub>Si<sub>3</sub>: 729.3688, found 729.3688; Anal. calcd for C<sub>39</sub>H<sub>56</sub>N<sub>4</sub>O<sub>4</sub>Si<sub>3</sub>: C, 64.24; H, 7.74; N, 7.68, found: C, 64.25; H, 7.44; N, 7.65.

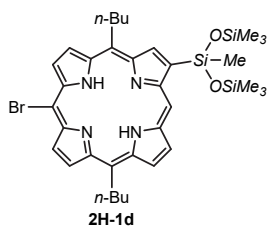

#### 10-Bromo-5,15-di-*n*-butyl-2-(1,1,1,3,5,5,5-heptamethyltrisiloxan-3-yl)porphyrin (**2H-1d**)

The  $\beta$ -silylation of 10-bromo-5,15-di-*n*-butylporphyrin<sup>2</sup> was carried out according to GP-Si. The crude product was purified by silica gel column chromatography (*n*-hexane/CHCl<sub>3</sub> = 2:1). Dark purple solid (164 mg, 91%):  $R_f$  = 0.60 (CHCl<sub>3</sub>/*n*-hexane = 1:2); <sup>1</sup>H-NMR (CDCl<sub>3</sub>, 400 MHz)  $\delta$ : 10.33 (1H, s), 9.69 (1H, s), 9.68 (1H, d,  $J$  = 4.9 Hz), 9.65 (1H, d,  $J$  = 4.9 Hz), 9.40 (1H, d,  $J$  = 4.9 Hz), 9.38 (1H, d,  $J$  = 4.9 Hz), 9.30 (1H, d,  $J$  = 4.9 Hz), 9.28 (1H, d,  $J$  = 4.9 Hz), 4.90 (2H, t,  $J$  = 8.0 Hz), 4.74 (2H, t,  $J$  = 8.0 Hz), 2.54–2.47 (2H, m), 2.46–2.38 (2H, m), 1.85–1.81 (2H, m), 1.78–1.74 (2H, m), 1.17 (3H, t,  $J$  = 7.3 Hz), 1.11 (3H, t,  $J$  = 7.3 Hz), 0.98 (3H, s), 0.35 (18H, s), –2.97 (2H, br s); <sup>13</sup>C-NMR (CDCl<sub>3</sub>, 100 MHz)  $\delta$ : 148.6 (br), 148.5 (br), 147.8 (br), 146.4 (br), 146.3 (br), 146.0 (br), 145.7 (br), 143.4 (br), 142.1, 137.2, 133.3, 132.7, 132.5, 129.0, 128.7, 128.1, 119.8, 119.6, 106.4, 102.6, 41.0, 40.7, 34.8, 34.6, 23.74, 23.65, 14.3, 14.2, 2.7, 2.3 (6C); IR (KBr): 3306, 2955, 1258, 1062, 979, 842, 780, 754, 733 cm<sup>-1</sup>; UV/vis (CH<sub>2</sub>Cl<sub>2</sub>)  $\lambda_{max}$  (log  $\epsilon$ ): 416 (5.8), 517 (4.4), 550

(3.9), 595 (3.8), 651 (3.7) nm; FAB-MS (dithiothreitol/thioglycerol = 1:1)  $m/z$  723 [M+2H]<sup>+</sup>, 721 [M+H]<sup>+</sup>; HRMS-FAB<sup>+</sup> ([M+H]<sup>+</sup>): calcd for C<sub>35</sub>H<sub>50</sub>BrN<sub>4</sub>O<sub>2</sub>Si<sub>3</sub>: 721.2425, found 721.2432; Anal. calcd for C<sub>35</sub>H<sub>49</sub>BrN<sub>4</sub>O<sub>2</sub>Si<sub>3</sub>: C, 58.23; H, 6.84; N, 7.76, found: C, 58.40; H, 6.74; N, 7.75.

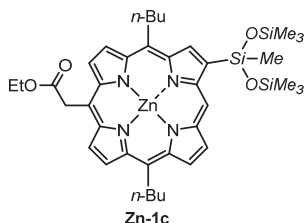

**[5,15-Di-*n*-butyl-10-ethoxycarbonylmethyl-2-(1,1,1,3,5,5,5-heptamethyltrisiloxan-3-yl)porphyrinato]zinc(II) (Zn-1c)** The  $\beta$ -silylation of **Zn-1c-1** was conducted according to **GP-Si**. Dark purple solid (271 mg, 98%):  $R_f$  = 0.63 (silica gel, *n*-hexane/EtOAc = 3:1);

<sup>1</sup>H-NMR (CDCl<sub>3</sub>, 400 MHz)  $\delta$ : 10.27 (1H, s), 9.75 (1H, s), 9.32 (1H, d,  $J$  = 4.6 Hz), 9.26 (1H, d,  $J$  = 4.6 Hz), 8.94 (1H, d,  $J$  = 4.8 Hz), 8.79 (1H, d,  $J$  = 4.8 Hz), 8.71 (1H, d,  $J$  = 4.9

Hz), 8.65 (1H, d,  $J$  = 4.9 Hz), 5.13 (2H, s), 4.69 (2H, t,  $J$  = 8.1 Hz), 4.38 (2H, t,  $J$  = 8.1 Hz), 3.98 (2H, q,  $J$  = 7.1 Hz), 2.47–2.39 (2H, m), 2.30–2.22 (2H, m), 1.86–1.83 (2H, m), 1.75–1.71 (2H, m), 1.18 (3H, t,  $J$  = 7.5 Hz), 1.09 (3H, t,  $J$  = 7.5 Hz), 1.06 (3H, s), 1.05 (3H, t,  $J$  = 7.1 Hz), 0.40 (18H, s); <sup>13</sup>C-NMR (CDCl<sub>3</sub>, 125 MHz)  $\delta$ : 172.7, 152.2, 149.6, 149.2, 148.9, 148.8, 148.6, 148.1, 148.0, 141.8, 138.4, 131.8, 128.8, 128.3, 128.2, 128.11, 128.06, 119.1 (2C), 108.6, 106.6, 60.9, 41.1, 40.8, 40.1, 35.1, 34.7, 23.8, 23.7, 14.22, 14.18, 14.06, 2.9, 2.3 (6C); IR (KBr): 2955, 2859, 1733, 1254, 1150, 1059, 845, 774, 754, 733 cm<sup>-1</sup>; UV/vis (CH<sub>2</sub>Cl<sub>2</sub>)  $\lambda_{max}$  (log  $\epsilon$ ): 417 (6.0), 549 (4.7), 591 (4.1) nm; FAB-MS (*m*-nitrobenzylalcohol)  $m/z$  790 [M]<sup>+</sup>; HRMS-FAB<sup>+</sup> (M<sup>+</sup>): calcd for C<sub>39</sub>H<sub>54</sub>N<sub>4</sub>O<sub>4</sub>Si<sub>3</sub>Zn: 790.2744, found 790.2750; Anal. calcd for C<sub>39</sub>H<sub>54</sub>N<sub>4</sub>O<sub>4</sub>Si<sub>3</sub>Zn: C, 59.11; H, 6.87; N, 7.07, found: C, 59.25; H, 6.63; N, 7.06.

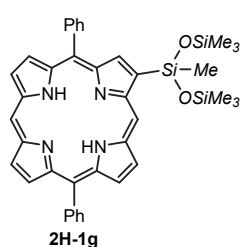

**2-(1,1,1,3,5,5,5-Heptamethyltrisiloxan-3-yl)-5,15-diphenylporphyrin (2H-1g)** The  $\beta$ -silylation of 5,15-diphenylporphyrin<sup>3</sup> was conducted according to **GP-Si** using 1,1,1,3,5,5,5-heptamethyltrisiloxane (108.1  $\mu$ L, 0.40 mmol, 1 equiv) at 95 °C for 5 h. The crude product was purified by silica gel column chromatography (*n*-hexane/CH<sub>2</sub>Cl<sub>2</sub> = 2:1). Dark red-purple solid (142 mg, 24%):  $R_f$  = 0.23 (1/2 CH<sub>2</sub>Cl<sub>2</sub>/hexane); <sup>1</sup>H-NMR (CDCl<sub>3</sub>, 300 MHz)  $\delta$ : 10.61 (1H, s),

10.28 (1H, s), 9.38 (2H, d,  $J$  = 4.6 Hz), 9.36 (1H, d,  $J$  = 4.6 Hz), 9.24 (1H, s), 9.08 (1H, d,  $J$  =

4.6 Hz), 9.07 (2H, d,  $J$  = 4.6 Hz), 8.29–8.26 (4H, m), 7.82–7.79 (6H, m), 0.86 (3H, s), 0.24 (18H, s), –3.07 (2H, br s); <sup>13</sup>C-NMR (CDCl<sub>3</sub>, 100 MHz)  $\delta$ : 148.3, 148.1, 147.9, 146.32, 146.26, 146.23, 145.8, 144.4, 141.9, 141.6 (2C), 134.0, 135.0 (2C), 134.9 (2C), 132.3, 132.0, 131.5, 131.4, 131.2, 130.7, 127.79, 127.76, 127.1 (2C), 127.0 (2C), 119.0, 118.9, 107.0, 105.2, 2.6, 2.2 (6C); IR (KBr): 3282, 2957, 1260, 1065, 958, 839, 787, 743, 721 cm<sup>-1</sup>; UV/vis (CH<sub>2</sub>Cl<sub>2</sub>)  $\lambda_{max}$  (log  $\epsilon$ ): 409 (5.6), 505 (4.3), 541 (3.7), 578 (3.8) nm; FAB-MS (dithiothreitol/thioglycerol = 1:1)  $m/z$  683 [M+H]<sup>+</sup>; HRMS-FAB<sup>+</sup> ([M+H]<sup>+</sup>): calcd for C<sub>39</sub>H<sub>43</sub>N<sub>4</sub>O<sub>2</sub>Si<sub>3</sub>: 683.2694, found 683.2689.

#### 4. General procedure for the preparation of zincated porphyrins (GP-Zn)<sup>4</sup>

A solution of free-base porphyrin **2H-1** (0.1 mmol) and Zn(OAc)<sub>2</sub>·2H<sub>2</sub>O in CHCl<sub>3</sub>/MeOH (30 mL/10 mL) was stirred for 10 min at room temperature. The mixture was diluted with Et<sub>2</sub>O (50 mL) and washed successively using water and brine. The organic layer was dried over MgSO<sub>4</sub> and filtered, and the filtrate was concentrated under reduced pressure. The residue was washed successively using *n*-hexane and MeOH, yielding zincated porphyrin **Zn-1**.

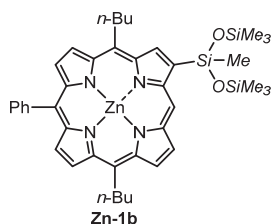

#### [5,15-Di-*n*-butyl-2-(1,1,1,3,5,5,5-heptamethyltrisiloxan-3-yl)-10-phenylporphyrinato]zinc(II) (**Zn-1b**)

The zincation of **2H-1b** was carried out according to **GP-Zn**. Purple crystal (203 mg, 99%): *R*<sub>f</sub> = 0.54 (silica gel, *n*-hexane/toluene = 1:1); <sup>1</sup>H-NMR (CDCl<sub>3</sub>, 400 MHz) δ: 10.36 (1H, s), 9.89 (1H, s), 9.54 (1H, d, *J* = 4.8 Hz), 9.53 (1H, d, *J* = 4.8 Hz), 9.43 (1H, d, *J* = 4.8 Hz), 9.35 (1H, d, *J* = 4.8 Hz), 8.95 (1H, d, *J* = 4.6 Hz), 8.91 (1H, d, *J* = 4.6 Hz), 8.19–8.17 (2H, m), 7.79–7.73 (3H, m), 5.07 (2H, t, *J* = 8.1 Hz),

4.85 (2H, t, *J* = 8.1 Hz), 2.65–2.57 (2H, m), 2.54–2.46 (2H, m), 1.95–1.87 (2H, m), 1.85–1.78 (2H, m), 1.19 (3H, t, *J* = 7.2 Hz), 1.13 (3H, t, *J* = 7.2 Hz), 0.99 (3H, s), 0.34 (18H, s); <sup>13</sup>C-NMR (CDCl<sub>3</sub>, 100 MHz) δ: 152.6, 150.28, 150.26, 150.23, 149.9, 149.00, 148.98, 148.95, 143.28, 142.31, 138.7, 134.5 (2C), 132.2, 132.14 (2C), 132.12, 129.2, 128.6, 127.4, 126.5 (2C), 120.10, 120.07, 120.03, 106.7, 41.3, 41.1, 35.5, 35.2, 24.0, 23.9, 14.4, 14.3, 2.9, 2.3 (6C); IR (KBr): 2956, 2850, 1441, 1258, 1062, 1005, 936, 843, 782, 756, 717, 701 cm<sup>-1</sup>; UV/vis (CH<sub>2</sub>Cl<sub>2</sub>) λ<sub>max</sub> (log ε): 416 (5.7), 547 (4.3), 580 (3.5) nm; FAB-MS (*m*-nitrobenzylalcohol) *m/z* 780 [M<sup>+</sup>]; HRMS-FAB<sup>+</sup> (M<sup>+</sup>): calcd for C<sub>41</sub>H<sub>52</sub>N<sub>4</sub>O<sub>2</sub>Si<sub>3</sub>Zn: 780.2690, found 780.2692.

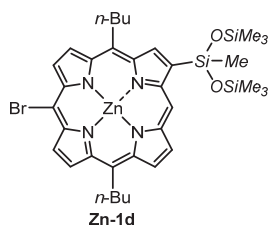

#### [10-Bromo-5,15-di-*n*-butyl-2-(1,1,1,3,5,5,5-heptamethyltrisiloxan-3-yl)porphyrinato]zinc(II) (**Zn-1d**)

The zincation of **2H-1d** was carried out according to **GP-Zn**. Dark purple crystal (106 mg, 98%): *R*<sub>f</sub> = 0.60 (silica gel, *n*-hexane/toluene = 1:1); <sup>1</sup>H-NMR (CDCl<sub>3</sub>, 400 MHz) δ: 10.19 (1H, s), 9.67 (1H, s), 9.10 (1H, d, *J* = 4.4 Hz), 9.03 (1H, d, *J* = 4.9 Hz), 8.96 (1H, d, *J* = 4.4 Hz), 8.83 (1H, d, *J* = 4.9 Hz), 8.79 (1H, d, *J* = 4.9 Hz), 8.34 (1H, d, *J* = 4.4 Hz), 4.56 (2H, t, *J* = 8.0 Hz), 3.85 (2H, t, *J* = 8.0 Hz), 2.44–2.36 (2H, m),

2.08–2.00 (2H, m), 1.85–1.81 (2H, m), 1.62–1.58 (2H, m), 1.17 (3H, t, *J* = 7.3 Hz), 1.08 (3H, s), 1.01 (3H, t, *J* = 7.3 Hz), 0.40 (18H, s); <sup>13</sup>C-NMR (CDCl<sub>3</sub>, 100 MHz) δ: 152.6, 149.52, 149.51, 149.08, 149.06, 148.9, 147.3, 147.2, 142.3, 138.7, 132.2, 132.0, 131.8, 128.8, 128.6, 128.1, 119.9, 119.5, 107.2, 103.1, 41.3, 40.7, 35.0, 34.2, 23.9, 23.7, 14.3, 14.2, 3.1, 2.4 (6C); IR (KBr): 2957, 2858, 1257, 1063, 1006, 839, 777, 755, 733 cm<sup>-1</sup>; UV/vis (CH<sub>2</sub>Cl<sub>2</sub>) λ<sub>max</sub> (log ε): 419 (5.9), 551 (4.4), 593 (3.7) nm; FAB-MS (*m*-nitrobenzylalcohol) *m/z* 784 [M+2], 782 [M]<sup>+</sup>; HRMS-FAB<sup>+</sup> (M<sup>+</sup>): calcd for C<sub>35</sub>H<sub>47</sub>BrN<sub>4</sub>O<sub>2</sub>Si<sub>3</sub>Zn: 782.1482, found 782.1481.

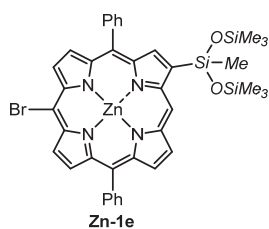

**[10-Bromo-2-(1,1,1,3,5,5,5-heptamethyltrisiloxan-3-yl)-5,15-diphenylporphyrinato]zinc(II) (Zn-1e)**

The zincation of **2H-1e** was carried out according to **GP-Zn**. Dark red-purple crystal (53.0 mg, 98%):  $R_f = 0.34$  (silica gel, *n*-hexane/toluene = 1:1);  $^1\text{H-NMR}$  ( $\text{CDCl}_3$ , 400 MHz)  $\delta$ : 10.51 (1H, s), 9.75 (1H, d,  $J = 4.4$  Hz), 9.74 (1H, d,  $J = 4.4$  Hz), 9.35 (1H, d,  $J = 4.4$  Hz), 9.20 (1H, s), 9.04 (1H, d,  $J = 4.4$  Hz), 9.03 (1H, d,  $J = 4.4$  Hz), 8.99 (1H, d,  $J = 4.4$  Hz), 8.21–8.19 (4H, m), 7.82–7.75 (6H, m), 0.82 (3H, s), 0.23 (18H, s);  $^{13}\text{C-NMR}$  ( $\text{CDCl}_3$ , 100 MHz)  $\delta$ : 154.0, 150.8, 150.7, 150.6, 150.3, 150.1, 149.44, 149.35, 143.0, 142.43, 142.39, 142.37, 134.7 (2C), 134.6 (2C), 133.17, 133.15, 132.96, 132.95, 132.93, 132.4, 127.72, 127.70, 126.8 (2C), 126.7 (2C), 121.2, 121.0, 108.4, 104.8, 2.7, 2.2 (6C); IR (KBr): 2956, 1259, 1060, 1003, 843, 789, 753, 733, 701  $\text{cm}^{-1}$ ; UV/vis ( $\text{CH}_2\text{Cl}_2$ )  $\lambda_{\text{max}}$  (log  $\epsilon$ ): 418 (5.9), 547 (4.5), 585 (3.5) nm; FAB-MS (*m*-nitrobenzylalcohol)  $m/z$  824 [ $\text{M}+2$ ], 822 [ $\text{M}$ ] $^+$ ; HRMS-FAB $^+$  ( $\text{M}^+$ ): calcd for  $\text{C}_{39}\text{H}_{39}\text{BrN}_4\text{O}_2\text{Si}_3\text{Zn}$ : 822.0856, found 822.0863.

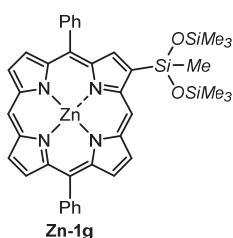

**[2-(1,1,1,3,5,5,5-Heptamethyltrisiloxan-3-yl)-5,15-diphenylporphyrinato]zinc(II) (Zn-1g)**

The zincation of **2H-1g** was carried out according to **GP-Zn**. Dark red-purple crystal (108 mg, 99%):  $R_f = 0.43$  (silica gel, *n*-hexane/toluene = 1:1);  $^1\text{H-NMR}$  ( $\text{CDCl}_3$ , 300 MHz)  $\delta$ : 10.64 (1H, s), 10.15 (1H, s), 9.45 (1H, d,  $J = 4.6$  Hz), 9.33 (1H, d,  $J = 4.6$  Hz), 9.32 (1H, d,  $J = 4.6$  Hz), 9.32 (1H, s), 9.15 (1H, d,  $J = 4.6$  Hz), 9.11 (1H, d,  $J = 4.6$  Hz), 9.07 (1H, d,  $J = 4.6$  Hz), 8.28–8.23 (4H, m), 7.82–7.78 (6H, m), 0.87 (3H, s), 0.26 (18H, s);  $^{13}\text{C-NMR}$  ( $\text{CDCl}_3$ , 100 MHz)  $\delta$ : 153.1, 150.3, 150.2, 150.1, 149.8, 149.51, 149.49, 149.44, 142.71, 142.67, 142.4, 141.9, 134.8 (2C), 134.7 (2C), 132.51, 132.50, 132.47, 132.0, 131.74, 131.71, 127.56, 127.54, 126.8 (2C), 126.7 (2C), 120.0, 119.9, 108.1, 106.0, 2.8, 2.2 (6C); IR (KBr): 2955, 1252, 1034, 995, 845, 786, 751, 700  $\text{cm}^{-1}$ ; UV/vis ( $\text{CH}_2\text{Cl}_2$ )  $\lambda_{\text{max}}$  (log  $\epsilon$ ): 410 (6.1), 538 (4.7), 575 (3.8) nm; EI-MS (70 eV)  $m/z$  (relative intensity): 744 (100,  $\text{M}^+$ ), 729 (6,  $\text{M} - \text{CH}_3$ ); HRMS (EI)  $m/z$ : calcd for  $\text{C}_{39}\text{H}_{40}\text{N}_4\text{O}_2\text{Si}_3\text{Zn}$ : 744.1751, found 744.1752.

## 5. General procedure for the bromination of free-base porphyrins **2H-1** with NBS (**GP-NBS-2H-1**)<sup>1</sup> (Table 1)

A solution of NBS (19.6 mg, 110  $\mu\text{mol}$ , 1.1 equiv) in  $\text{CHCl}_3$  (10 mL) was added to a solution of free-base  $\beta$ -silylporphyrin **2H-1** (100  $\mu\text{mol}$ ) in  $\text{CHCl}_3$  (10 mL) over 10 min at 0  $^\circ\text{C}$ . The reaction mixture was allowed to warm to room temperature while being stirred for 30 min, solvent was evaporated to dryness, and crude product was purified by silica gel column chromatography (*n*-hexane/toluene = 4:1) and then recrystallized from *n*-hexane/ $\text{CH}_2\text{Cl}_2$ , yielding  $\beta$ -bromoporphyrin **2H-2**.

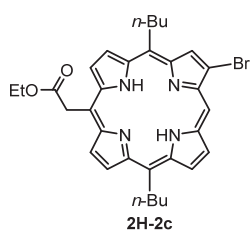

**2-Bromo-5,15-di-*n*-butyl-10-ethoxycarbonylmethylporphyrin (2H-2c)**

The bromination of **2H-1c** was carried out according to **GP-NBS-2H-1**. Purple crystal (33.0 mg, 41%):  $R_f = 0.58$  (silica gel, *n*-hexane/EtOAc = 3:1);  $^1\text{H-NMR}$  ( $\text{CDCl}_3$ , 500 MHz)  $\delta$ : 10.04 (1H, s), 9.52 (1H, d,  $J = 4.9$  Hz), 9.47 (1H, d,  $J = 4.5$  Hz), 9.42 (1H, d,  $J = 4.9$  Hz), 9.41 (1H, d,  $J = 4.6$  Hz), 9.39 (1H, d,  $J = 4.5$  Hz), 9.34 (1H, s), 9.29 (1H, d,  $J = 4.6$  Hz), 5.92 (2H, s), 4.83 (2H, t,  $J = 8.1$  Hz), 4.72 (2H, t,  $J = 8.1$  Hz), 4.18 (2H, q,  $J = 7.0$  Hz), 2.48–2.38 (4H, m), 1.82–1.73 (4H, m), 1.15

(3H, t,  $J = 7.0$  Hz), 1.12 (6H, t,  $J = 7.5$  Hz), 1.11 (3H, t,  $J = 7.5$  Hz),  $-3.18$  (1H, br s),  $-3.25$  (1H, br s);  $^{13}\text{C}$ -NMR ( $\text{CDCl}_3$ , 125 MHz)  $\delta$ : 172.5, 154.2 (br), 152.9 (br), 151.8 (br), 147.6 (br), 140.1 (br), 139.3 (br), 138.7 (br), 138.1 (br), 132.0, 131.4, 131.0, 129.0, 126.3, 125.7, 125.6, 123.8, 119.4, 119.0, 109.5, 101.4, 61.3, 41.3, 40.8, 40.6, 34.70, 34.65, 23.6 (2C), 14.2 (2C); IR (KBr): 3130, 2956, 2854, 1737, 1314, 1259, 1153, 1085, 1014, 839, 775, 755, 733  $\text{cm}^{-1}$ ; UV/vis ( $\text{CH}_2\text{Cl}_2$ )  $\lambda_{\text{max}}$  (log  $\epsilon$ ): 424 (5.3), 562 (3.9), 605 (3.7) nm; FAB-MS (dithiothreitol/thioglycerol = 1:1)  $m/z$  589 [M+2+H], 587 [M+H] $^+$ ; HRMS-FAB $^+$  ([M+H] $^+$ ): calcd for  $\text{C}_{32}\text{H}_{36}\text{BrN}_4\text{O}_2$ : 587.2022, found 587.2027.

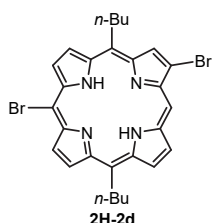

**2,10-Dibromo-5,15-di-*n*-butylporphyrin (2H-2d)**

The bromination of **2H-1d** was carried out according to **GP-NBS-2H-1**. Dark purple solid (199 mg, 71%):  $R_f = 0.53$  (silica gel, *n*-hexane/toluene = 1:1);  $^1\text{H}$ -NMR ( $\text{CDCl}_3$ , 300 MHz)  $\delta$ : 10.03 (1H, s), 9.70 (1H, d,  $J = 4.8$  Hz), 9.64 (1H, d,  $J = 4.8$  Hz), 9.41 (1H, d,  $J = 4.8$  Hz), 9.38 (1H, d,  $J = 4.8$  Hz), 9.31 (1H, d,  $J = 4.6$  Hz), 9.30 (1H, d,  $J = 4.6$  Hz), 9.30 (1H, s), 4.81 (2H, t,  $J = 8.0$  Hz), 4.70 (2H, t,  $J = 8.0$  Hz), 2.45–2.35 (4H, m), 1.78–1.75 (4H, m), 1.11 (3H, t,  $J = 7.3$  Hz), 1.10 (3H, t,  $J = 7.3$  Hz),  $-3.28$  (2H, br s);  $^{13}\text{C}$ -NMR ( $\text{CDCl}_3$ , THF- $d_8$ , 100 MHz)  $\delta$ : 154.8 (br), 152.2 (br), 152.0 (br), 147.6 (br), 140.2 (br), 139.8 (br), 138.0 (br), 137.0 (br), 135.7, 131.5, 131.0, 130.2, 129.2, 125.7 (2C), 124.1, 120.2, 119.5, 103.0, 101.8, 40.7, 40.5, 34.5, 34.4, 23.5 (2C), 14.0 (2C); IR (KBr): 3302, 2955, 2854, 1469, 1062, 975, 919, 847, 782, 712  $\text{cm}^{-1}$ ; UV/vis ( $\text{CH}_2\text{Cl}_2$ )  $\lambda_{\text{max}}$  (log  $\epsilon$ ): 418 (5.4), 517 (4.1), 552 (3.5), 595 (3.5), 652 (3.5) nm; FAB-MS (dithiothreitol/thioglycerol = 1:1)  $m/z$  583 [M+4+H], 581 [M+2+H], 579 [M+H] $^+$ ; HRMS-FAB $^+$  ([M+H] $^+$ ): calcd for  $\text{C}_{28}\text{H}_{29}\text{Br}_2\text{N}_4$ : 579.0759, found 579.0756; Anal. calcd for  $\text{C}_{28}\text{H}_{28}\text{Br}_2\text{N}_4$ : C, 57.95; H, 4.86; N, 9.65, found: C, 58.02; H, 5.09; N, 9.48.

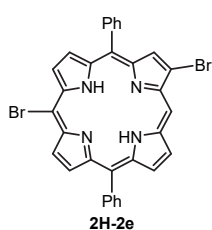

**2,10-Dibromo-5,15-diphenylporphyrin (2H-2e)**

The bromination of **2H-1e** was carried out according to **GP-NBS-2H-1**. Dark purple solid (46.6 mg, 74%):  $R_f = 0.58$  (silica gel, *n*-hexane/toluene = 1:1);  $^1\text{H}$ -NMR ( $\text{CDCl}_3$ , 400 MHz)  $\delta$ : 10.31 (1H, s), 9.74 (1H, d,  $J = 4.9$  Hz), 9.64 (1H, d,  $J = 4.9$  Hz), 9.38 (1H, d,  $J = 4.9$  Hz), 9.00 (1H, d,  $J = 4.9$  Hz), 8.99 (1H, d,  $J = 4.9$  Hz), 8.86 (1H, s), 8.82 (1H, d,  $J = 4.9$  Hz), 8.18–8.16 (4H, m), 7.79–7.77 (6H, m),  $-3.02$  (2H, br s);  $^{13}\text{C}$ -NMR ( $\text{CDCl}_3$ , THF- $d_8$ , 100 MHz)  $\delta$ : 154.5 (br), 153.2 (br), 152.0 (br), 149.2 (br), 140.9, 140.6, 140.1 (br), 139.8 (br), 139.1 (br), 137.9 (br), 135.0, 134.9, 134.5, 134.4 (2C), 134.3 (2C), 134.1, 129.8, 129.1 (2C), 129.0, 127.9, 127.8, 126.8 (2C), 126.7 (2C), 120.5, 119.8, 103.8, 102.8; IR (KBr): 3312, 3057, 1595, 1484, 1238, 1174, 1058, 974, 794, 725, 697  $\text{cm}^{-1}$ ; UV/vis ( $\text{CH}_2\text{Cl}_2$ )  $\lambda_{\text{max}}$  (log  $\epsilon$ ): 417 (5.7), 514 (4.5), 547 (3.8), 590 (3.9), 646 (3.6) nm; ESI-MS  $m/z$  623 [M+4+H], 621 [M+2+H], 619 [M+H] $^+$ ; HRMS-ESI $^+$   $m/z$  ([M+H] $^+$ ): calcd for  $\text{C}_{32}\text{H}_{21}\text{Br}_2\text{N}_4$ : 619.0133, found 619.0131; Anal. calcd for  $\text{C}_{32}\text{H}_{20}\text{Br}_2\text{N}_4$ : C, 61.96; H, 3.25; N, 9.03, found: C, 61.53; H, 3.32; N, 8.89.

## 6. General procedure for the bromination of zincated porphyrin **Zn-1** with NBS (GP-NBS-Zn-1) (Table 1)

A solution of NBS (19.6 mg, 110  $\mu\text{mol}$ , 1.1 equiv) in  $\text{CHCl}_3$  (10 mL) was added to a solution of zincated  $\beta$ -silylporphyrin **Zn-1** (100  $\mu\text{mol}$ ) in  $\text{CHCl}_3$  (10 mL) over 1 min at room temperature. The reaction mixture was then stirred at room temperature for 30 min, solvent was evaporated to dryness, and crude product was purified by silica gel column chromatography (cyclohexane/ $\text{CH}_2\text{Cl}_2$  = 4:1), yielding *meso*-bromoporphyrin **Zn-3**.

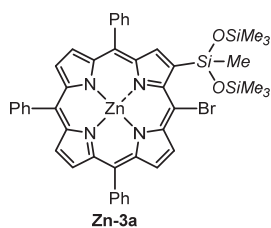

**[20-Bromo-2-(1,1,1,3,5,5,5-heptamethyltrisiloxan-3-yl)-5,10,15-triphenylporphyrinato]zinc(II) (**Zn-3a**)** The bromination of **Zn-1a** was carried out according to **GP-NBS-Zn-1**. Dark green solid (42.4 mg, 72%):  $R_f$  = 0.44 (silica gel, *n*-hexane/EtOAc = 10:1);  $^1\text{H-NMR}$  ( $\text{CDCl}_3$ , 300 MHz)  $\delta$ : 9.83 (1H, d,  $J$  = 4.8 Hz), 9.45 (1H, s), 8.95 (1H, d,  $J$  = 4.8 Hz), 8.89 (1H, d,  $J$  = 4.8 Hz), 8.87 (1H, d,  $J$  = 4.8 Hz), 8.87 (1H, d,  $J$  = 4.6 Hz), 8.85 (1H, d,  $J$  = 4.6 Hz), 8.19–8.15 (6H, m), 7.77–7.72 (9H, m), 0.93 (3H, s), 0.15 (18H, s);  $^{13}\text{C-NMR}$  ( $\text{CDCl}_3$ , 100 MHz)  $\delta$ : 154.5, 150.9, 150.62, 150.55, 150.52, 150.49, 150.0, 149.7, 147.8, 144.1, 142.7, 142.6, 142.5, 134.5 (2C), 134.42 (2C), 134.39 (2C), 134.1, 132.9, 132.5, 132.4, 132.32, 132.30, 127.75, 127.72, 127.69, 126.75 (2C), 126.71 (2C), 126.69 (2C), 121.9, 121.7, 121.1, 106.6, 4.1, 2.1 (6C); IR (KBr): 2955, 1487, 1440, 1258, 1087, 1054, 844, 795, 752, 702  $\text{cm}^{-1}$ ; UV/vis ( $\text{CH}_2\text{Cl}_2$ )  $\lambda_{\text{max}}$  (log  $\epsilon$ ): 423 (5.8), 554 (4.4), 594 (3.8) nm; FAB-MS (*m*-nitrobenzylalcohol)  $m/z$  900 [M+2], 898 [M] $^+$ ; HRMS-FAB $^+$  (M $^+$ ): calcd for  $\text{C}_{45}\text{H}_{43}\text{BrN}_4\text{O}_2\text{Si}_3\text{Zn}$ : 898.1169, found 898.1170; Anal. calcd for  $\text{C}_{45}\text{H}_{43}\text{BrN}_4\text{O}_2\text{Si}_3\text{Zn}$ : C, 59.96; H, 4.81; N, 6.22, found: C, 60.35; H, 4.65; N, 6.33.

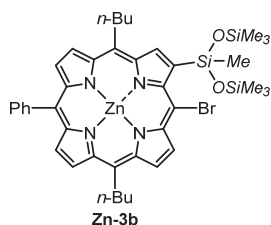

**[20-Bromo-5,15-di-*n*-butyl-2-(1,1,1,3,5,5,5-heptamethyltrisiloxan-3-yl)-10-phenylporphyrinato]zinc(II) (**Zn-3b**)** The bromination of **Zn-1b** was carried out according to **GP-NBS-Zn-1**. Dark purple solid (84.0 mg, 70%):  $R_f$  = 0.41 (silica gel, *n*-hexane/EtOAc = 10:1);  $^1\text{H-NMR}$  ( $\text{CDCl}_3$ , 400 MHz)  $\delta$ : 10.11 (1H, s), 9.53 (1H, d,  $J$  = 4.9 Hz), 9.35 (1H, d,  $J$  = 4.9 Hz), 9.01 (1H, d,  $J$  = 4.4 Hz), 8.97 (1H, d,  $J$  = 4.9 Hz), 8.79 (1H, d,  $J$  = 4.9 Hz), 8.65 (1H, d,  $J$  = 4.4 Hz), 8.08–8.06 (2H, m), 7.77–7.71 (3H, m), 4.92 (2H, t,  $J$  = 8.0 Hz), 4.27 (2H, t,  $J$  = 8.0 Hz), 2.60–2.52 (2H, m), 2.27–2.19 (2H, m), 1.92–1.88 (2H, m), 1.70–1.67 (2H, m), 1.18 (3H, t,  $J$  = 7.4 Hz), 1.08 (3H, s), 1.06 (3H, t,  $J$  = 7.4 Hz), 0.32 (18H, s);  $^{13}\text{C-NMR}$  ( $\text{CDCl}_3$ , 100 MHz)  $\delta$ : 153.4, 150.3, 150.0, 149.8, 149.6, 149.52, 149.48, 148.7, 144.2, 143.9, 142.8, 134.4 (2C), 133.9, 132.6, 132.2, 128.9, 128.8, 128.7, 127.5, 126.6 (2C), 121.1, 120.5, 120.3, 105.6, 41.5, 40.8, 35.8, 34.8, 24.0, 23.7, 14.4, 14.2, 4.3, 2.3 (6C); IR (KBr): 2956, 2858, 1258, 1068, 1009, 842, 789, 754  $\text{cm}^{-1}$ ; UV/vis ( $\text{CH}_2\text{Cl}_2$ )  $\lambda_{\text{max}}$  (log  $\epsilon$ ): 425 (5.9), 558 (4.4), 600 (4.0) nm; FAB-MS (*m*-nitrobenzylalcohol)  $m/z$  860 [M+2], 858 [M] $^+$ ; HRMS-FAB $^+$  (M $^+$ ): calcd for  $\text{C}_{41}\text{H}_{51}\text{BrN}_4\text{O}_2\text{Si}_3\text{Zn}$ : 858.1795, found 858.1799.



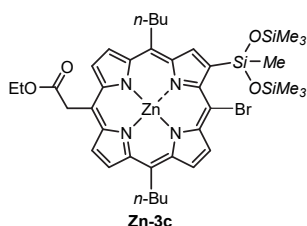

**[20-Bromo-5,15-di-*n*-butyl-10-ethoxycarbonylmethyl-2-(1,1,1,3,5,5,5-heptamethyltrisiloxan-3-yl)porphyrinato]zinc(II) (Zn-3c)**

The bromination of **Zn-1c**

was conducted according to **GP-NBS-Zn-1** with pyridine (24.4  $\mu$ L, 0.30 mmol, 1 equiv).

The crude product was purified by silica gel column chromatography (*n*-hexane/EtOAc

= 10:1). Dark green solid (123 mg, 47%):  $R_f$  = 0.17 (1/10 AcOEt/*n*-hexane);  $^1\text{H-NMR}$

( $\text{CDCl}_3$ , 500 MHz)  $\delta$ : 9.92 (1H, s), 9.64 (1H, d,  $J$  = 4.6 Hz), 9.05 (1H, d,  $J$  = 4.6 Hz), 8.81

(1H, d,  $J$  = 4.6 Hz), 8.74 (1H, d,  $J$  = 4.6 Hz), 8.62 (1H, d,  $J$  = 4.6 Hz), 8.59 (1H, d,  $J$  = 4.6 Hz), 5.15 (2H, s), 4.54 (2H,

t,  $J$  = 8.2 Hz), 4.16 (2H, t,  $J$  = 8.2 Hz), 3.98 (2H, q,  $J$  = 7.1 Hz), 2.37–2.31 (2H, m), 2.16–2.10 (2H, m), 1.83–1.80 (2H,

m), 1.68–1.65 (2H, m), 1.13 (3H, t,  $J$  = 7.4 Hz), 1.13 (3H, s), 1.06 (3H, t,  $J$  = 7.1 Hz), 1.05 (3H, t,  $J$  = 7.4 Hz), 0.37

(18H, s);  $^{13}\text{C-NMR}$  ( $\text{CDCl}_3$ , 125 MHz)  $\delta$ : 172.4, 153.1, 149.5, 149.1, 149.0, 148.90, 148.88, 148.7, 148.6, 143.9, 143.6,

133.8, 128.9, 128.8, 128.44, 128.394, 128.385, 120.37, 119.6, 109.1, 105.5, 61.0, 41.2, 40.7, 40.2, 35.4, 34.7, 23.9, 23.6,

14.2, 14.10, 14.07, 4.4, 2.3(6C); IR (KBr): 2956, 2856, 1737, 1313, 1260, 1153, 1060, 1015, 865, 838, 775, 755, 733

$\text{cm}^{-1}$ ; UV/vis ( $\text{CH}_2\text{Cl}_2$ )  $\lambda_{\text{max}}$  (log  $\epsilon$ ): 424 (5.9), 559 (4.4), 603 (4.0) nm; FAB-MS (*m*-nitrobenzylalcohol)  $m/z$  870 [ $\text{M}+2$ ],

868 [ $\text{M}$ ] $^+$ ; HRMS-FAB $^+$  ( $\text{M}^+$ ): calcd for  $\text{C}_{39}\text{H}_{53}\text{BrN}_4\text{O}_4\text{Si}_3\text{Zn}$ : 868.1849, found 868.1852; Anal. Calcd for

$\text{C}_{39}\text{H}_{53}\text{BrN}_4\text{O}_4\text{Si}_3\text{Zn}$ : C, 53.75; H, 6.13; N, 6.43, found: C, 53.69; H, 5.89; N, 6.48.

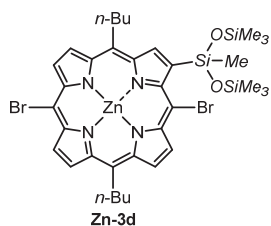

**[10,20-Dibromo-5,15-di(*n*-butyl)-2-(1,1,1,3,5,5,5-heptamethyltrisiloxan-3-yl)porphyrinato]zinc(II) (Zn-3d)**

The bromination of **Zn-1d** was carried out according to

**GP-NBS-Zn-1**. Dark purple solid (57.9 mg, 66%):  $R_f$  = 0.49 (silica gel, *n*-hexane/EtOAc =

10:1);  $^1\text{H-NMR}$  ( $\text{CDCl}_3$ , 400 MHz)  $\delta$ : 9.96 (1H, s), 9.70 (1H, d,  $J$  = 4.9 Hz), 9.57 (1H, d,  $J$  =

4.6 Hz), 9.50 (1H, d,  $J$  = 4.8 Hz), 9.35 (1H, d,  $J$  = 4.8 Hz), 9.31 (1H, d,  $J$  = 4.6 Hz), 9.24 (1H,

d,  $J$  = 4.9 Hz), 4.87 (2H, t,  $J$  = 8.2 Hz), 4.70 (2H, t,  $J$  = 8.2 Hz), 2.47–2.43 (2H, m), 2.39–

2.31 (2H, m), 1.82–1.80 (2H, m), 1.75–1.71 (2H, m), 1.12 (3H, t,  $J$  = 7.2 Hz), 1.07 (3H, t,  $J$  = 7.2 Hz), 1.00 (3H, s),

0.24 (18H, s);  $^{13}\text{C-NMR}$  ( $\text{CDCl}_3$ , THF- $d_8$ , 100 MHz)  $\delta$ : 153.7, 150.6, 150.5, 149.6, 149.3, 149.1, 148.8, 144.36, 144.35,

143.9, 134.3, 133.2, 132.9, 129.8, 129.7, 129.5, 121.6, 120.7, 105.9, 103.5, 41.6, 41.2, 35.7, 35.2, 23.9, 23.7, 14.31,

14.25, 4.2, 2.2 (6C); IR (KBr): 2957, 1258, 1058, 1011, 867, 841, 780, 754, 733  $\text{cm}^{-1}$ ; UV/vis ( $\text{CH}_2\text{Cl}_2$ )  $\lambda_{\text{max}}$  (log  $\epsilon$ ):

425 (5.7), 561 (4.1), 607 (4.0) nm; FAB-MS (*m*-nitrobenzylalcohol)  $m/z$  864 [ $\text{M}+4$ ], 862 [ $\text{M}+2$ ], 860 [ $\text{M}$ ] $^+$ ; HRMS-

FAB $^+$  ( $\text{M}^+$ ): calcd for  $\text{C}_{35}\text{H}_{46}\text{Br}_2\text{N}_4\text{O}_2\text{Si}_3\text{Zn}$ : 860.0587, found 860.0586; Anal. calcd for  $\text{C}_{35}\text{H}_{46}\text{Br}_2\text{N}_4\text{O}_2\text{Si}_3\text{Zn}$ : C, 48.64;

H, 5.37; N, 6.48, found: C, 48.91; H, 5.37; N, 6.40.

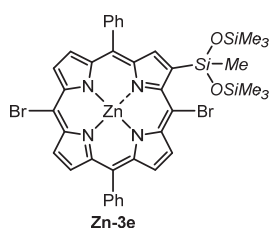

**[10,20-Dibromo-2-(1,1,1,3,5,5,5-heptamethyltrisiloxan-3-yl)-5,15-diphenylporphyrinato]zinc(II) (Zn-3e)**

The bromination of **Zn-1e** was conducted according to **GP-NBS-Zn-1** in the presence of 1 equiv of succinimide. Dark green solid (80.3 mg, 54%):  $R_f = 0.50$  (silica gel, *n*-hexane/EtOAc = 10:1);  $^1\text{H-NMR}$  ( $\text{CDCl}_3$ , 400 MHz)  $\delta$ : 9.71 (1H, d,  $J = 4.8$  Hz), 9.63 (1H, d,  $J = 4.8$  Hz), 9.60 (1H, d,  $J = 4.4$  Hz), 9.29 (1H, s), 8.83 (1H, d,  $J = 4.4$  Hz), 8.82 (1H, d,  $J = 4.4$  Hz), 8.82 (1H, d,  $J = 4.4$  Hz), 8.13–8.11 (4H, m),

7.73–7.71 (6H, m), 0.87 (3H, s), 0.09 (18H, s);  $^{13}\text{C-NMR}$  ( $\text{CDCl}_3$ , THF- $d_8$ , 100 MHz)  $\delta$ : 154.8, 150.74, 150.70, 150.6, 150.4, 150.2, 149.9, 149.8, 147.9, 144.0, 142.8, 142.6, 134.6 (2C), 134.5 (2C), 134.1, 133.23, 133.17, 133.0, 132.9, 132.8, 127.6 (2C), 126.5 (2C), 126.5 (2C), 122.0, 121.1, 106.8, 104.5, 4.0, 2.0 (6C); IR (KBr): 2956, 1259, 1080, 1017, 1005, 840, 786, 753, 728, 700  $\text{cm}^{-1}$ ; UV/vis ( $\text{CH}_2\text{Cl}_2$ )  $\lambda_{\text{max}}$  (log  $\epsilon$ ): 424 (5.9), 558 (4.6), 598 (4.1) nm; FAB-MS (*m*-nitrobenzylalcohol)  $m/z$  904 [M+4], 902 [M+2], 900 [M] $^+$ ; HRMS-FAB $^+$  ( $M^+$ ): calcd for  $\text{C}_{39}\text{H}_{38}\text{Br}_2\text{N}_4\text{O}_2\text{Si}_3\text{Zn}$ : 899.9961, found 899.9978; Anal. calcd for  $\text{C}_{39}\text{H}_{38}\text{Br}_2\text{N}_4\text{O}_2\text{Si}_3\text{Zn}$ : C, 51.81; H, 4.24; N, 6.20, found: C, 51.91; H, 4.36; N, 6.27.

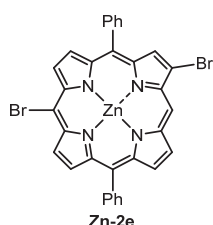

**[2,10-Dibromo-5,15-diphenylporphyrinato]zinc(II) (Zn-2e)**

The bromination of **Zn-1e** was conducted according to **GP-NBS-Zn-1** in the absence of succinimide. Dark purple solid (44.7 mg, 25%):  $R_f = 0.26$  (silica gel, *n*-hexane/EtOAc = 10:1);  $^1\text{H-NMR}$  ( $\text{CDCl}_3$ , THF- $d_8$ , 500 MHz)  $\delta$ : 10.14 (1H, s), 9.61 (2H, d,  $J = 4.6$  Hz), 9.21 (1H, d,  $J = 4.6$  Hz), 8.85 (1H, s), 8.85 (1H, d,  $J = 4.6$  Hz), 8.83 (1H, d,  $J = 4.6$  Hz), 8.82 (1H, d,  $J = 4.6$  Hz), 8.11–8.05 (4H, m), 7.70–7.63 (6H, m);  $^{13}\text{C-NMR}$  ( $\text{CDCl}_3$ , THF- $d_8$ , 125 MHz)  $\delta$ : 150.7, 150.6, 150.4, 150.1, 149.5, 148.1, 146.2, 142.5,

142.2, 134.4 (2C), 134.3 (2C), 132.9 (2C), 132.7, 132.6, 132.54, 132.51, 132.1, 127.4, 127.3, 126.4 (2C), 126.3 (2C), 121.1, 120.9, 120.3, 104.6, 103.4 (2C); IR (KBr): 2924, 1597, 1489, 1319, 1273, 1072, 1001, 789, 744, 698  $\text{cm}^{-1}$ ; UV/vis ( $\text{CH}_2\text{Cl}_2$ )  $\lambda_{\text{max}}$  (log  $\epsilon$ ): 420 (5.6), 551 (4.3), 591 (3.4) nm; EI-MS (70 eV)  $m/z$  (relative intensity): 684 [100, M+4], 682 [98, M+2], 680 [36, M $^+$ ], 604 [13, M - C $_6$ H $_5$ ]; HRMS (EI)  $m/z$ : calcd for  $\text{C}_{32}\text{H}_{18}\text{N}_4\text{Br}_2$ : 679.9190, found 679.9190.

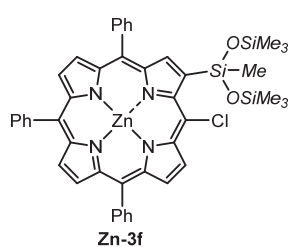

**[20-Chloro-2-(1,1,1,3,5,5,5-heptamethyltrisiloxan-3-yl)-5,10,15-triphenylporphyrinato]zinc(II) (Zn-3f)**

A solution of NCS (14.7 mg, 110  $\mu\text{mol}$ , 1.1 equiv) in  $\text{CHCl}_3$  (10 mL) was added to a solution of zincated  $\beta$ -silylporphyrin **Zn-1a** (100  $\mu\text{mol}$ ) in  $\text{CHCl}_3$  (10 mL) over 1 min at room temperature. The reaction mixture was stirred at room temperature for 3 h, solvent was evaporated to dryness, and crude product was purified by silica gel column chromatography (cyclohexane/ $\text{CH}_2\text{Cl}_2$  = 10:1). Dark green solid (62.0 mg, 70%):  $R_f = 0.39$  (1/10 AcOEt/*n*-hexane);  $^1\text{H-NMR}$  ( $\text{CDCl}_3$ , 500 MHz)  $\delta$ : 9.71 (1H, d,  $J = 4.6$  Hz), 9.30 (1H, s), 8.89 (1H, d,  $J = 4.6$  Hz), 8.80 (1H, d,  $J = 4.6$  Hz), 8.78 (1H, d,  $J = 4.6$  Hz), 8.78 (1H, d,  $J = 4.6$  Hz), 8.77 (1H, d,  $J = 4.6$  Hz), 8.15–8.14 (6H, m), 7.71–7.69 (9H, m), 0.85 (3H, s), 0.11 (18H, s);  $^{13}\text{C-NMR}$  ( $\text{CDCl}_3$ , THF- $d_8$ , 125 MHz)  $\delta$ : 152.7, 150.7, 150.5, 150.3, 150.2, 150.0, 149.4, 148.6, 146.5, 143.15, 143.14, 143.06, 141.6, 134.6 (2C), 134.48 (2C), 134.47 (2C), 132.3, 132.01, 131.98, 131.92, 131.87, 131.86, 130.6, 127.40, 127.36, 126.46 (2C), 126.45 (2C), 126.41 (2C), 121.3, 121.0, 120.6, 114.2, 3.1, 2.0 (6C); IR (KBr): 3047, 2955, 1258, 1089, 1055, 1007, 839, 795, 752, 721, 703

cm<sup>-1</sup>; UV/vis (CH<sub>2</sub>Cl<sub>2</sub>) λ<sub>max</sub> (log ε): 423 (5.9), 554 (4.5), 591 (3.9) nm; FAB-MS (*m*-nitrobenzylalcohol) *m/z* 856 [M+2], 854 [M]<sup>+</sup>; HRMS-FAB<sup>+</sup> (M<sup>+</sup>): calcd for C<sub>45</sub>H<sub>43</sub>ClN<sub>4</sub>O<sub>2</sub>Si<sub>3</sub>Zn: 854.1674, found 854.1675; Anal. calcd for C<sub>45</sub>H<sub>43</sub>ClN<sub>4</sub>O<sub>2</sub>Si<sub>3</sub>Zn: C, 63.07; H, 5.06; N, 6.54, found: C, 63.24; H, 5.10; N, 6.55.

#### 7. General procedure for the bromination of **2H-1a** (Table 2, other than NBS)

A solution of the brominating agent (DBDMH, Br<sub>2</sub>, Br<sub>2</sub>·1,4-dioxane, BDMS, 110 μmol, 1.1 equiv) in CHCl<sub>3</sub> (10 mL) was added to a solution of free-base β-silylporphyrin **2H-1a** (100 μmol) in CHCl<sub>3</sub> (10 mL) over 10 min at 0 °C. The reaction mixture was allowed to warm to room temperature while being stirred for 2 h. The reaction was quenched using sat. aqueous Na<sub>2</sub>S<sub>2</sub>O<sub>3</sub>. The organic layer was washed successively using water and brine, dried over MgSO<sub>4</sub>, and filtered. The filtrate was concentrated under reduced pressure. The crude product was purified by silica gel column chromatography (*n*-hexane/toluene = 4:1) and then recrystallized from *n*-hexane/CH<sub>2</sub>Cl<sub>2</sub>, yielding β-bromoporphyrin **2H-2a**.

#### 8. General procedure for the bromination of **Zn-1a** (Table 2, other than NBS, NCS)

A solution of the brominating agent (DBDMH, Br<sub>2</sub>, Br<sub>2</sub>·1,4-dioxane, BDMS, 110 μmol, 1.1 equiv) in CHCl<sub>3</sub> (10 mL) was added to a solution of free-base β-silylporphyrin **2H-1a** (100 μmol) in CHCl<sub>3</sub> (10 mL) over 1 min at 0 °C. The reaction mixture was allowed to warm to room temperature while being stirred for 30–90 min (3 h for NCS). The reaction was quenched with sat. aqueous Na<sub>2</sub>S<sub>2</sub>O<sub>3</sub>. The organic layer was washed successively using water and brine, dried over MgSO<sub>4</sub>, and filtered. The filtrate was concentrated under reduced pressure, and the crude product was purified by silica gel column chromatography (cyclohexane/toluene = 4:1), yielding a mixture of **Zn-2a**, **Zn-3a**, and recovered **Zn-1a**. The yields of **Zn-2a**, **Zn-3a** and recovered **Zn-1a** were determined by the integral ratio of the mixture's <sup>1</sup>H-NMR spectra.

## 9. Determination of the structure of Zn-3a

The structure of **Zn-3a** was determined by comparing the  $^1\text{H-NMR}$  spectrum of the desilylated product **Zn-6** with those of [5-Bromo-10,15,20-triphenylporphyrinato]zinc (II) (**Zn-6**),<sup>5</sup> which was synthesized from 5,10,15-triphenylporphyrin via a known procedure.<sup>4,6</sup>

Scheme S1

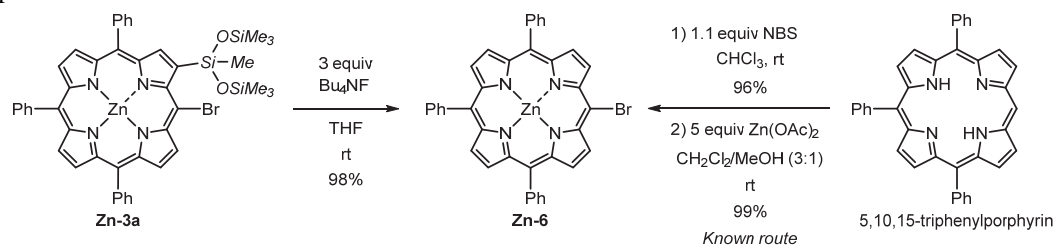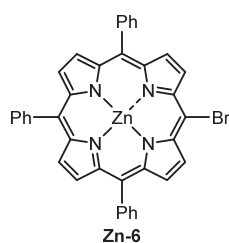

**[5-Bromo-10,15,20-triphenylporphyrinato]zinc (II) (Zn-6)** A solution of  $\text{Bu}_4\text{NF}$  (1 mol/L in THF, 200  $\mu\text{L}$ , 3.0 equiv) was added to a solution of *meso*-bromo- $\beta$ -silylporphyrin **Zn-3a** (67  $\mu\text{mol}$ ) in THF (15 mL). The solution was stirred at room temperature for 30 min, and the solvent was evaporated to dryness. The crude product was purified by silica gel column chromatography (silica gel, *n*-hexane/ $\text{EtOAc}$  = 3:1) and then recrystallized from *n*-hexane/ $\text{CH}_2\text{Cl}_2$  to give **Zn-6**.

Purple solid (44.2 mg, 98%):  $^1\text{H-NMR}$  ( $\text{CDCl}_3$ , 300 MHz)  $\delta$ : 9.68 (2H, d,  $J$  = 4.6 Hz), 8.89 (2H, d,  $J$  = 4.6 Hz), 8.79 (4H, s), 8.15–8.13 (6H, m), 7.73–7.68 (9H, m); ESI-MS  $m/z$  680 [ $\text{M}+2$ ], 678 [ $\text{M}$ ] $^+$ ; HRMS-ESI $^+$   $m/z$  ( $\text{M}^+$ ): calcd for  $\text{C}_{38}\text{H}_{23}\text{BrN}_4\text{Zn}$ : 678.0398, found 678.0390.

## 10. X-ray crystal structure of Zn-3c

Single crystals of **Zn-3c** were mounted on a MicroMount® polyimide tip using paraffin oil. Using filtered Cu K $\alpha$  radiation, all measurements were taken using a Rigaku R-Axis RAPID imaging plate diffractometer. The data were corrected for Lorentz and polarization effects and numerical absorption. The structures were solved by direct methods<sup>7</sup> and expanded by Fourier techniques. The non-hydrogen atoms were refined anisotropically, and the hydrogen atoms were refined using a riding model. All calculations were conducted using the CrystalStructure<sup>8</sup> crystallographic software package, except for refinement, which was conducted using SHELXL 2014.<sup>9</sup>

**Table S1.** Experimental Data for the X-ray Crystallography of **Zn-3c**

| parameter       |                                                                                    | parameter                               |            | parameter                   |               |
|-----------------|------------------------------------------------------------------------------------|-----------------------------------------|------------|-----------------------------|---------------|
| formula         | C <sub>39</sub> H <sub>53</sub> N <sub>4</sub> O <sub>4</sub> BrSi <sub>3</sub> Zn | $\beta$ /deg                            | 102.47000  | no. of measured reflections | 23355         |
| Mw              | 871.41                                                                             | $\gamma$ /deg                           | 91.92000   | no. of unique reflections   | 7189          |
| crystal size/mm | 0.181 x 0.017 x 0.005                                                              | $V/\text{\AA}^3$                        | 2029.22248 | $R_{\text{int}}$            | 0.2528        |
| crystal system  | triclinic                                                                          | space group                             | $P-1$ (#2) | goodness of fit             | 1.046         |
| $a/\text{\AA}$  | 9.34408                                                                            | $Z$                                     | 2          | $R_1$                       | 0.1381        |
| $b/\text{\AA}$  | 13.50930                                                                           | $g/\text{cm}$                           | 1.426      | $wR_2$                      | 0.3577        |
| $c/\text{\AA}$  | 16.70250                                                                           | $\mu$ (Cu K $\alpha$ )/cm <sup>-1</sup> | 31.994     | Structure solv              | SHELXT        |
| $\alpha$ /deg   | 98.85800                                                                           | $T/\text{K}$                            | 93         | Refinement                  | SHELXL 2014/7 |

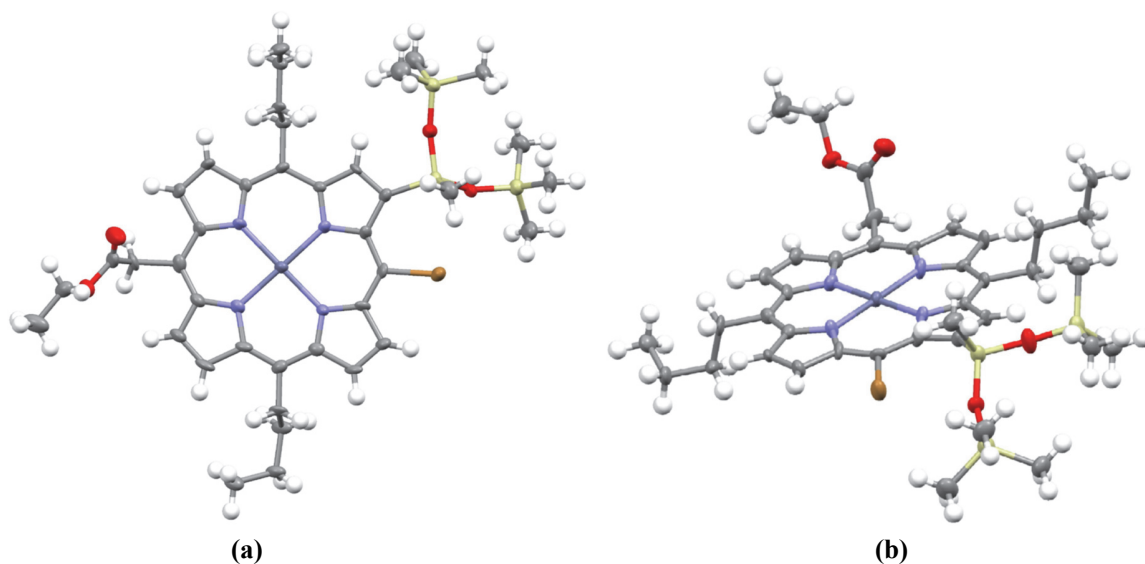

Figure S1. Crystal structure of **Zn-3c**; atomic thermal ellipsoids are drawn at the 30% probability level for non-hydrogen atoms. (a) Top view. (b) Front view. Hydrogen atoms are omitted for clarity. (CCDC, 2035888)

## 11. Functionalization of Zn-3a

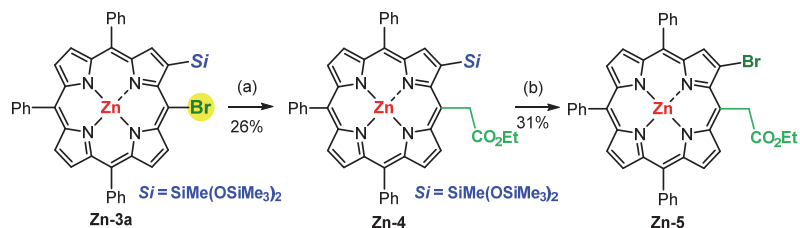

Reaction conditions—(a)  $\text{BrZnCH}_2\text{CO}_2\text{Et}$  (50 equiv),  $\text{Pd}(\text{OAc})_2$  (10 mol%),  $\text{Cy}_3\text{P}$  (20 mol%), THF, 60 °C, and 2 d; (b) NBS (1.5 equiv),  $\text{CHCl}_3$ , room temperature, and 1 h

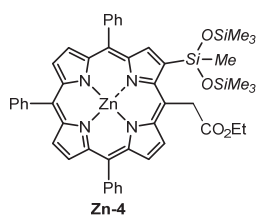

**[7-(1,1,1,3,5,5,5-Heptamethyltrisiloxan-3-yl)-5-(2-ethoxycarbonyl)ethyl]-10,15,20-triphenylporphyrinato]zinc(II) (Zn-4)** An oven-dried 50 mL two-necked flask equipped with a magnetic stirring bar and rubber septum was charged using Zn dust (650 mg, 10 mmol) and CuCl (94 mg). The reaction vessel was evacuated and flushed using argon (three times), and dry THF (4 mL) was added. The suspension was heated at 65 °C for 2 h using an oil bath.

During this activation period, another oven-dried 5 mL flask was evacuated and flushed using argon (three times) and then charged using dry THF (1 mL) and ethyl bromoacetate (280  $\mu\text{L}$ , 2.5 mmol). The reaction vessel containing the Zn(Cu) couple was removed from the oil bath. To initiate the reaction, approximately one tenth of the THF–ethyl bromoacetate solution was added using a syringe to the stirred, still-hot Zn(Cu) couple suspension. The rest of the solution was added at such a rate as to maintain a gentle reflux (ac. 10 min). The reaction mixture was stirred and heated at 65 °C for 2 h. A mixture of *meso*-bromoporphyrin **Zn-3a** (45 mg, 0.05 mmol),  $\text{Pd}(\text{OAc})_2$  (1.1 mg, 10 mol%), and  $\text{Cy}_3\text{P}$  (2.8 mg, 20 mol%) in THF (10 mL) was then added to the resulting ~0.5-M THF solution of the zinc enolate. This reaction mixture was then heated under argon at 65 °C for 2 d and then allowed to reach room temperature. The reaction mixture was filtered using filter paper, diluted using  $\text{Et}_2\text{O}$ , and washed using aqueous  $\text{NH}_4\text{Cl}$  and brine. The organic layer was dried over anhydrous  $\text{MgSO}_4$  and concentrated in vacuo. Column chromatography on silica gel ( $\text{CH}_2\text{Cl}_2$ ), followed by recrystallization from  $\text{CH}_2\text{Cl}_2/\text{MeOH}$ , yielded the product **Zn-4**. Purple solid (11.8 mg, 26%):  $R_f = 0.33$  (1/1  $\text{CH}_2\text{Cl}_2/n$ -hexane);  $^1\text{H-NMR}$  ( $\text{CDCl}_3$ , 500 MHz)  $\delta$ : 9.48 (1H, d,  $J = 4.6$  Hz), 9.39 (1H, s), 8.98 (1H, d,  $J = 4.6$  Hz), 8.88 (1H, d,  $J = 5.0$  Hz), 8.85 (2H, s), 8.85 (1H, d,  $J = 5.0$  Hz), 8.18–8.16 (6H, m), 7.76–7.69 (9H, m), 6.42 (2H, s), 4.16 (2H, q,  $J = 7.1$  Hz), 1.14 (3H, t,  $J = 7.1$  Hz), 0.69 (3H, s), 0.16 (18H, s);  $^{13}\text{C-NMR}$  ( $\text{CDCl}_3$ , 125 MHz)  $\delta$ : 173.9, 155.1, 151.1, 150.4, 150.3, 150.01, 149.98, 149.4, 149.1, 146.4, 143.0, 142.8, 142.7, 140.6, 134.37 (2C), 134.34 (2C), 134.32 (2C), 132.7, 132.2, 131.9, 131.8, 131.7, 129.2, 127.47, 127.46, 127.43, 126.53 (2C), 126.5 (2C), 126.48 (2C), 121.4, 121.0, 119.8, 112.8, 61.0, 43.0, 14.2, 2.5, 1.9 (6C); IR (KBr): 3055, 2956, 1743, 1597, 1512, 1487, 1439, 1365, 1340, 1257, 1194, 1161, 1027, 843, 791, 754, 721, 702  $\text{cm}^{-1}$ ; UV/vis ( $\text{CHCl}_3$ )  $\lambda_{\text{max}}$  (log  $\epsilon$ ): 428 (5.9), 562 (4.5), 600 (3.9) nm; FAB-MS (*m*-nitrobenzylalcohol)  $m/z$  906 ( $\text{M}^+$ ); HRMS-FAB $^+$  ( $\text{M}^+$ ): calcd for  $\text{C}_{49}\text{H}_{50}\text{N}_4\text{O}_4\text{Si}_3\text{Zn}$ : 906.2431, found 906.2425.

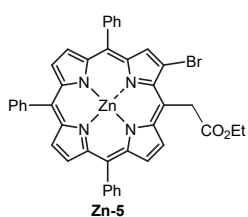

**[7-Bromo-5-(2-ethoxycarbonylethyl)-10,15,20-triphenylporphyrinato]zinc(II) (Zn-5)** A solution of NBS (5.5 mg, 31  $\mu\text{mol}$ , 1.4 equiv) in  $\text{CHCl}_3$  (2 mL) was added to a solution of zincated  $\beta$ -silylporphyrin **Zn-4** (20 mg, 22  $\mu\text{mol}$ ) in  $\text{CHCl}_3$  (2 mL) over 1 min at room temperature. This reaction mixture was stirred at room temperature for 1 h, and the solvent was evaporated to dryness. The crude product was purified by silica gel column chromatography ( $\text{CH}_2\text{Cl}_2$  only) and then recrystallized from *n*-hexane/ $\text{CH}_2\text{Cl}_2$ , yielding **Zn-5**. Purple solid (5.3

mg, 31%):  $R_f = 0.56$  ( $\text{CH}_2\text{Cl}_2$ );  $^1\text{H-NMR}$  ( $\text{CDCl}_3$ , 500 MHz)  $\delta$ : 9.39 (1H, d,  $J = 5.0$  Hz), 9.06 (1H, s), 8.94 (1H, d,  $J = 5.0$  Hz), 8.88 (1H, d,  $J = 4.6$  Hz), 8.86 (1H, d,  $J = 4.6$  Hz), 8.85 (1H, d,  $J = 4.6$  Hz), 8.84 (1H, d,  $J = 4.6$  Hz), 8.16–8.14 (6H, m), 7.79–7.70 (9H, m), 6.34 (2H, s), 4.31 (2H, q,  $J = 7.1$  Hz), 1.30 (3H, t,  $J = 7.1$  Hz);  $^{13}\text{C-NMR}$  ( $\text{CDCl}_3$ , 125 MHz)  $\delta$ : 173.1, 151.4, 150.9, 150.7, 150.5, 150.2, 150.0, 147.0, 143.9, 142.49, 142.46, 142.44, 137.3, 134.39 (2C), 134.35 (2C), 134.33 (2C), 133.0, 132.40, 132.37, 132.36, 132.31, 129.1, 127.7, 127.61, 127.59, 126.63 (2C), 126.62 (2C), 126.58 (2C), 121.6, 121.4, 120.1, 117.1, 111.4, 61.3, 39.9, 14.4; IR (KBr): 3101, 3055, 2979, 1718, 1622, 1597, 1487, 1439, 1327, 1194, 1155, 1070, 1031, 999, 964, 906, 792, 750, 732, 704  $\text{cm}^{-1}$ ; UV/vis ( $\text{CHCl}_3$ )  $\lambda_{\text{max}}$  (log  $\epsilon$ ): 428 (5.5), 562 (4.1), 603 (3.6) nm; FAB-MS (*m*-nitrobenzylalcohol)  $m/z$  766 [ $\text{M}+2$ ], 764 [ $\text{M}$ ] $^+$ ; HRMS-FAB $^+$  ( $\text{M}^+$ ): calcd for  $\text{C}_{42}\text{H}_{29}\text{BrN}_4\text{O}_2\text{Zn}$ : 764.0765, found 764.0762.

## 12. References

- 1 N. Sugita, S. Hayashi, M. Shibata, T. Endo, M. Noji, K. Takatori and T. Takanami, *Org. Biomol. Chem.*, 2016, **14**, 10189.
- 2 T. Takanami, M. Yotsukura, W. Inoue, N. Inoue, F. Hino, K. Suda, *Heterocycles*, 2008, **76**, 439.
- 3 S. G. DiMugno, V. S.-Y. Lin, M. J. Therien, *J. Org. Chem.* 1993, **58**, 5983.
- 4 D. K. Dogutan, D. K. Bediako, T. S. Teets, M. Schwalbe, D. G. Nocera, *Org. Lett.* 2010, **12**, 1036.
- 5 K. Tomizaki, A. B. Lysenko, M. Taniguchi, J. S. Lindsey, *Tetrahedron*, 2004, **60**, 2011.
- 6 (a) T. Takanami, M. Hayashi, H. Chijimatsu, W. Inoue and K. Suda *Org. Lett.*, 2005, **7**, 3937; (b) Z. Abada, L. Ferrié, B. Akagah, A. T. Lormier, B. Figadère, *Tetrahedron Lett.*, 2011, **52**, 3175.
- 7 SHELXT Version 2014/5: SHELXT: Integrating Space Group Determination and Structure Solution. G. M. Sheldrick, *Acta Cryst.*, 2014, **A70**, C1437.
- 8 CrystalStructure 4.2.2: Crystal Structure Analysis Package, Rigaku Corporation (2000–2016). Tokyo 196-8666, Japan; CRYSTALS Issue 11: J.R. Carruthers, J. S. Rollett, P. W. Betteridge, D. Kinna, L. Pearce, A. Larsen and E. Gabe, Chemical Crystallography Laboratory, Oxford, UK. (1999)
- 9 SHELXL Version 2014/7: G. M. Sheldrick, *Acta Cryst.*, 2008, **A64**, 112.

### 13. NMR Spectra Zn-1c-1

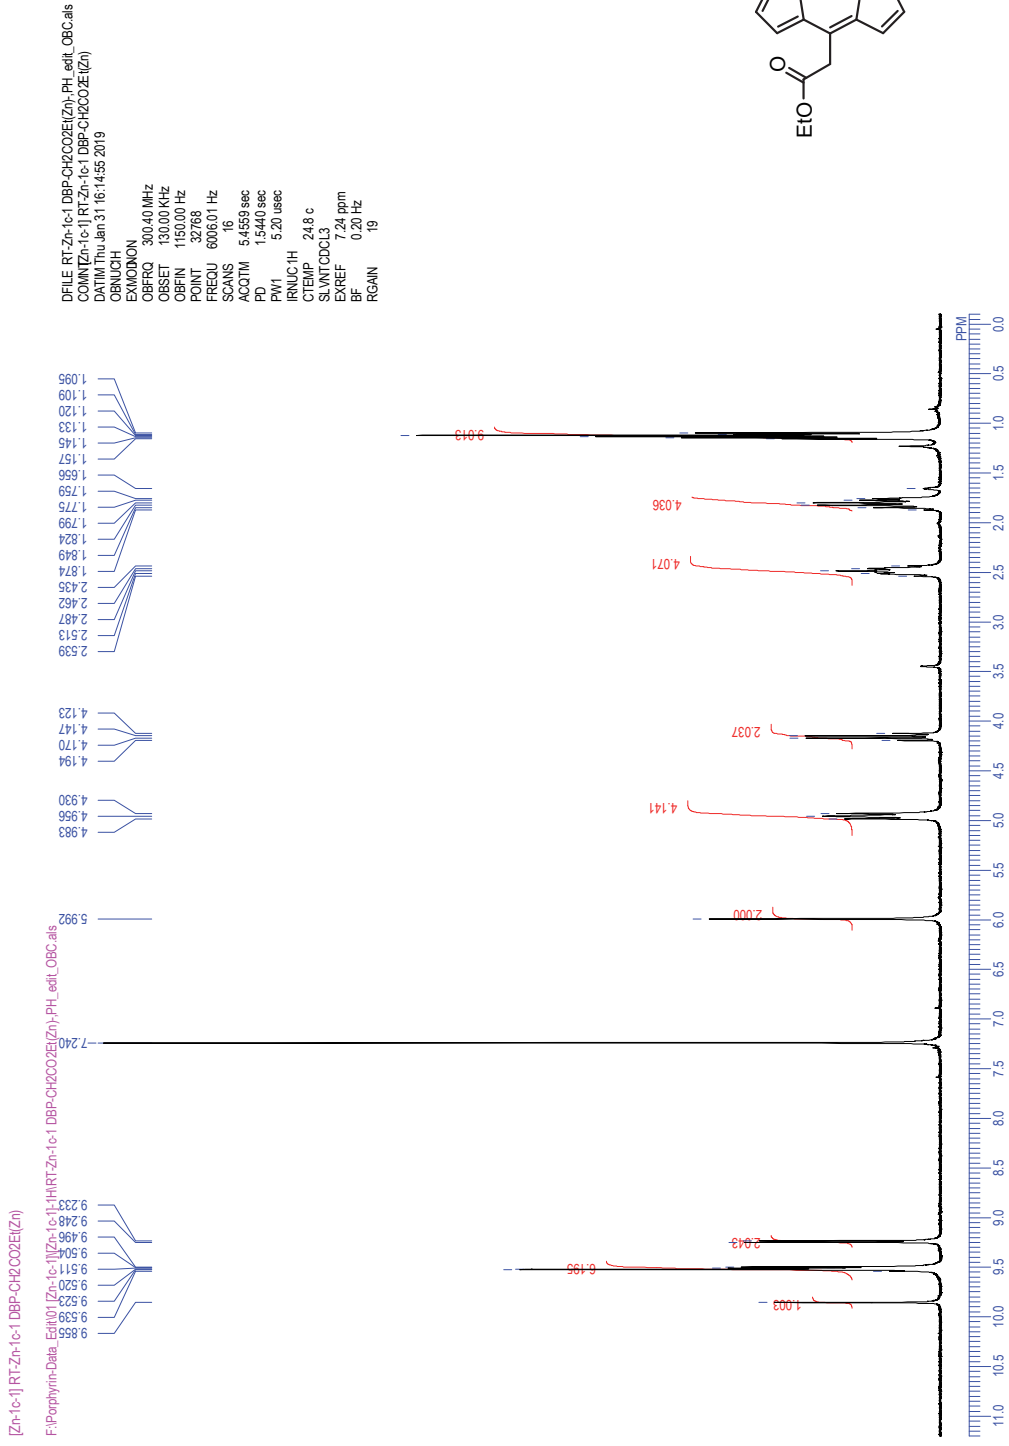



# Zn-1c-1

bcm

D:\Porphyrin-Dat01 [Zn-1c-1]-13CIRT-Zn-1c-1-01\_13C-0WCEä.als

DFILE RT:Zn-1c-1-01\_13C-0WCEä.als  
COMINT bcm  
DATEM Thu Jan 24 00:38:35 2019  
DATUM 13C  
OBNUC bcm  
EXIMOD bcm  
OBFREQ 125.65 MHz  
OBSETE 120.00 KHz  
OBFIN 7956.00 Hz  
POINT 32768  
FREQU 33898.30 Hz  
SCANS 25000  
ACQTM 0.9667 sec  
PD 2.0333 sec  
PW1 4.90 usec  
IRNUC 1H  
CTEMP 27.9 c  
SLWT CDC13  
EXREF 77.00 ppm  
BF 0.20 Hz  
RGAIN 30

14.066  
14.140  
23.632  
35.230  
41.095  
41.178  
60.845

173.132  
150.043  
149.698  
149.138  
148.826  
131.536  
129.002  
128.945  
128.854  
119.362  
109.285  
104.391

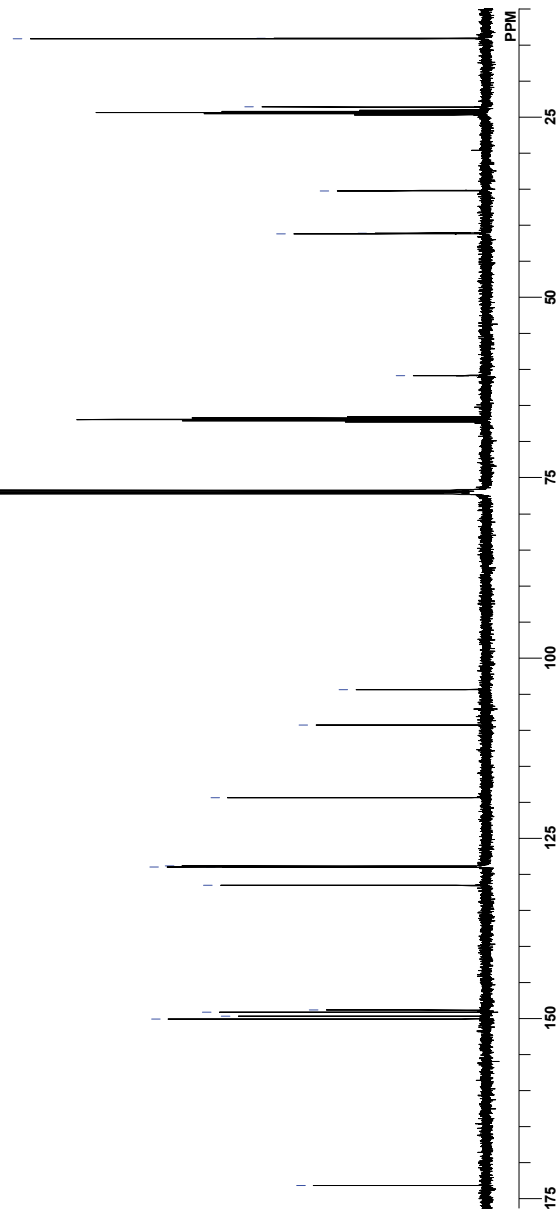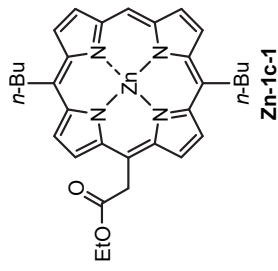

# 2H-1c-1

ET12-9

F:\PopPhyIn-Data\_Edms02\2H-1c-1\2H-1c-1-1\HRT12-9\_1H-13C\data

DFILE RT12-9\_1H-13C\data  
CONVET12-9  
DATIM Fri Jan 18 22:34:24 2019  
ORNUCH  
EXM00ner  
CFFRQ 500.00 MHz  
CBSSET 160.00 KHz  
CFFIN 2160.00 Hz  
POINT 32768  
FREQU 10000.00 Hz  
SCANS 16  
ACQTM 3.2768 sec  
PD 3.7232 sec  
PW1 5.00 usec  
IRNUC1H  
CTEMP 27.4 c  
SLVNTCDCL3  
EXREF 7.24 ppm  
BF 5.79 Hz  
RGAIN 27

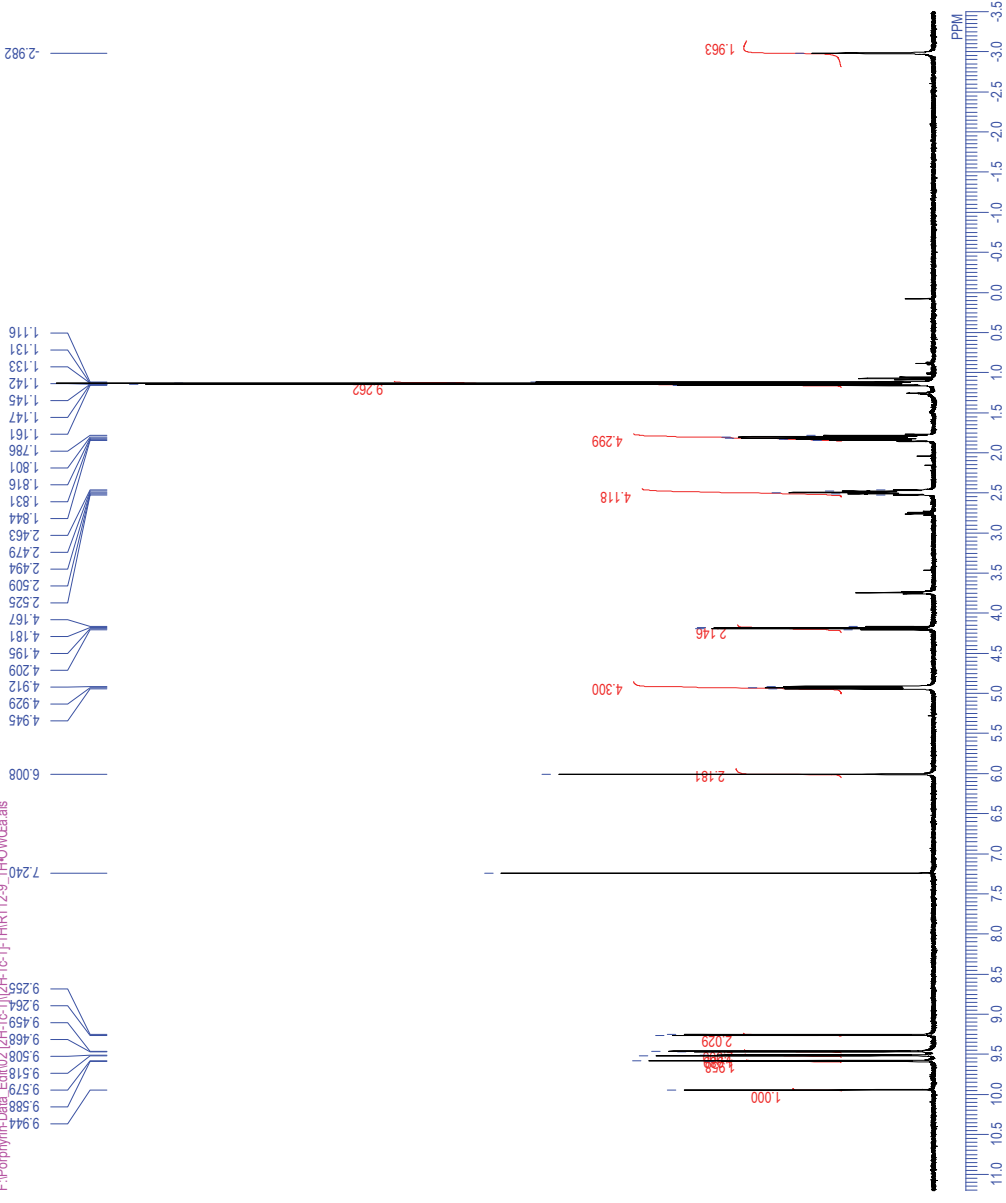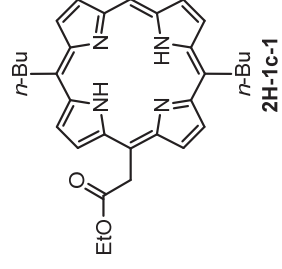

# 2H-1c-1

RT12-9

D:\Porphyrin-Data\02 [2H-1c-1][2H-1c-1]-13C[RT12-9\_13C-OWCE].als

DFILE RT12-9\_13C-OWCE.als  
COMINT RT12-9  
DATIM Sat Jan 19 15:15:46 2019  
ORNUC 13C  
EXMOD bcm  
OBFREQ 125.65 MHz  
OBSET 120.00 KHz  
OBFIN 7958.00 Hz  
POINT 32768  
FREQU 33898.30 Hz  
SCANS 20000  
ACQTM 0.9667 sec  
PD 2.0333 sec  
PWI 4.90 usec  
IRNUC 1H  
CTEMP 27.8 c  
SLVNT CDCL3  
EXREF 77.10 ppm  
BF 5.79 Hz  
RGAIN 30

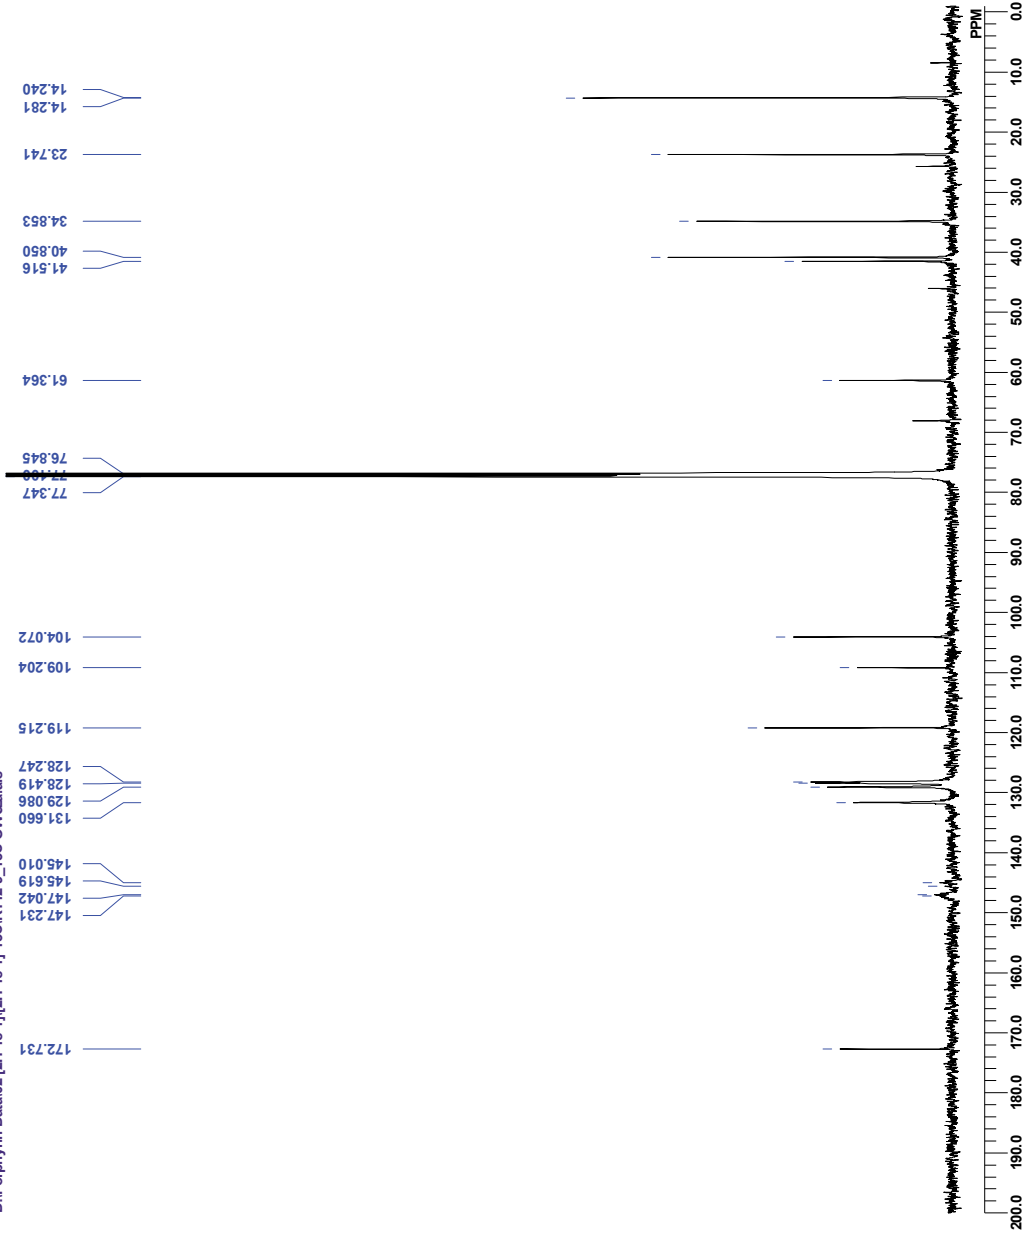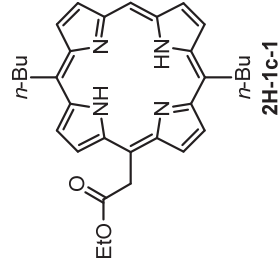

**2H-1c**

**RT-6-4betaSi(2H)**

D:\Porphyrin-Data\03 [2H-1c]\[2H-1c]-1HIRT-6-4betaSi(2H)-0WCEE\1H.als

DFILE RT-6-4betaSi(2H)-0WCEE\1H.als  
 COMMENT RT-6-4betaSi(2H)  
 DATIMI Tue Aug 22 16:27:03 2017  
 1H  
 EXMOD NON  
 OBNUC 300.40 MHz  
 OBFREQ 130.00 KHz  
 OBSET 1150.00 Hz  
 OBFIN 32768  
 POINT 6006.01 Hz  
 FREOU 16  
 SCANS 5.4559 sec  
 ACQTM 1.5440 sec  
 PD 5.20 usec  
 PW1 1H  
 IRNUC 25.0 c  
 CTEMP CDCL3  
 SLVNT 7.24 ppm  
 EXREF 0.09 Hz  
 BF 21  
 RGAIN

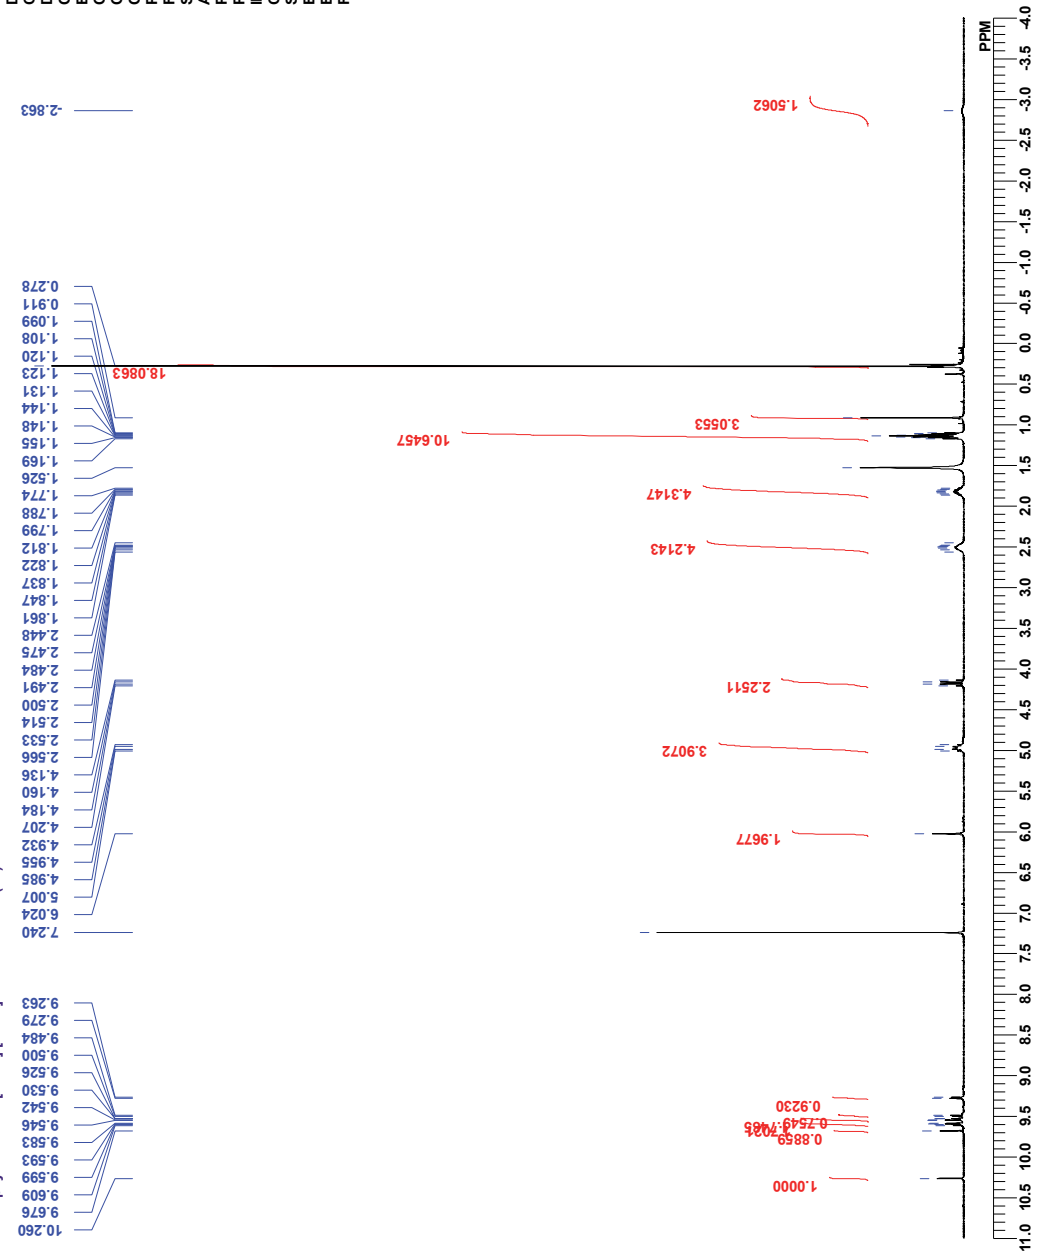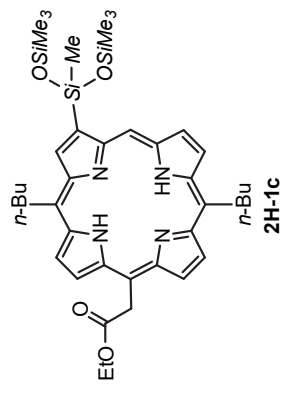

**2H-1c**

bcm

D:\Porphyrin-Data\03 [2H-1c]-13C\RT-06-03-03\_13C[2H-1c]-OWCEa.als

DFILE RT-06-03-03\_13C[2H-1c]-OWCEa.als  
 COMNT bcm  
 DATIM Wed Jan 23 02:53:27 2019  
 OBNUC 13C  
 EXMOD bcm  
 OBFREQ 125.65 MHz  
 OBSSET 120.00 KHz  
 OBFIN 7958.00 Hz  
 POINT 32768  
 FREQU 33898.30 Hz  
 SCANS 12000  
 ACQTIM 0.9667 sec  
 PD 2.0333 sec  
 PW1 4.90 usec  
 IRNUC 1H  
 CTEMP 27.9 c  
 SLVNT CDCL3  
 EXREF 77.00 ppm  
 BF 3.50 Hz  
 RGAIN 30

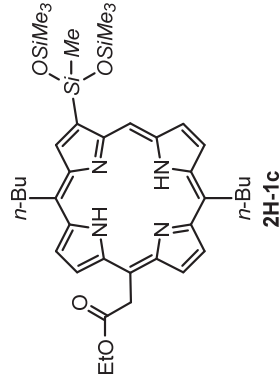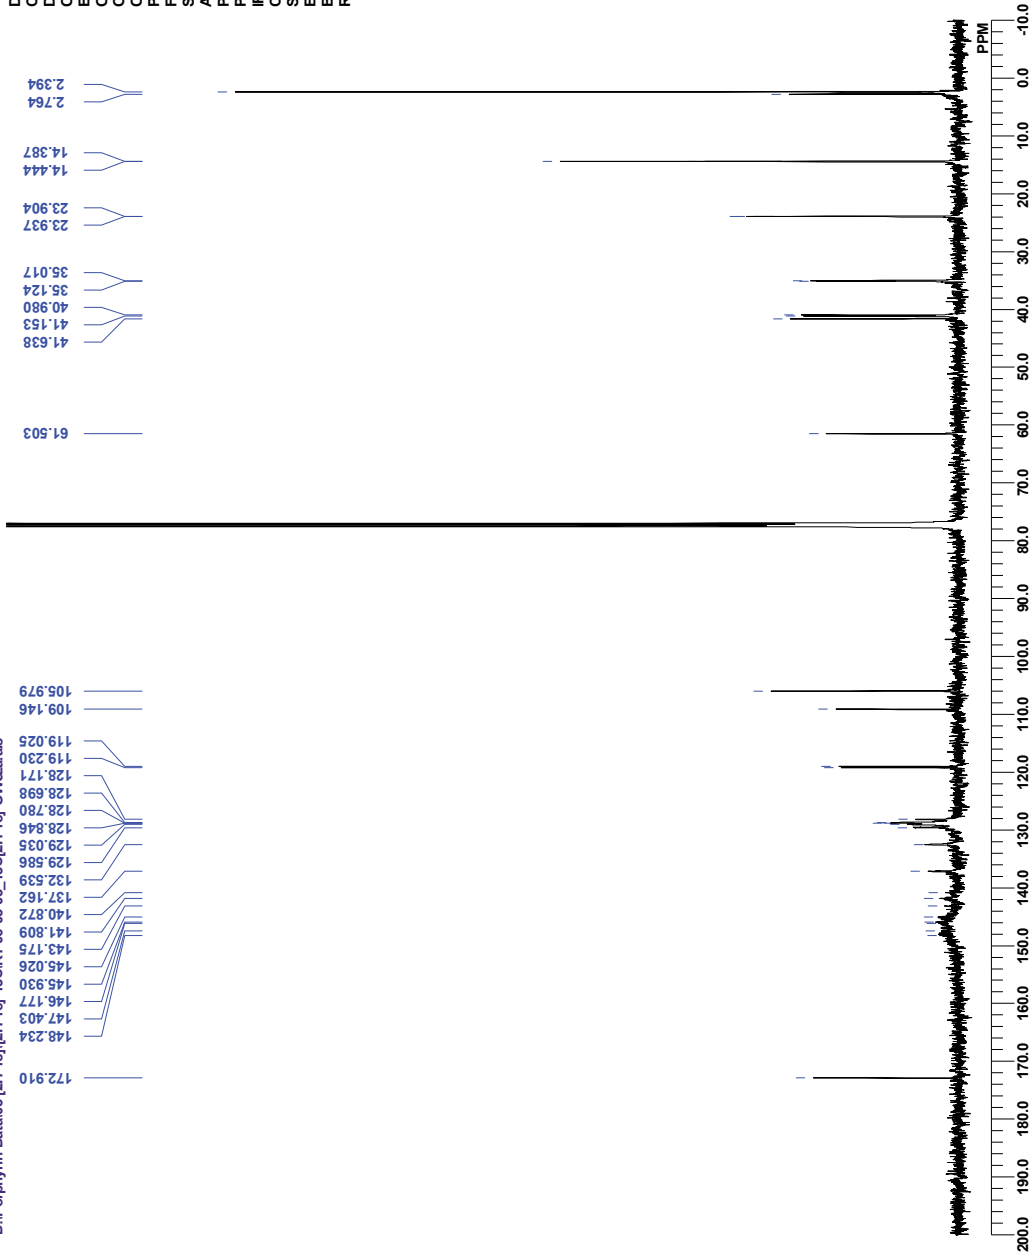

2H-1c

auto

D:\Porphyrin-Data\04 [2H-1d][2H-1d]-1HDBP-BbetaSi(2H)1F400-OWCE1H1.a1s

DFILE DBP-BbetaSi(2H)1F400-OWCE1H1.a1s  
 COUNT auto  
 DATIM Fri Dec 07 19:23:36 2018  
 1H  
 CBNUC NON  
 EXMOD  
 OBFREQ 398.65 MHz  
 OBSSET 124.00 KHz  
 OBFIN 10500.00 Hz  
 POINT 16384  
 FREQU 7992.01 Hz  
 SCANS 8  
 ACQTM 2.0500 sec  
 PD 4.9500 sec  
 PW1 5.80 usec  
 IRNUC 1H 21.7 c  
 CTEMP CDCL3  
 SLVNT 7.24 ppm  
 EXREF 1.20 Hz  
 BF 15  
 RGAIN

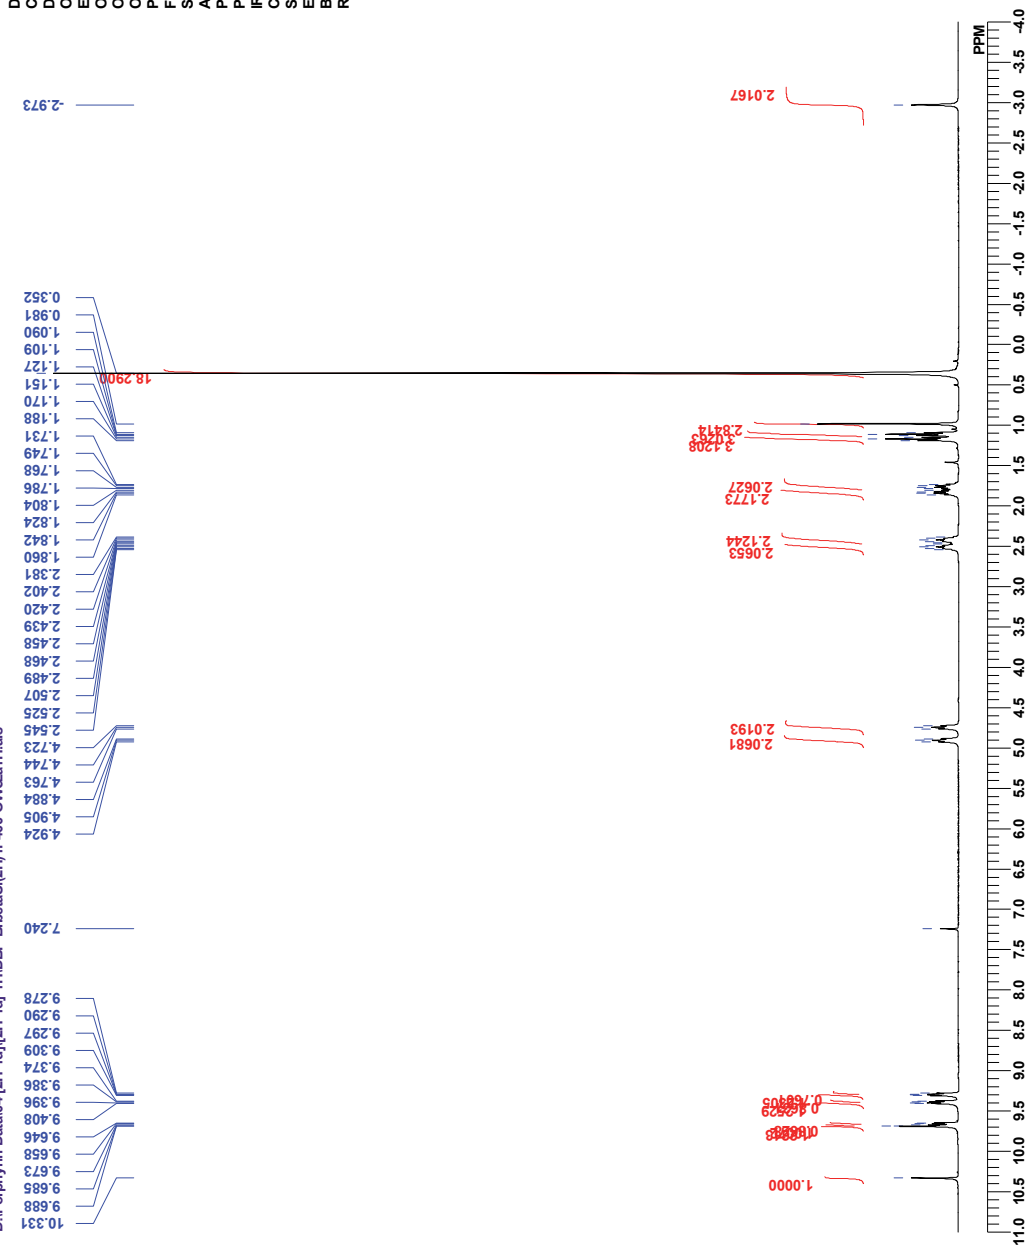

**2H-1d**

DBP-BrbetaSi(2H)1F40013C

D:\Porphyrin-Data\04 [2H-1d][2H-1d]-13C\DBP-BrbetaSi(2H)1F40013C2BCM1\_E1\*OWCE3.a1s

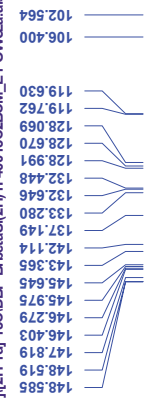

DBP-BrbetaSi(2H)1F40013C2BCM1\_E1\*OWCE3.a1s  
 DBP-BrbetaSi(2H)1F40013C  
 Mon Dec 10 08:00:56 2016  
 13C  
 BCM  
 EXMOD 100.40 MHz  
 OBFRQ 125.00 KHz  
 OBSET 10500.00 Hz  
 OBFIN 32768  
 POINT 27118.64 Hz  
 FREQU 32000  
 SCANS 1.2083 sec  
 ACQTM 1.7920 sec  
 PD 5.80 usec  
 PW1 1H  
 IRNUC 23.0 c  
 CTEMP CDCL3  
 SLVNT 77.10 ppm  
 EXREF BF 1.20 Hz  
 RGAIN 25

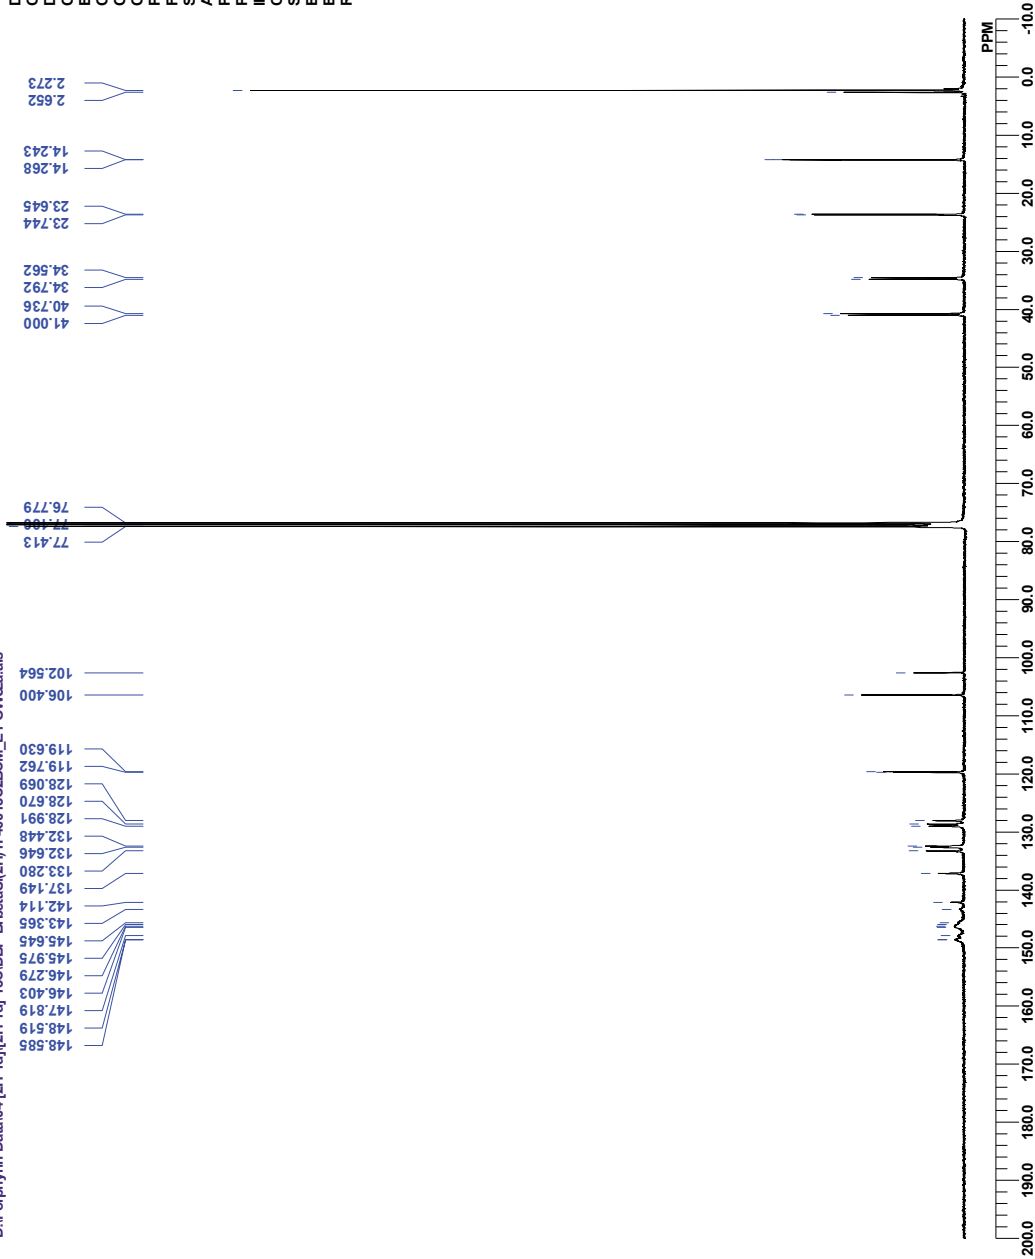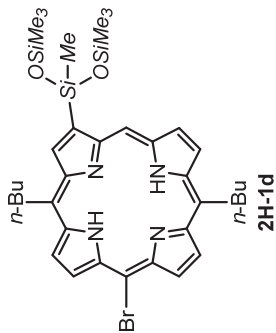

# 2H-1g

## RT-9-4DPP-Si(2H)

D:\Porphyrin-Data\06 [2H-1g]-1HRT-9-4DPP-Si(2H)\%d\CE3\1H.als

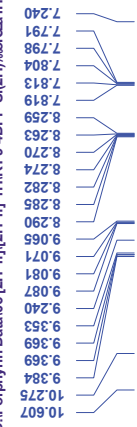

DFILE RT-9-4DPP-Si(2H)\%d\CE3\1H.als  
COMINT RT-9-4DPP-Si(2H)  
DATIM Fri Jul 27 16:52:59 2018  
1H  
EXMOD NON  
OBFRQ 300.40 MHz  
OBSET 130.00 KHz  
OBFIN 1150.00 Hz  
POINT 32768  
FREQU 6006.01 Hz  
SCANS 16  
ACQTM 5.4559 sec  
PD 1.5440 sec  
PW1 5.20 usec  
1H  
IRNUC 26.6 c  
CTEMP CDCL3  
SLVNT 7.24 ppm  
EXREF 0.09 Hz  
BF 17  
RGAIN

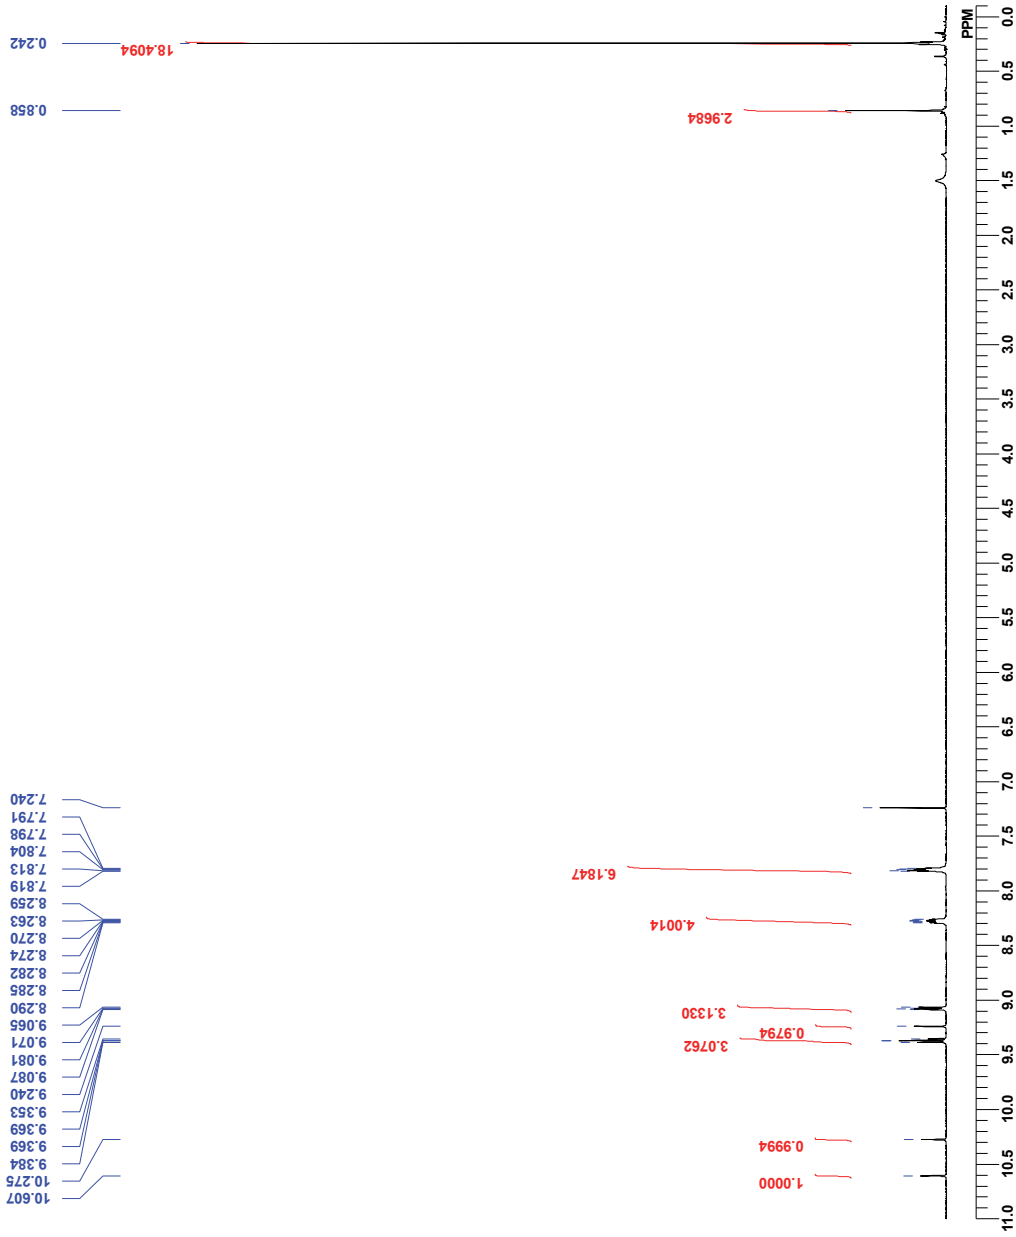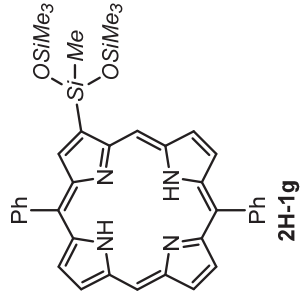



# 2H-1g

single pulse decoupled gated NOE

D:\Porphyrin-Data\06 [2H-1f][2H-1f]-13C\RT-9-4DPP-S(2H)\_E13C-1-1-OWCE\13C.als

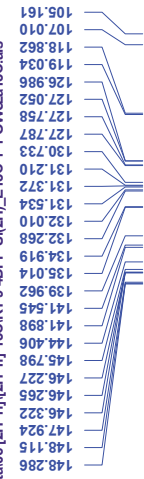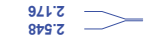

DFILE RT9-4DPP-S(2H)\_E13C-1-1-OWCE\13C.als  
COMINT single pulse decoupled gated NOE  
DATIMI 2016-07-29 10:40:18  
13C  
EXMOD single\_pulse\_dec  
OBFRQ 100.53 MHz  
OBSET 5.35 KHz  
OBFIN 5.86 Hz  
POINT 26214  
FREOU 25125.63 Hz  
SCANS 40000  
ACQTM 1.0433 sec  
PD 2.0000 sec  
PW1 3.60 usec  
IRNUC 1H  
CTEMP 23.6 c  
SLVNT CDCL3  
EXREF 77.10 ppm  
BF 0.09 Hz  
RGAIN 60

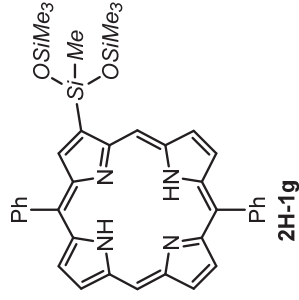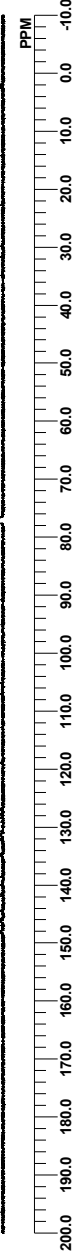

# Zn-1b

Zn-1b

F:\PopPhyrin-Data\_Editi07 [Zn-1b] [Zn-1b]-1HRT-6-13-2betaSimesoPh\_E1H-1-1\_j\_st\_edit\_OBC.als

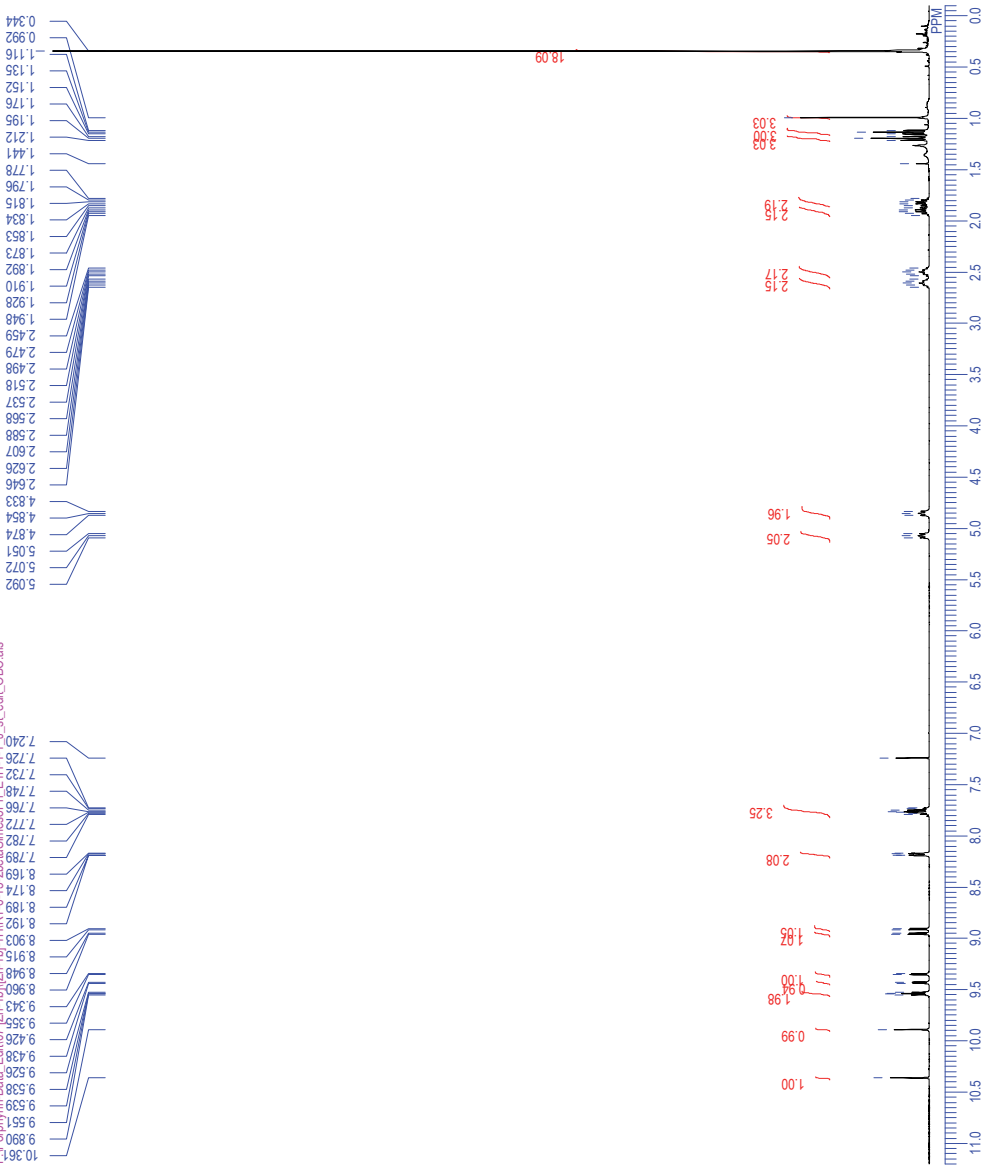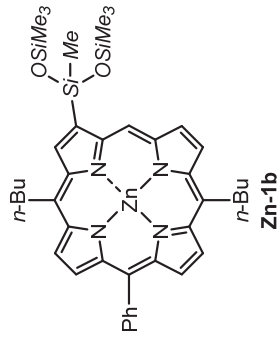

D:\FILE RT-6-13-2betaSimesoPh\_E1H-1-1\_j\_st\_edit\_OBC.als

COMPN Zn-1b

DATEM 2017-09-20 19:16:49

ORNUCH

EXM03single\_pulse.jp

OSFREQ 393.78 MHz

OSSET 4.19 KHz

OSBIN 7.29 Hz

POINT 26244

FREQ 800.00 Hz

SCANS 16

ACQTIME 3.2768 sec

PD 2.0000 sec

PWT 3.05 usec

IRNUCH

CTEMP 20.7 c

SLVITDCCL3

EXREF 7.24 ppm

BF 0.09 Hz

RGAIN 38

# Zn-1b

single pulse decoupled gated NOE

D:\Porphyrin-Dat07 [Zn-1b]-13CIRT-6-13-2betaSimesoPh\_E13C-1-1\*OWCE3a.als

DFILE RT-6-13-2betaSimesoPh\_E13C-1-1\*OWCE3a.als  
COMINT single pulse decoupled gated NOE  
DATIM 2017-09-20 19:19:60  
CENUC 13C  
EXMOD single\_pulse\_dec  
OBRFQ 100.53 MHz  
OBSET 5.35 KHz  
OBFIN 5.86 Hz  
POINT 26214  
FREQU 25125.63 Hz  
SCANS 18800  
ACQTM 1.0433 sec  
PD 1.7000 sec  
PW1 3.53 usec  
IRNUC 1H  
CTEMP 20.4 c  
SLWT CDCL3  
EXREF 77.10 ppm  
BF 0.09 Hz  
RGAIN 60

41.326  
41.068  
35.462  
35.185  
23.953  
23.858  
14.361  
14.342  
2.863  
2.291

152.596  
150.279  
150.260  
150.231  
149.869  
149.001  
148.982  
148.954  
143.281  
142.308  
138.732  
134.461  
132.220  
132.144  
132.125  
129.226  
128.588  
127.424  
126.490  
120.102  
120.073  
120.025  
106.715

77.424  
77.100  
76.785

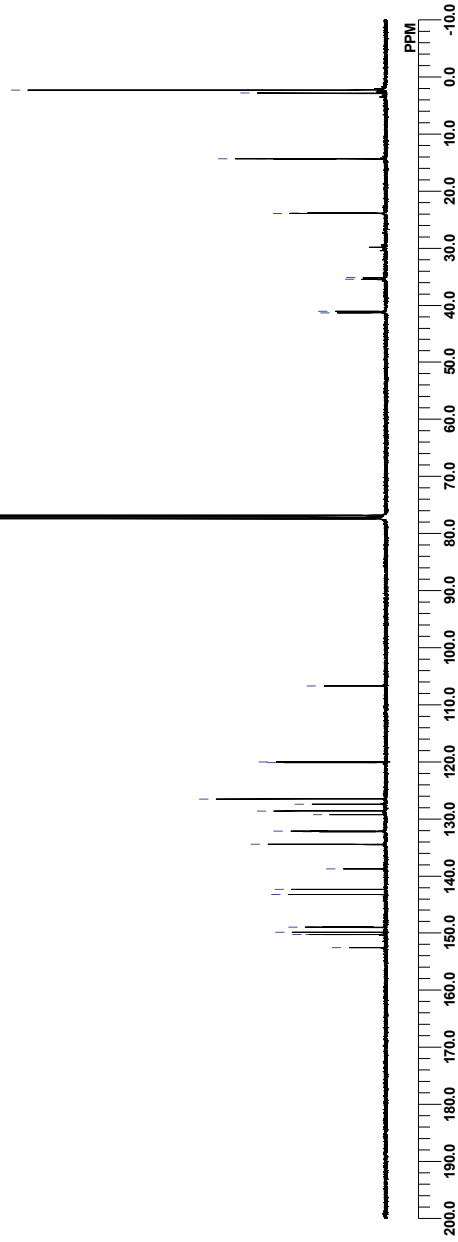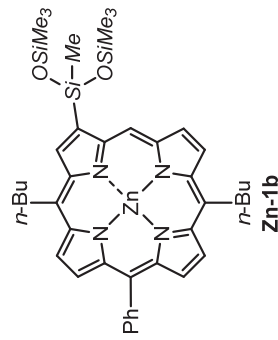

# Zn-1c

Zn-1c

F:\PopPhy\rimData\_Edit\05 [Zn-1c]-1HRT-jeiaSmesoCH2CO2Et(ZN)\_E1H-1-1\_OBC\_edit\_j\_st.xls

D:\FILE\_RT-jeiaSmesoCH2CO2Et(ZN)\_E1H-1-1\_OBC\_edit\_j\_st.xls

COMN/Zn-1c

DATE: 2017-09-14 20:36:53

EXMID: single\_pulse.jp

OBFRQ: 399.78 MHz

OBSET: 4.19 KHz

OBFIN: 7.29 Hz

POINT: 26214

FREQ: 8000.00 Hz

SCANS: 16

ACQTM: 3.2768 sec

PD: 2.0000 sec

PW1: 3.05 usec

IRNUC: 1H

CTEMP: 21.6 c

SUVTCDCL: 3

EXREF: 7.24 ppm

BF: 0.09 Hz

RGAIN: 38

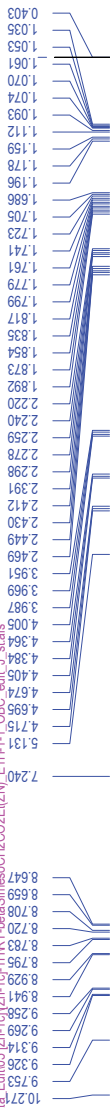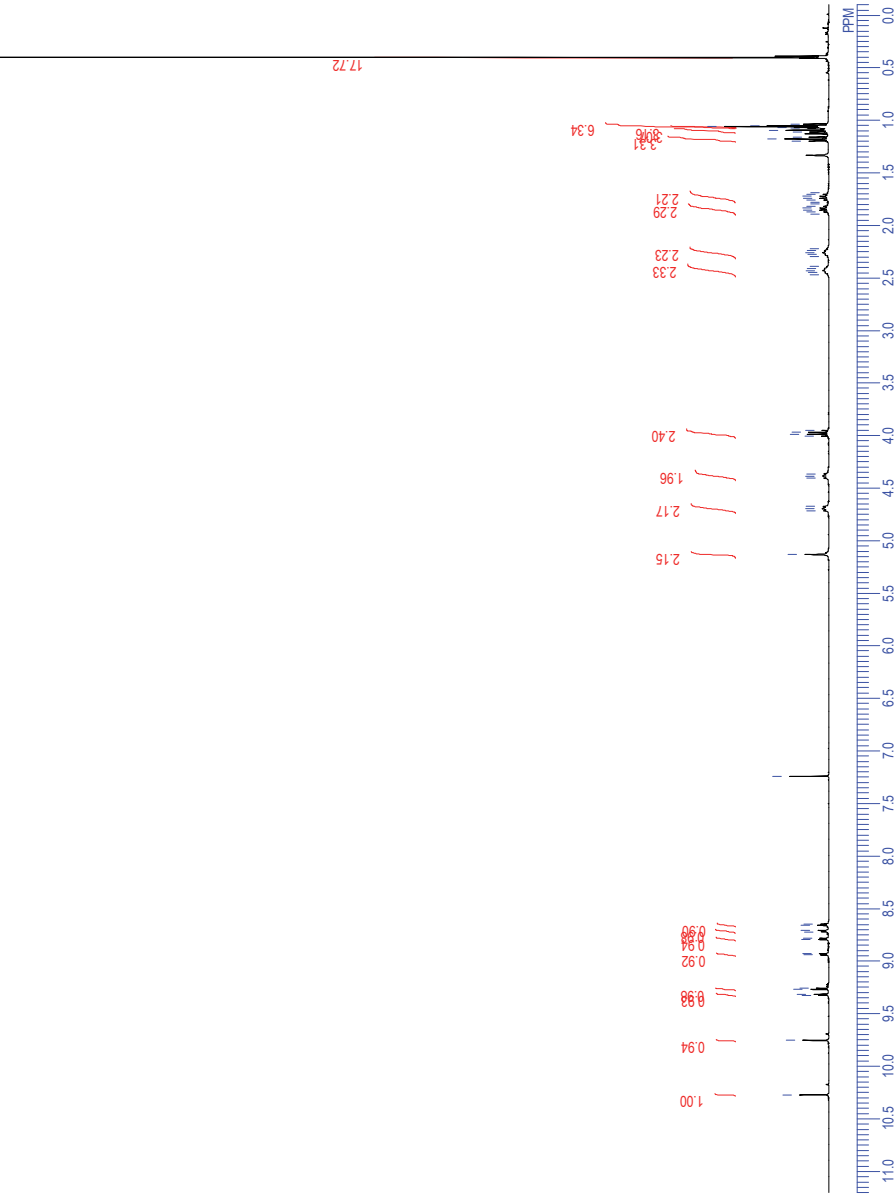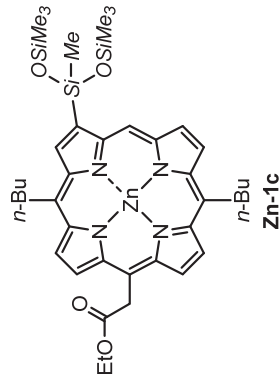

# Zn-1c

single pulse decoupled gated NOE

D:\Porphyrin-Data\05 [Zn-1c]\13C\RT-betaiaSiimesoCH2CO2Et(ZN)\_E13C-1-1-OWCEa.als

DFILE RT-betaSiimesoCH2CO2Et(ZN)\_E13C-1-1-OWCEa.als  
COMINT single pulse decoupled gated NOE  
DATIM 2017-09-14 20:39:48  
OBNUC 13C  
EXMOD single\_pulse\_dec  
OBRQ 100.53 MHz  
OBSFQ 5.35 KHz  
OBFIN 5.86 Hz  
POINT 26214  
FREQU 25125.63 Hz  
SCANS 18400  
ACQTM 1.0433 sec  
PD 1.7000 sec  
PWI 3.53 usec  
IRNUC 1H  
CTEMP 20.5 c  
SLVNT CDCL3  
EXREF 77.00 ppm  
BF 0.09 Hz  
RGAIN 60

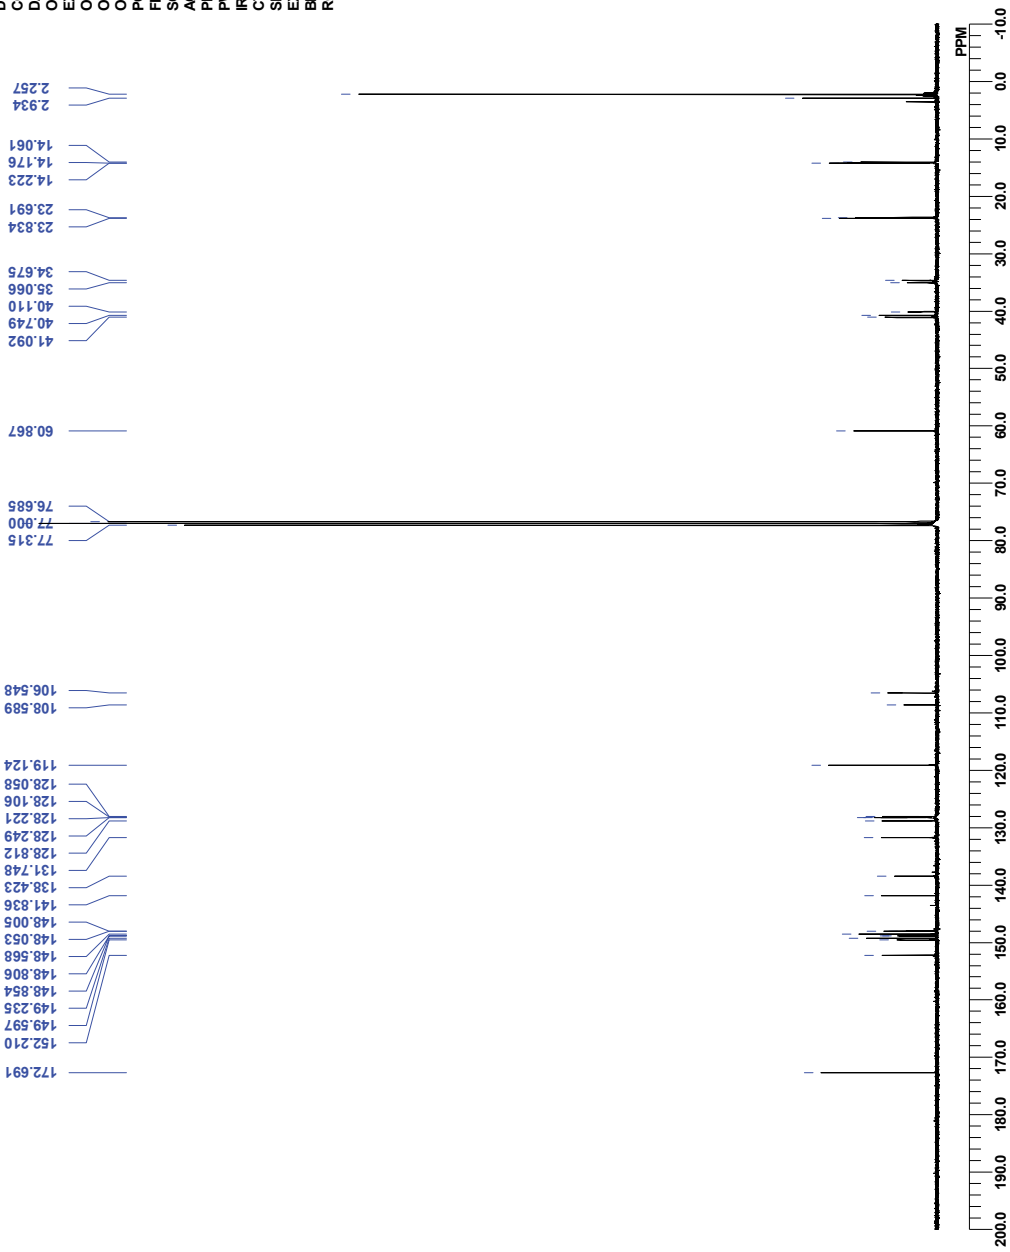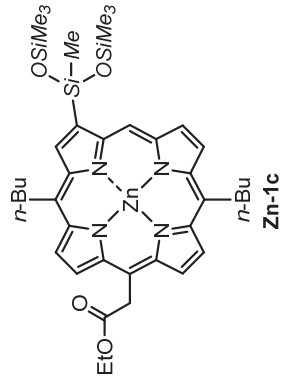

# Zn-1d

[Zn-1d] RT-12.6 DBP-BbetaSI(Zn)

F:\Porphyrin-Data\_Edhi\03 [Zn-1d]\Zn-1d-1HRT-12.6 DBP-BbetaSI(Zn)\_J\_st\_edt\_OBC.als

DFILE RT:12.6 DBP-BbetaSI(Zn)\_J\_st\_edt\_OBC.als  
 COMINT:1d RT:12.6 DBP-BbetaSI(Zn)  
 DATIM\_Sat Jan 26 16:20:25 2019

ORNUC/H  
 EXHACTION  
 OBPRQ 389.65 MHz  
 OBSSET 124.00 KHz  
 OBFIN 10500.00 Hz  
 POINT 16384  
 FREQU 7992.01 Hz  
 SCANS 8  
 ACQTM 2.0500 sec  
 PD 4.9500 sec  
 PW1 5.80 usec  
 IRNUC/H  
 CTEMP 22.9 c  
 SLVNT CDCL3  
 EXREF 7.24 ppm  
 BF 0.09 Hz  
 RGAIN 16

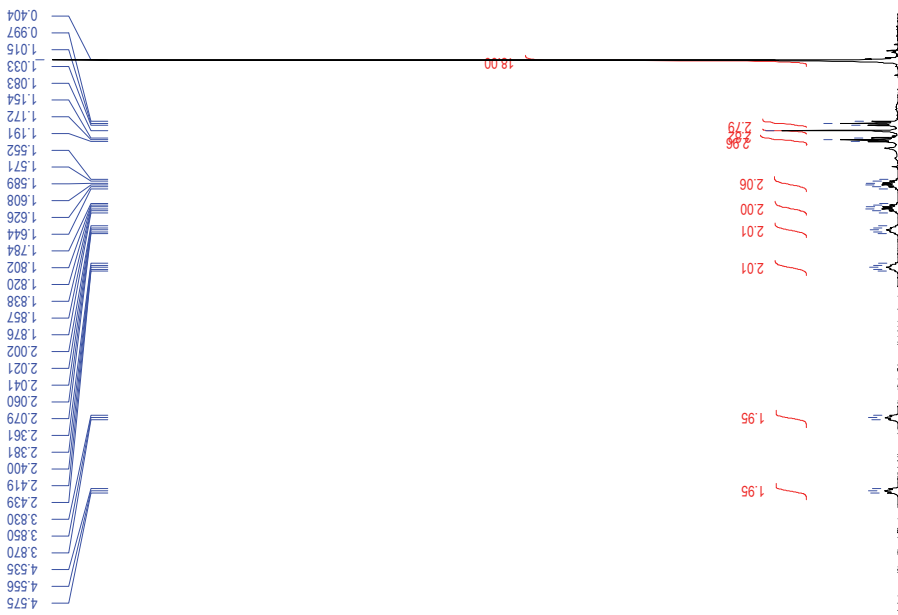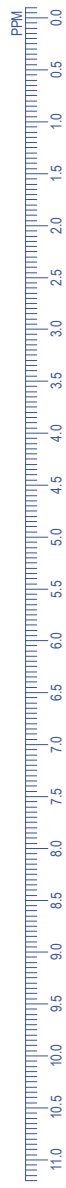

# Zn-1d

RT-12-6 DBP-BrbetaSi(Zn)13C

D:\Porphyrin-Data\08 [Zn-1d] [Zn-1d]-13C\RT-12-6 DBP-BrbetaSi(Zn)13C -OWCEa.als

DFILE RT-12-6 DBP-BrbetaSi(Zn)13C -OWCEa.als  
COMINT RT-12-6 DBP-BrbetaSi(Zn)13C  
DATIM Mon Jan 28 08:24:37 2019  
13C  
EXMOD BCM  
OBFREQ 100.40 MHz  
OBSSET 125.00 KHz  
OBFIN 10500.00 Hz  
POINT 32768  
FREQU 27118.64 Hz  
SCANS 48000  
ACQTM 1.2083 sec  
PD 1.7920 sec  
PWI 5.80 usec  
IRNUC 1H  
CTEMP 22.9 c  
SLVNT CDCL3  
EXREF 77.10 ppm  
BF 0.09 Hz  
RGAIN 25

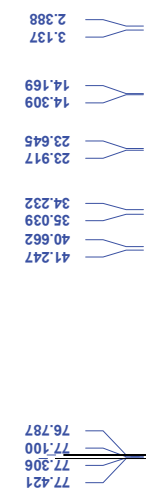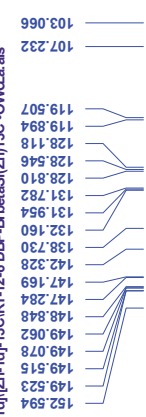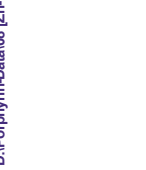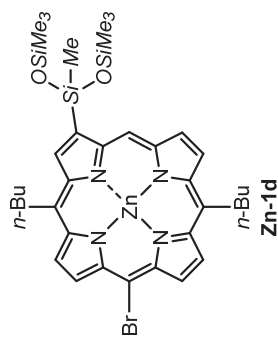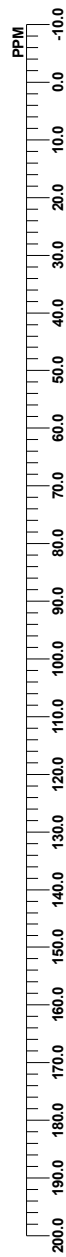

# Zn-1e

RT-7-38-DPP-BrbetaSi(Zn)

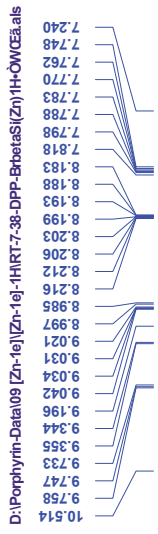

RT-7-38-DPP-BrbetaSi(Zn)1H-OWCEa.als  
RT-7-38-DPP-BrbetaSi(Zn)  
Sat Jun 16 14:31:48 2018

1H  
NON  
399.65 MHz  
124.00 KHz  
10500.00 Hz  
16384  
7992.01 Hz  
8  
2.0500 sec  
4.9500 sec  
5.80 usec  
1H  
24.7 c  
CDCL3  
7.24 ppm  
0.12 Hz  
19  
RGAIN

DFILE  
COMNT  
DATIMI  
OBNUC  
EXMOD  
OBFRQ  
OBSET  
OBFIN  
POINT  
FREOU  
SCANS  
ACQTM  
PD  
PW1  
IRNUC  
CTEMP  
SLVNT  
EXREF  
BF  
RGAIN

0.224  
0.233  
0.241  
0.251  
0.820  
1.294

18.3903  
3.4037

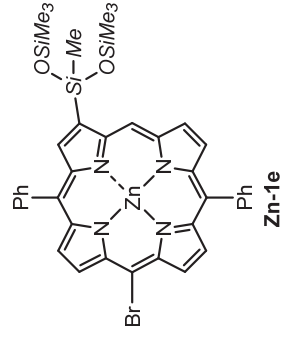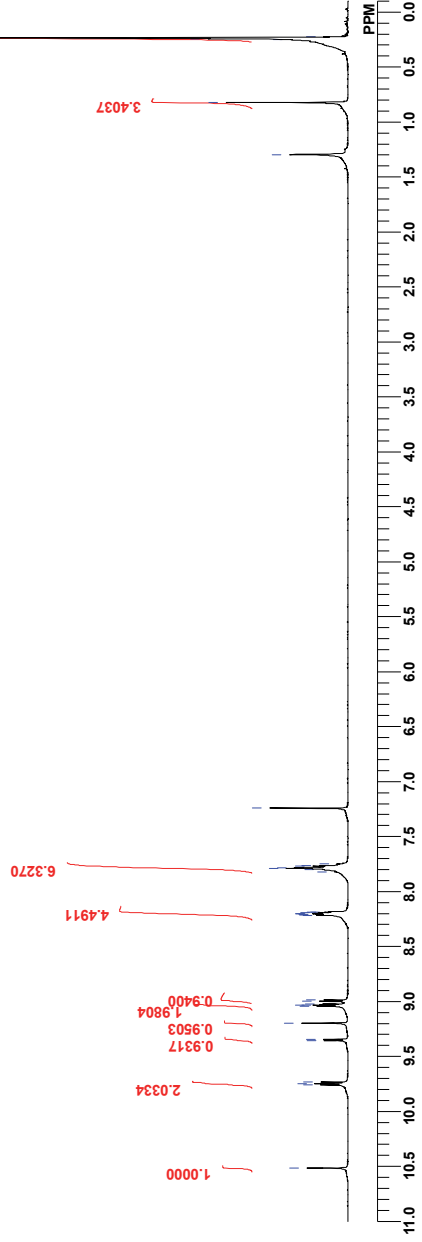



# Zn-1e

RT-7-38-DPP-BibetaSi(Zn)13C

D:\Porphyrin-Data\09 [Zn-1e]\13C\RT-7-38-DPP-BibetaSi(Zn)13C-OWCE3a.als

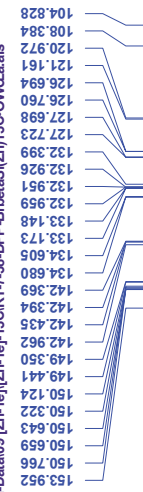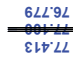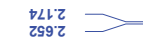

DFILE RT-7-38-DPP-BibetaSi(Zn)13C-OWCE3a.als  
COMNT RT-7-38-DPP-BibetaSi(Zn)13C  
DATIM Mon Jun 25 09:46:18 2018  
13C  
EXMOD BCM  
OBFREQ 100.40 MHz  
OBSSET 125.00 KHz  
OBFIN 10500.00 Hz  
POINT 32768  
FREQU 27118.64 Hz  
SCANS 48000  
ACQTM 1.2083 sec  
PD 1.7820 sec  
PWI 5.80 usec  
IRNUC 1H  
CTEMP 24.2 c  
SLVNT CDCL3  
EXREF 77.10 ppm  
BF 0.09 Hz  
RGAIN 25

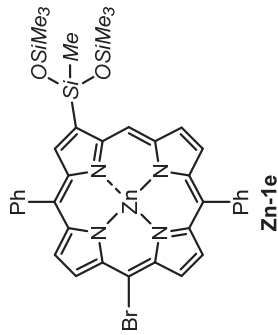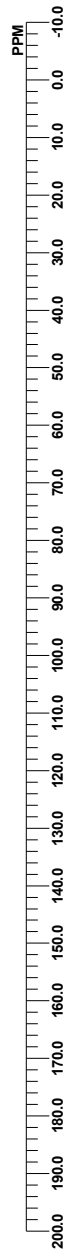

**Zn-1g**

RT-10-4DPP-Si(Zn)1F300

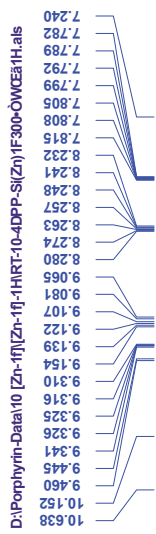

DFILE RT-10-4DPP-Si(Zn)1F300-OWCE31H.als  
 COMMENT RT-10-4DPP-Si(Zn)1F300  
 DATIM Tue Sep 18 17:46:42 2018  
 1H  
 EXMOD NON  
 OBFRQ 300.40 MHz  
 OBSSET 130.00 KHz  
 OBFIN 1150.00 Hz  
 POINT 32768  
 FREOU 6006.01 Hz  
 SCANS 16  
 ACQTM 5.4558 sec  
 PD 1.5440 sec  
 PW1 5.20 usec  
 1H  
 IRNUC 24.4 c  
 CTEMP CDCL3  
 SLVNT 7.24 ppm  
 EXREF 0.09 Hz  
 BF 15  
 RGAIN

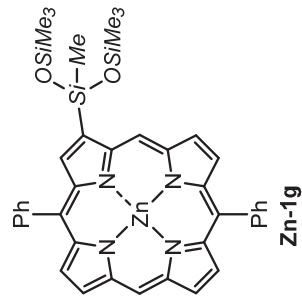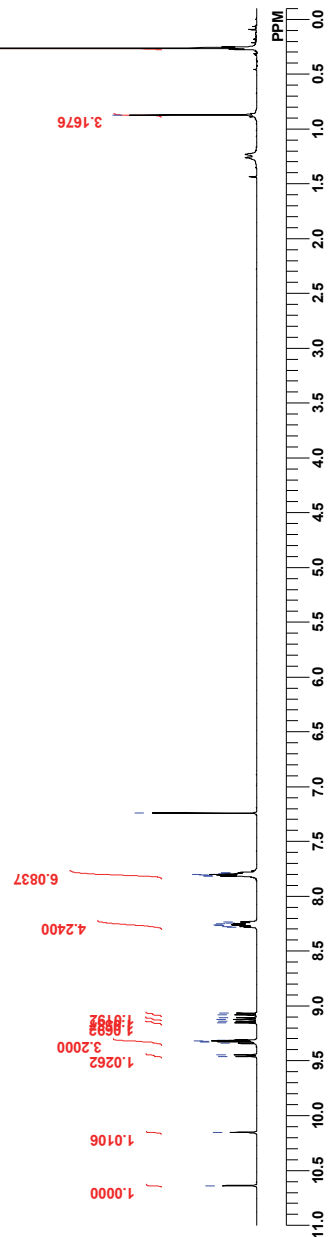

# Zn-1g

single pulse decoupled gated NOE

D:\Porphyrin-Data\10 [Zn-1H][Zn-1H]-13CIRT-10-4DPP-Si(Zn)\_E13C-1-1-OWCE8.als

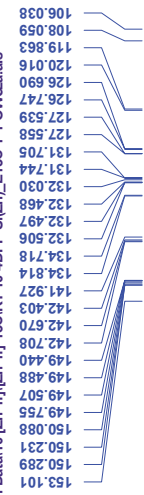

DFILE  
COMNT  
DATIM  
OBNUC  
EXMOD  
OBFREQ  
OBSSET  
OBFIN  
POINT  
FREQU  
SCANS  
ACQTM  
PD  
PW1  
IRNUC  
CTEMP  
SLVNT  
EXREF  
BF  
RGAIN

RT-10-4DPP-Si(Zn)\_E13C-1-1-OWCE8.als  
single pulse decoupled gated NOE  
2016-09-15 19:55:30  
13C  
single\_pulse\_dec  
100.53 MHz  
5.35 KHz  
5.86 Hz  
26214  
25125.63 Hz  
40000  
1.0433 sec  
2.0000 sec  
3.60 usec  
1H  
22.2 c  
CDCL3  
77.10 ppm  
0.12 Hz  
60

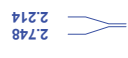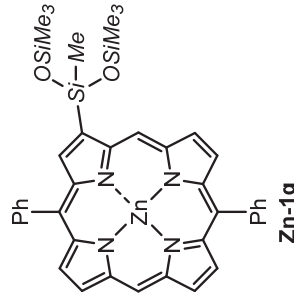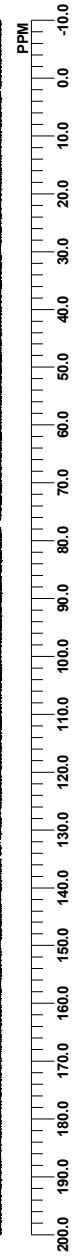

# 2H-2c

[2H-2c] RT12:13

F:\Porphyrin-Data\_Edith\1 [2H-2c] [2H-2c]-1H [2H-2c] RT:12:13-1H\_J\_st\_edit\_OBC.xls

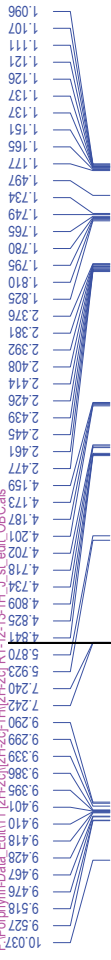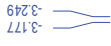

DFILE [2H-2c] RT:12:13-1H\_J\_st\_edit\_OBC.xls  
CONV[2H-2c] RT12:13  
DATEIMSat Feb 2 00:14:43 2019  
OBNUCH  
EXMCDIem  
OBFREQ 500.00 MHz  
OBSSET 160.00 KHz  
OBFIN 2160.00 Hz  
POINT 32768  
FREQU 10000.00 Hz  
SCANS 32  
ACQTM 3.2768 sec  
PD 3.7232 sec  
PW1 5.00 usec  
IRNUC1H  
CTEMP 27.3 C  
SLVNTCDCL3  
EXREF 7.24 ppm  
BF 0.30 Hz  
RGAIN 28

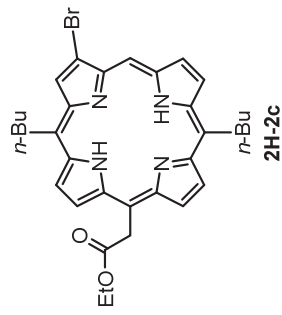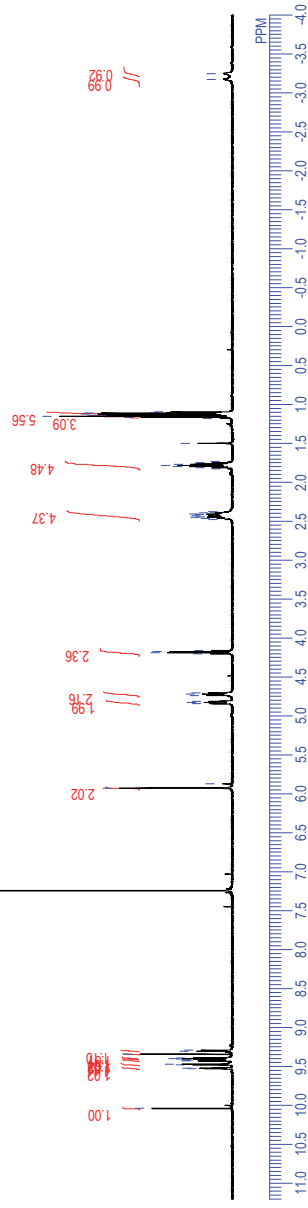

# 2H-2c

RT12-13

D:\Porphyrin-Data\11 [2H-2c]-13C\RT12-13\_13C-OWCE\data

DFILE RT12-13\_13C-OWCE\data  
COMINT RT12-13  
DATIM Sun Feb 3 09:36:11 2019  
CENUC 13C  
EXMOD bcm  
OBFREQ 125.65 MHz  
OBSSET 120.00 KHz  
OBFIN 7958.00 Hz  
POINT 32768  
FREQU 33898.30 Hz  
SCANS 40000  
ACQTM 0.9667 sec  
PD 2.0333 sec  
PWI 4.90 usec  
IRNUC 1H  
CTEMP 27.8 c  
SLVNT CDCL3  
EXREF 77.00 ppm  
BF 3.39 Hz  
RGAIN 30

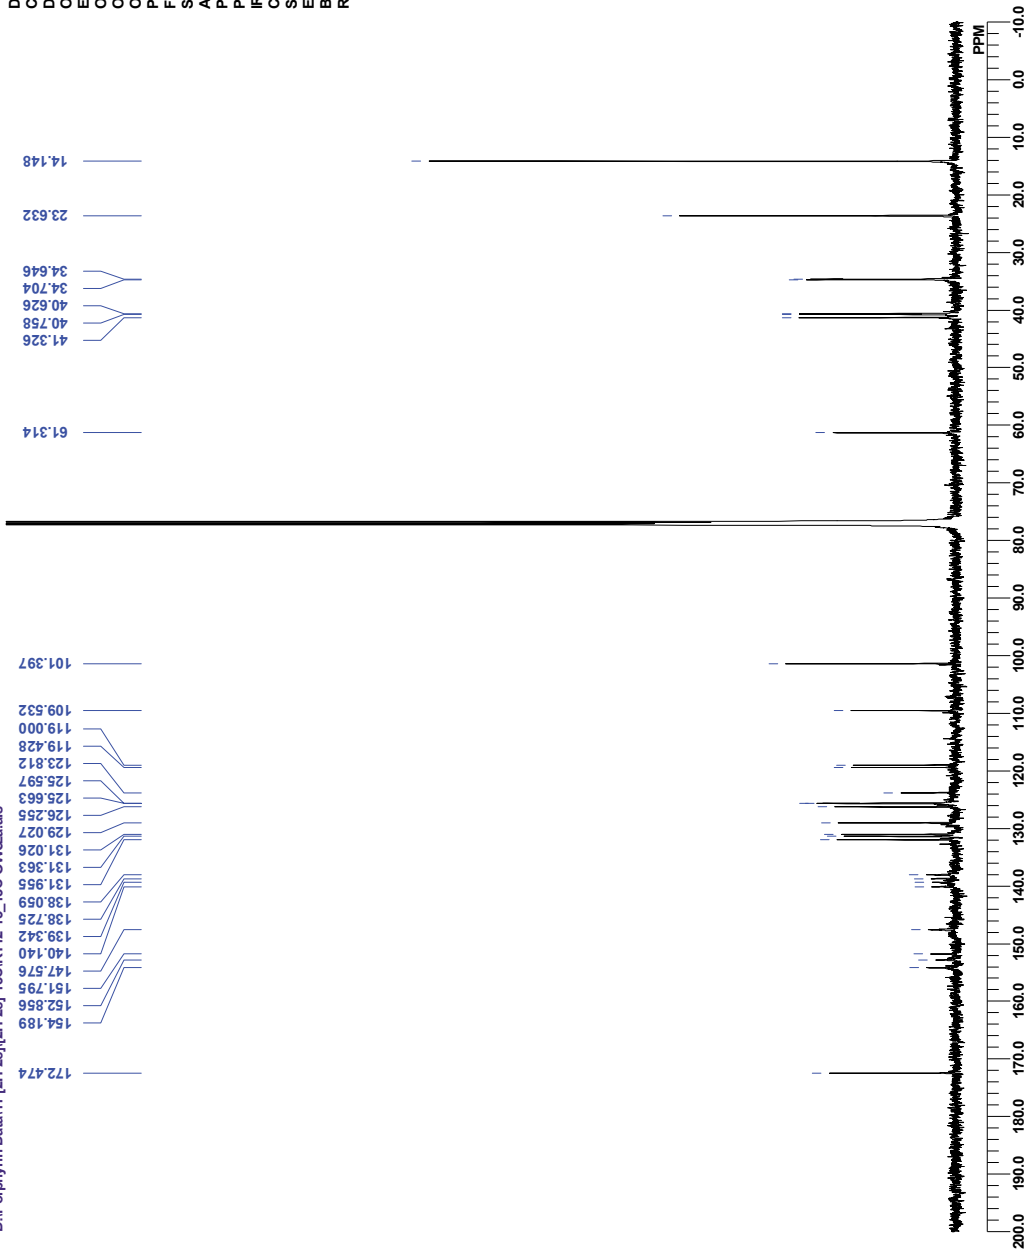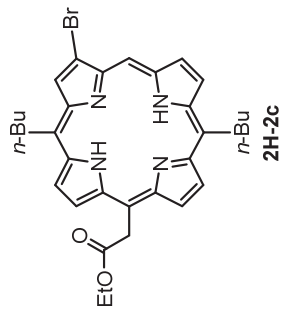

# 2H-2d

RT:1-36-2nd

F:\Porphyrin-Data\_Ecd\1\2 [2H-2d](2H-2d)-H1[2H-2d] RT:2-36-mesoBheiaB12nd\_J st. edit\_ OBC.als

DFILE [2H-2d] RT:2-36-mesoBheiaB12nd\_J st. edit\_ OBC.als  
CONV RT:1-36-2nd  
DATIM Tue Dec 06 17:16:23 2016  
EXMCH  
EXMCHON  
OBREQ 300.40 MHz  
OBSET 130.00 MHz  
OBRIN 1180.00 Hz  
POINT -32768  
FREQU 6006.01 Hz  
SCANS 16  
ACQTM 5.4559 sec  
PD 1.5440 sec  
PWI 5.60 usec  
IRNUC 1H  
CTEMP 25.2 c  
SLVNT CDCl3  
EXREF 7.24 ppm  
BF 0.09 Hz  
RGAIN 24

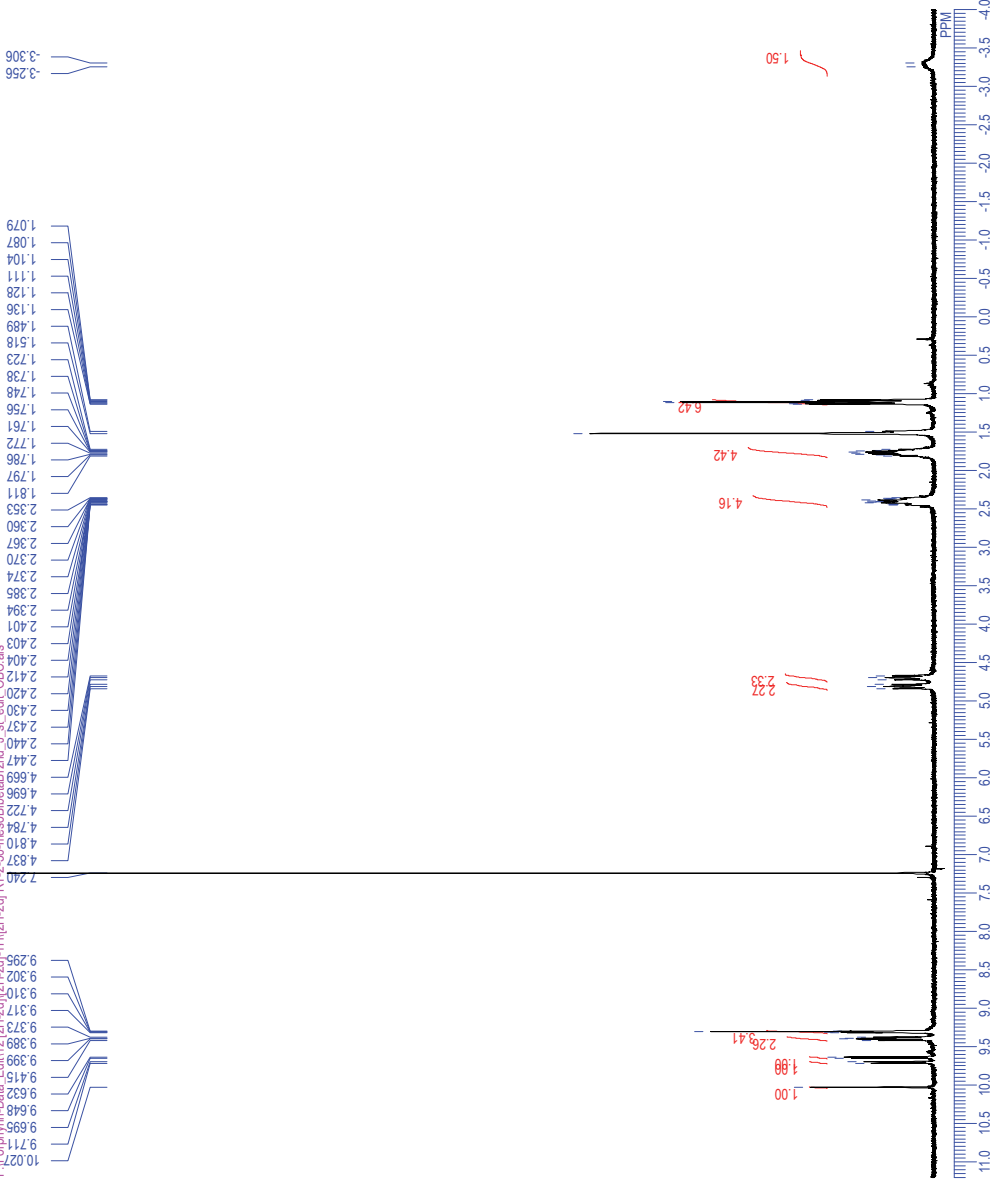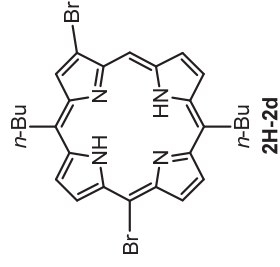

# 2H-2d

RT-DBP-BrbetaBr(2H)-13C-1

D:\Porphyrin-Data\12 [2H-2d][2H-2d]-13C[RT-DBP-BrbetaBr(2H)-13C-1%]d[CE]a.als

DFILE RT-DBP-BrbetaBr(2H)-13C-1%[CE]a.als  
COMINT RT-DBP-BrbetaBr(2H)-13C-1  
DATIM Tue Feb 12 09:07:43 2019  
13C  
OBNUC BCIN  
EXMDD  
OBRPQ 100.40 MHz  
OBSET 125.00 KHz  
OBFIN 10500.00 Hz  
POINT 32768  
FREQU 27118.54 Hz  
SCANS 52000  
ACQTM 1.2083 sec  
PD 1.7920 sec  
PW1 5.80 usec  
IRNUC 1H  
CTEMP 23.0 c  
SLVNT CDCL3  
EXREF 77.00 ppm  
BF 3.02 Hz  
RGAIN 25

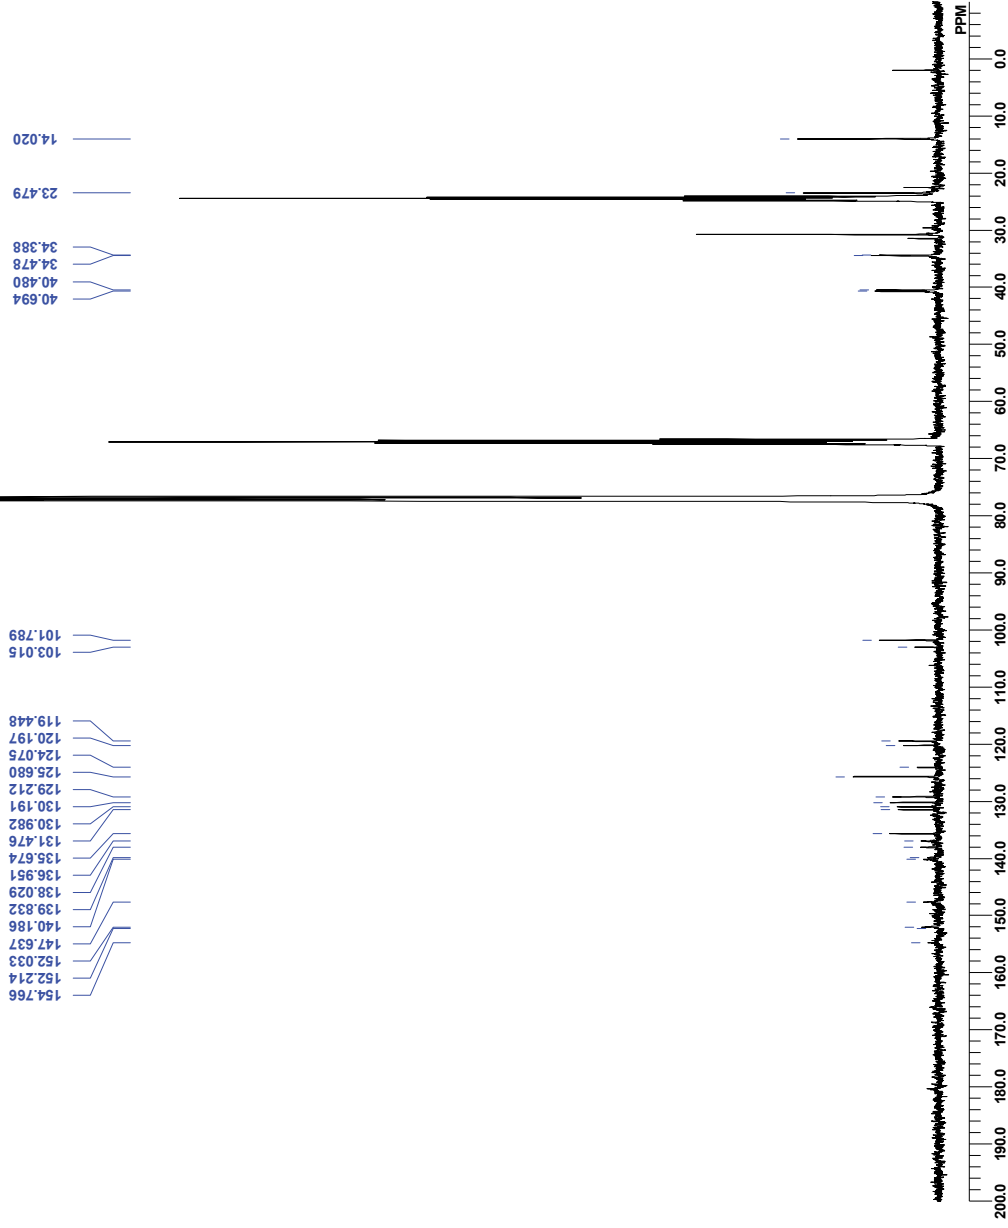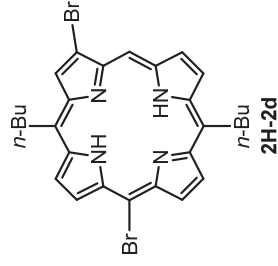

2H-2e

RT-8-10-DPP-BrbetaBr(2H)  
 D:\Porphyrin-Dat\13 [2H-2e]-1\RT-8-10-DPP-BrbetaBr(2H)-OWCE3.a1s

DFILE RT-8-10-DPP-BrbetaBr(2H)-OWCE3.a1s  
 COMNT RT-8-10-DPP-BrbetaBr(2H)  
 DATIM Sat Jun 16 15:05:04 2018  
 1H  
 NON  
 EXMOD  
 OBFRQ 399.65 MHz  
 OBSRT 124.00 KHz  
 OBFIN 10500.00 Hz  
 POINT 16384  
 FREQU 7992.01 Hz  
 SCANS 8  
 ACQTM 2.0500 sec  
 PD 4.9500 sec  
 PW1 5.80 ussec  
 1H  
 IRNUC 24.2 c  
 CTEMP CDCL3  
 SLWT 7.24 ppm  
 EXREF 0.12 Hz  
 BF 23  
 RGAIN

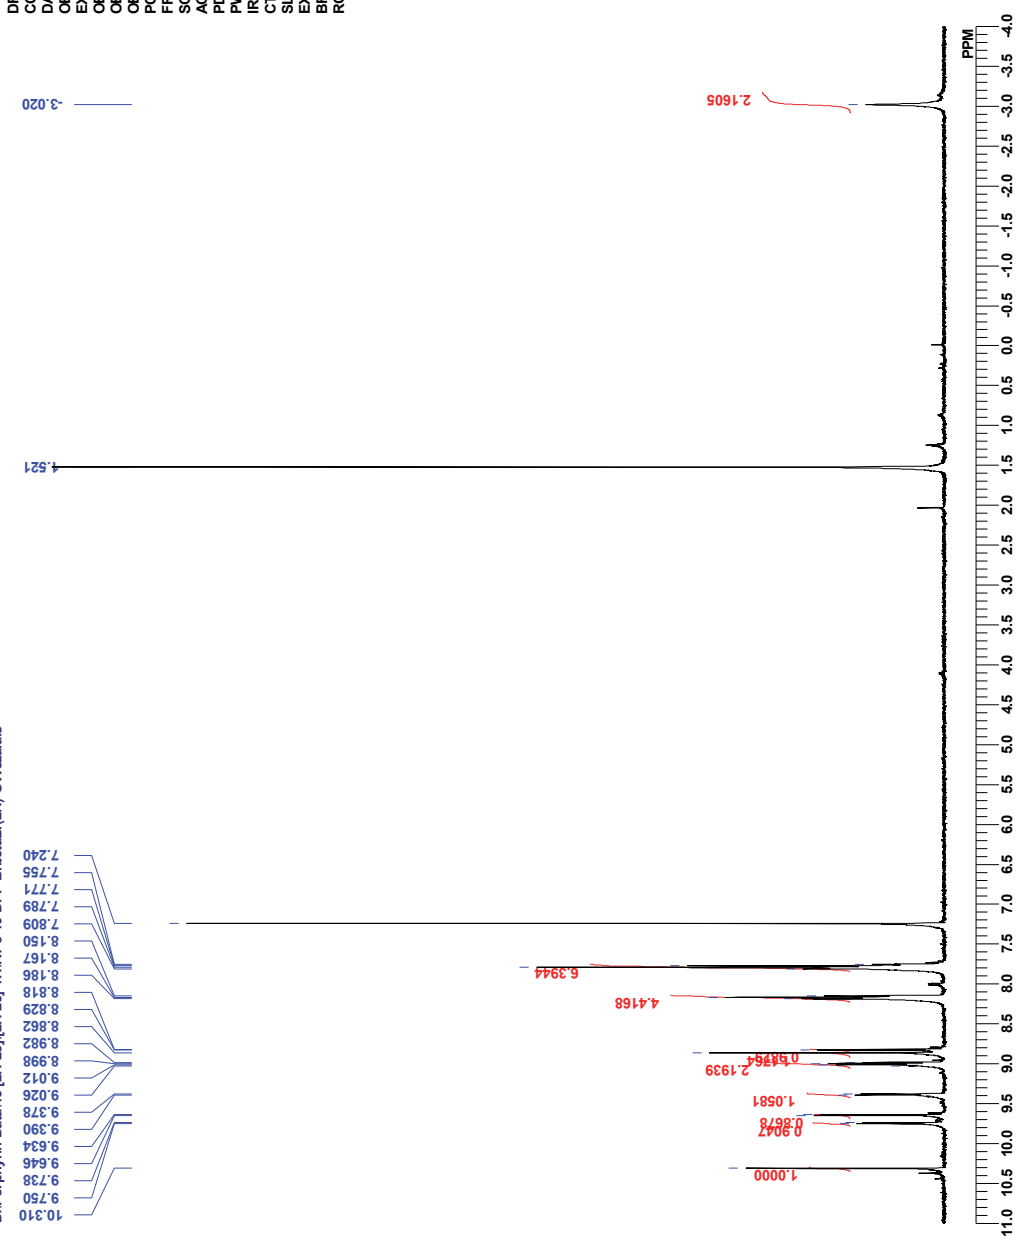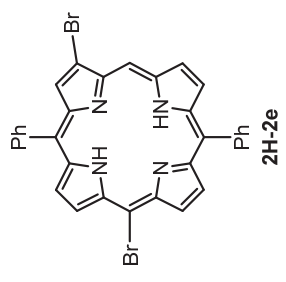



2H-2e

single pulse decoupled gated NOE

D:\Porphyrin-Data\13 [2H-2e][2H-2e][13C-1-1% d]CE3.a1s

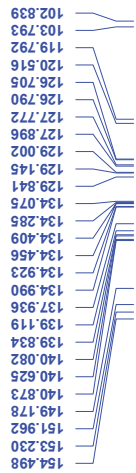

DFILE RTDPP-Br2eBr(2H)\_E13C-1-1% d(CE3.a1s  
COMINT single pulse decoupled gated NOE  
DATIM 2019-02-09 16:49:30  
13C  
EXMOD single\_pulse\_dec  
100.53 MHz  
OBFREQ 5.35 KHz  
OBSSET 5.86 Hz  
OBFIN 26214  
POINT 24222  
FREQU 25125.63 Hz  
SCANS 24222  
ACQTM 1.0433 sec  
PD 2.0000 sec  
PWI 3.60 usec  
1H  
IRNUC 23.4 c  
CTEMP CDCL3  
SLVNT 77.00 ppm  
EXREF 1.32 Hz  
BF 60  
RGAIN

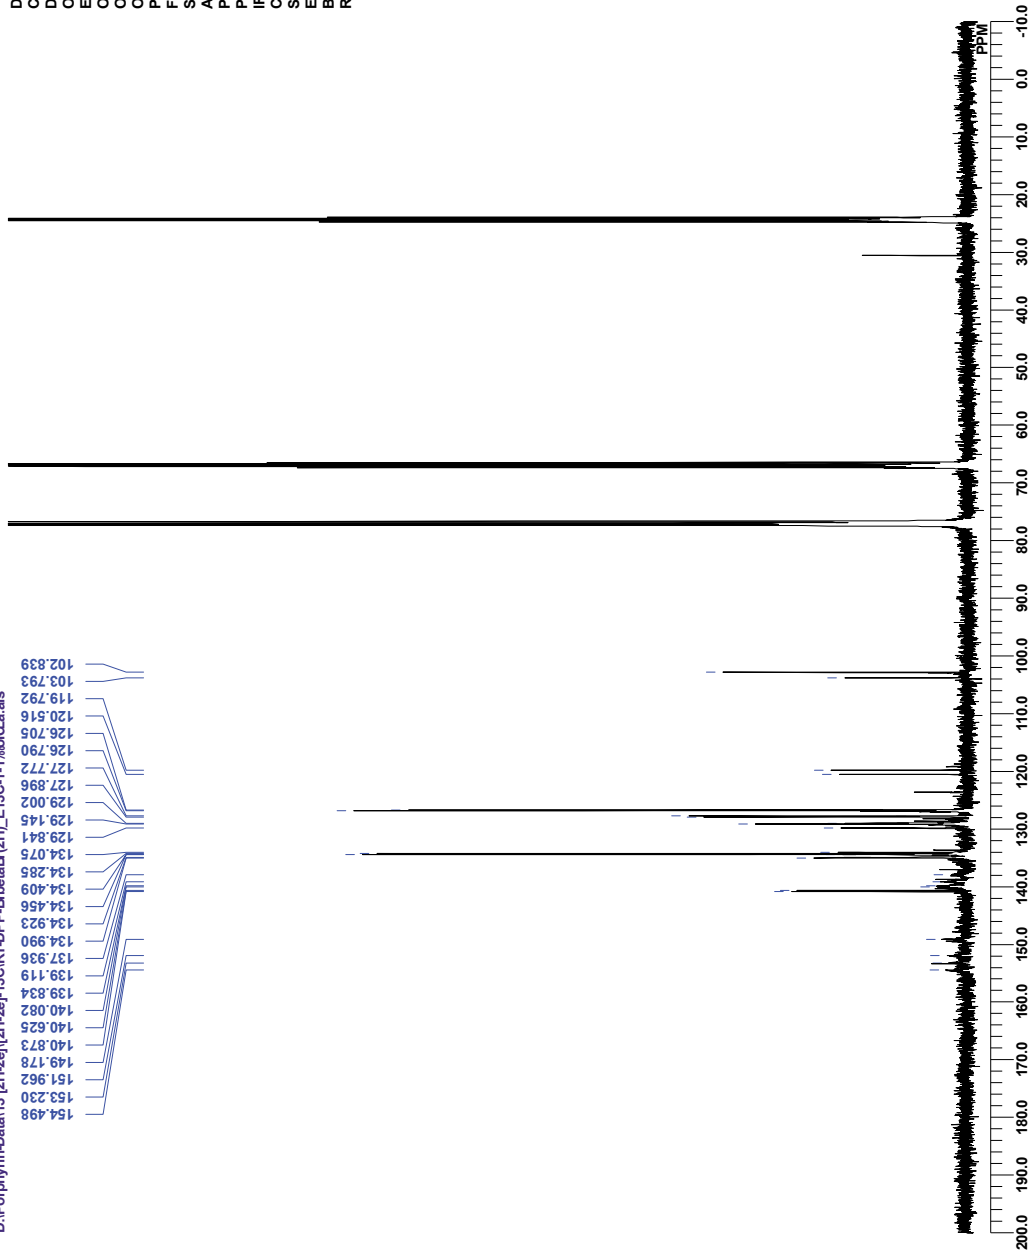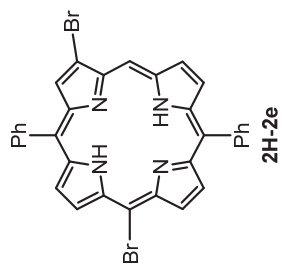

**Zn-3a**

D:\Porphyrin-Data\14 [Zn-3a]\1HIRT-7-36betaSiimesoBrTPP(Zn)1H-OWCEa.als

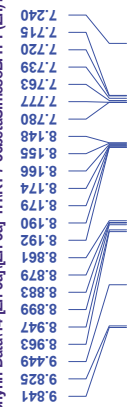

RT-7-36betaSiimesoBrTPP(Zn)1H-OWCEa.als

Tue May 15 17:27:43 2018

DFILE  
COMINT  
DATIM  
EXMOD  
OBSFREQ  
OBSFSET  
POINT  
FREQU  
SCANS  
ACQTIM  
PD  
PWI  
IRNUC  
CTEMP  
SLVNT  
EXREF  
BF  
RGAIN

1H  
NON  
300.40 MHz  
130.00 KHz  
1150.00 Hz  
32768  
6006.01 Hz  
16  
5.4659 sec  
1.5440 sec  
5.20 usec  
1H  
25.8 c  
CDCL3  
7.24 ppm  
0.09 Hz  
16

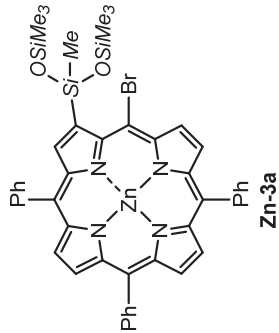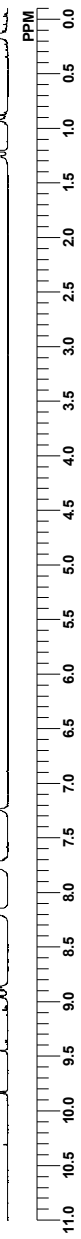

Zn-3a

RT-7-36betaSimesoBrTPP(Zn)13C

D:\Porphyrin-Data\14 [Zn-3a][Zn-3a]13C\RT-7-36betaSimesoBrTPP(Zn)13C-OWCE3a1s

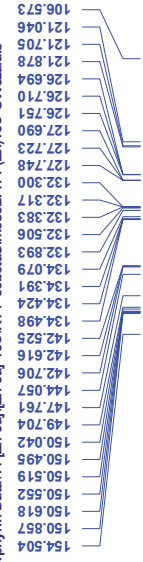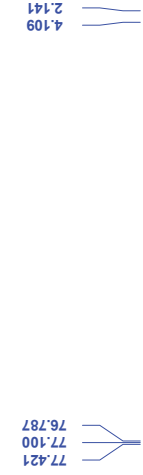

DFILE RT-7-36betaSimesoBrTPP(Zn)13C-OWCE3a1s  
 COMINT RT-7-36betaSimesoBrTPP(Zn)13C  
 DATIM Mon May 21 09:47:43 2018  
 13C  
 EXMOD BCMI  
 OBFRQ 100.40 MHz  
 OBSSET 125.00 KHz  
 OBFIN 10500.00 Hz  
 POINT 32768  
 FREQU 27118.64 Hz  
 SCANS 53600  
 ACQTM 1.2083 sec  
 PD 1.7820 sec  
 PW1 5.80 usec  
 IRNUC 1H  
 CTEMP 24.6 c  
 SLVNT CDCL3  
 EXREF 77.10 ppm  
 BF 0.09 Hz  
 RGAIN 25

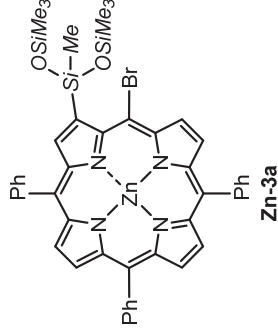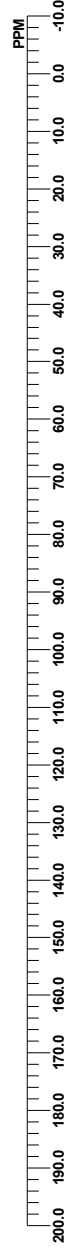

**Zn-3b**

RT-6-35(P)betaSbetaBr(Zn)

F:\Porphyrin-Data\_Eg\15[Zn-3b][Zn-3b]-H[H(Zn-3b)] RT-6-35(P)betaSbetaBr(Zn)-H\_J\_st\_edit\_OBC.als

DFILE Zn-3b)RT-6-35(P)betaSbetaBr(Zn)-H\_J\_st\_edit\_OBC.als  
 COM1 RT-6-35(P)betaSbetaBr(Zn)  
 DAT1 Tue Oct 24 19:28:10 2017

EXMORION  
 OBSFQ 309.65 MHz  
 OBSF2 124.00 KHz  
 OBSF1 10500.00 Hz  
 POINT 16364  
 FREQJ 7992.01 Hz  
 SCANS 16  
 ACQTM 20500 sec  
 PD 49500 usec  
 PW1 5.60 usec  
 IRNUC TH  
 CTEMP 25.1 c  
 SLVNTDCL3  
 EXREF 7.24 ppm  
 BF 0.09 Hz  
 RGAIN 17

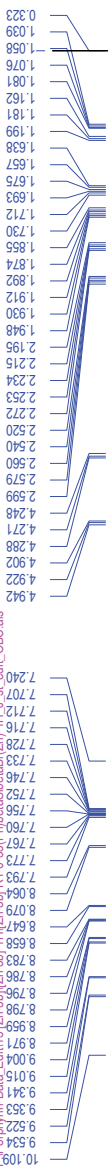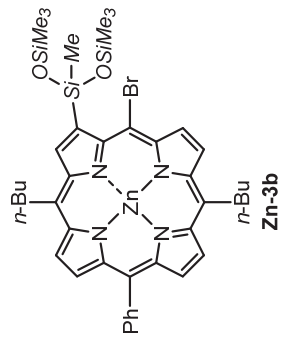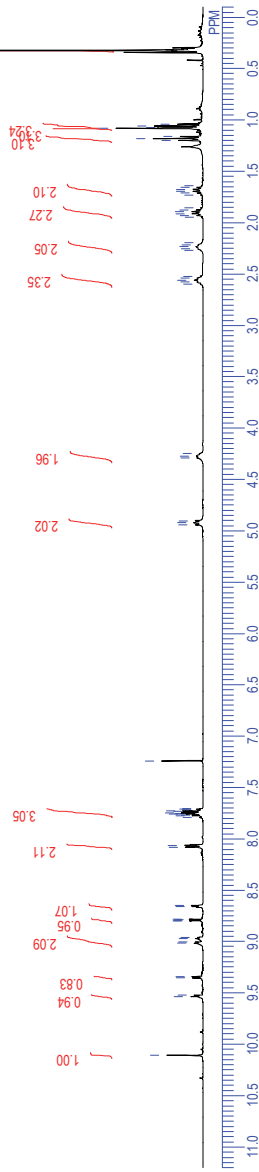

Zn-3b

RT-6-35(Ph)betaSibetaBr(Zn)

D:\Porphyrin-Data\15 [Zn-3b]-13C\RT-6-35(Ph)betaSibetaBr(Zn)-13C-OWCEa.a15

DFILE RT-6-35(Ph)betaSibetaBr(Zn)-13C-OWCEa.a15

COMINT RT-6-35(Ph)betaSibetaBr(Zn)

DATIM Wed Oct 25 10:33:14 2017

ORNUC 13C

EXMOD BCM

OBFREQ 100.40 MHz

OBSET 125.00 KHz

OBFIN 10500.00 Hz

POINT 32768

FREQ 27118.64 Hz

SCANS 18000

ACQTM 1.2083 sec

PD 1.7820 sec

PW1 5.80 usec

IRNUC 1H

CTEMP 24.9 c

SLVNT CDCL3

EXREF 77.10 ppm

BF 0.09 Hz

RGAIN 25

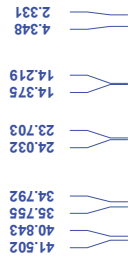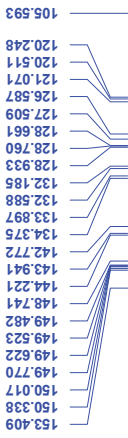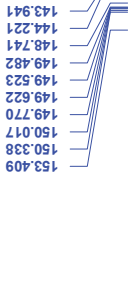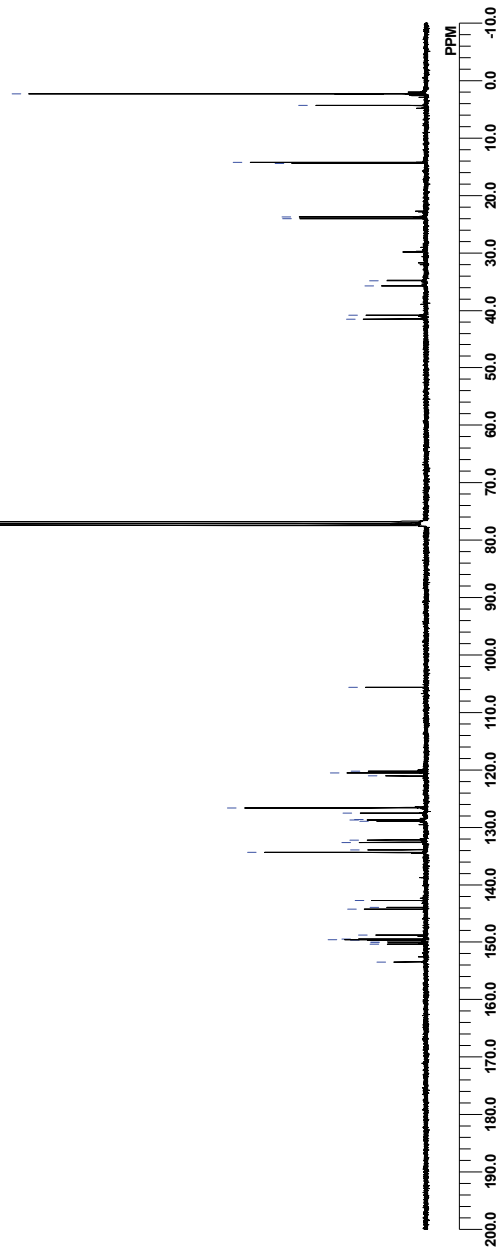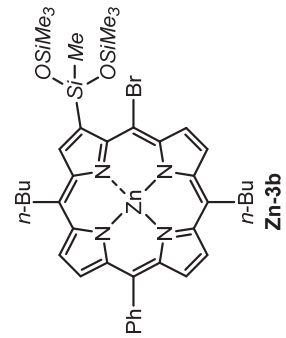

Zn-3c

Zn-3c

F:\Porphyrin-Data\_EdM\16[Zn-3c][Zn-3c]-1H[Zn-3c]RT-6-21-2-02\_1H\_J\_st.edt\_OBC.als

DFILE [Zn-3c] RT-6-21-2-02\_1H\_J\_st.edt\_OBC.als  
 CONV Zn-3c  
 DATIM Tue Sep 19 08:58:32 2017  
 EXNUC1H  
 EXNUC2H  
 OBFRQ 500.00 MHz  
 OBSET 160.00 KHz  
 OBFIN 2160.00 Hz  
 POINT 32768  
 FREQU 10000.00 Hz  
 SCANS 8  
 ACQTM 3.2768 sec  
 PD 3.7232 sec  
 PWM 5.00 usec  
 IRNUC1H  
 CTEMP 28.6 c  
 SLVNTCDCL3  
 EXREF 7.24 ppm  
 BF 0.09 Hz  
 RGAIN 20

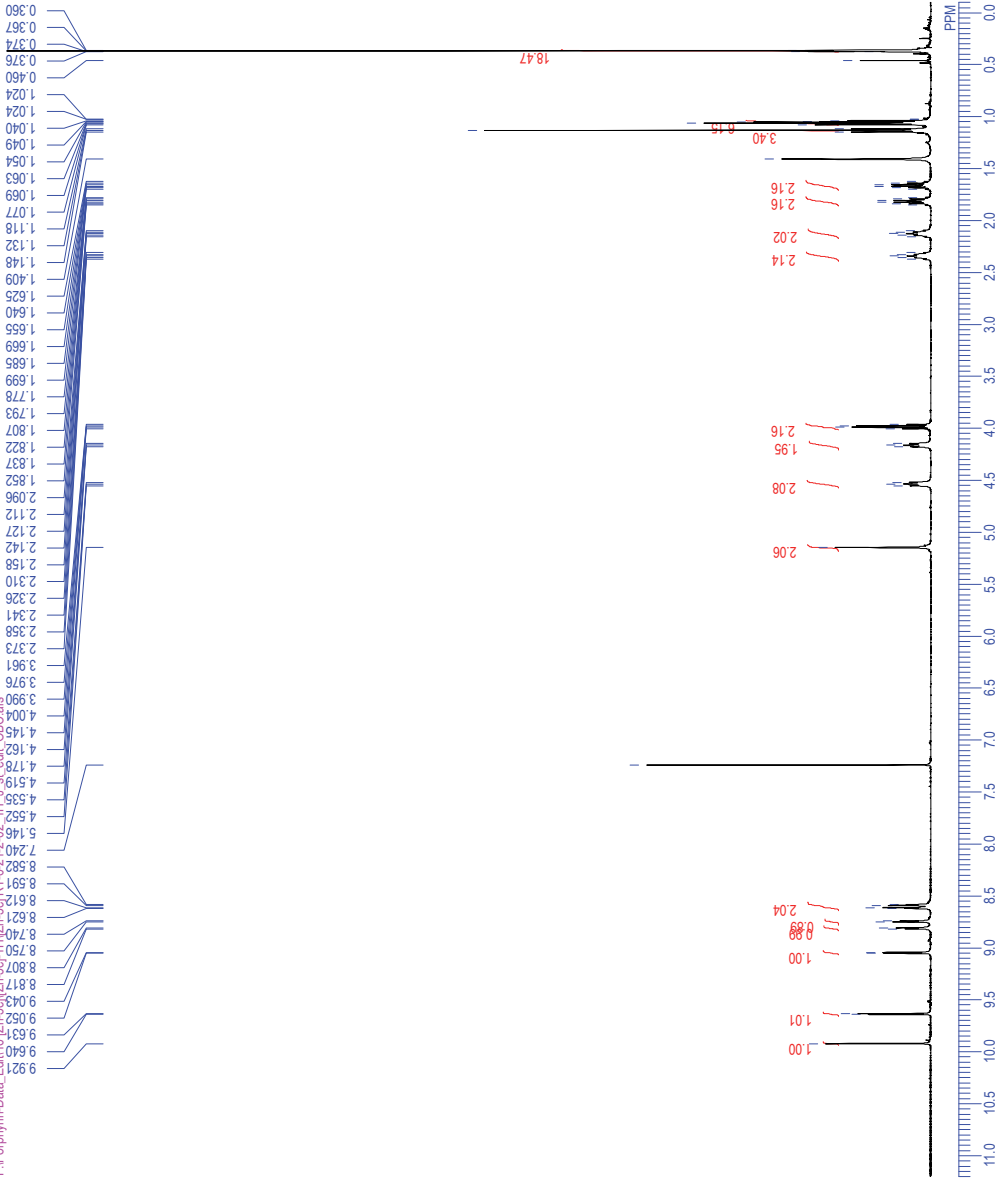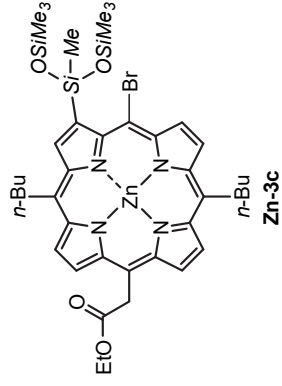

# Zn-3c

bcim

D:\Porphyrin-Data\16 [Zn-3c]-13CIRT-6-21-2-02\_13C-OWCEa.als

D:\Porphyrin-Data\16 [Zn-3c]-13CIRT-6-21-2-02\_13C-OWCEa.als  
COMINT bcim  
DATEM Tue Sep 19 21:34:37 2017  
OBNUC 13C  
EXMOD bcim  
OBFREQ 125.65 MHz  
OBSET 120.00 KHz  
OBFIN 7958.00 Hz  
POINT 32768  
FREQU 33898.30 Hz  
SCANS 15000  
AQTM 0.9667 sec  
PD 2.0333 sec  
PW1 4.40 usec  
IRNUC 1H  
CTEMP 31.4 c  
SLVNT CDCL3  
EXREF 77.00 ppm  
BF 0.09 Hz  
RGAIN 29

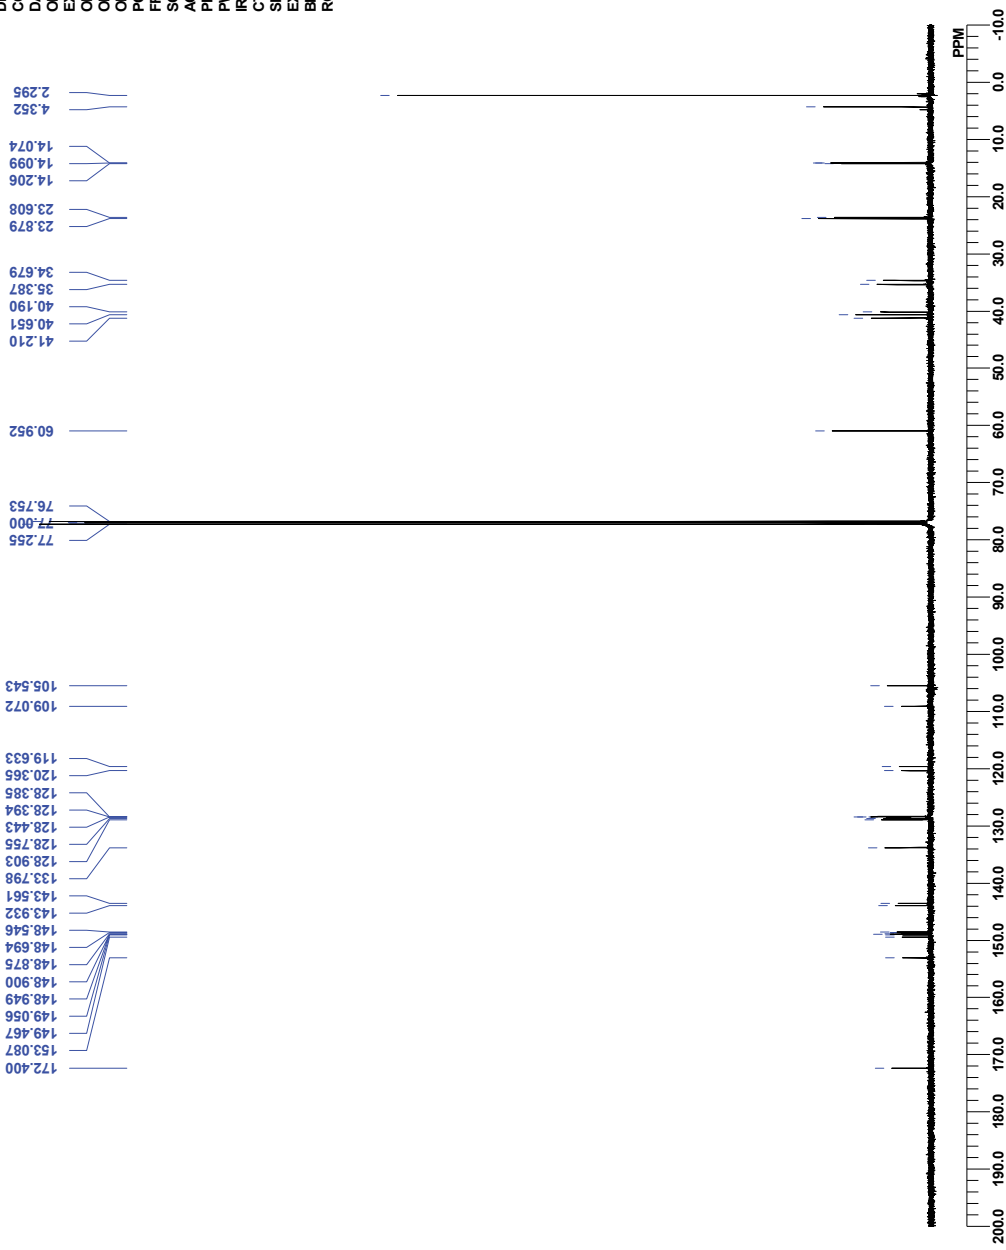

# Zn-3d

Zn-3d

F:\Poppy\rmData\_Edtk17[Zn-3d][Zn-3d]-H[Zn-3d] RT-9.32 DBP-BibtaoASmesoBr(Zn)\_E1H46-1\_J\_st.edtl\_OBC.als

DFILE [Zn-3d] RT-9.32 DBP-BibtaoASmesoBr(Zn)\_E1H46-1\_J\_st.edtl\_OBC.als  
CONV Zn-3d  
DATEIN 20190126 20:04:59  
C8NUC1H  
EXM03single\_pulse.jp  
OBSFRQ 399.78 MHz  
OBSSET 4.19 KHz  
OBSFIN 7.29 Hz  
POINT 26214  
FREQU 8000.00 Hz  
SCANS 16  
ACQTM 3.2768 sec  
PD 5.0000 sec  
PW1 3.35 usec  
IRNUC1H  
CTEMP 21.4 C  
SOLVENT CDCl3  
EXREF 7.24 ppm  
BF 0.00 Hz  
RGAIN 38

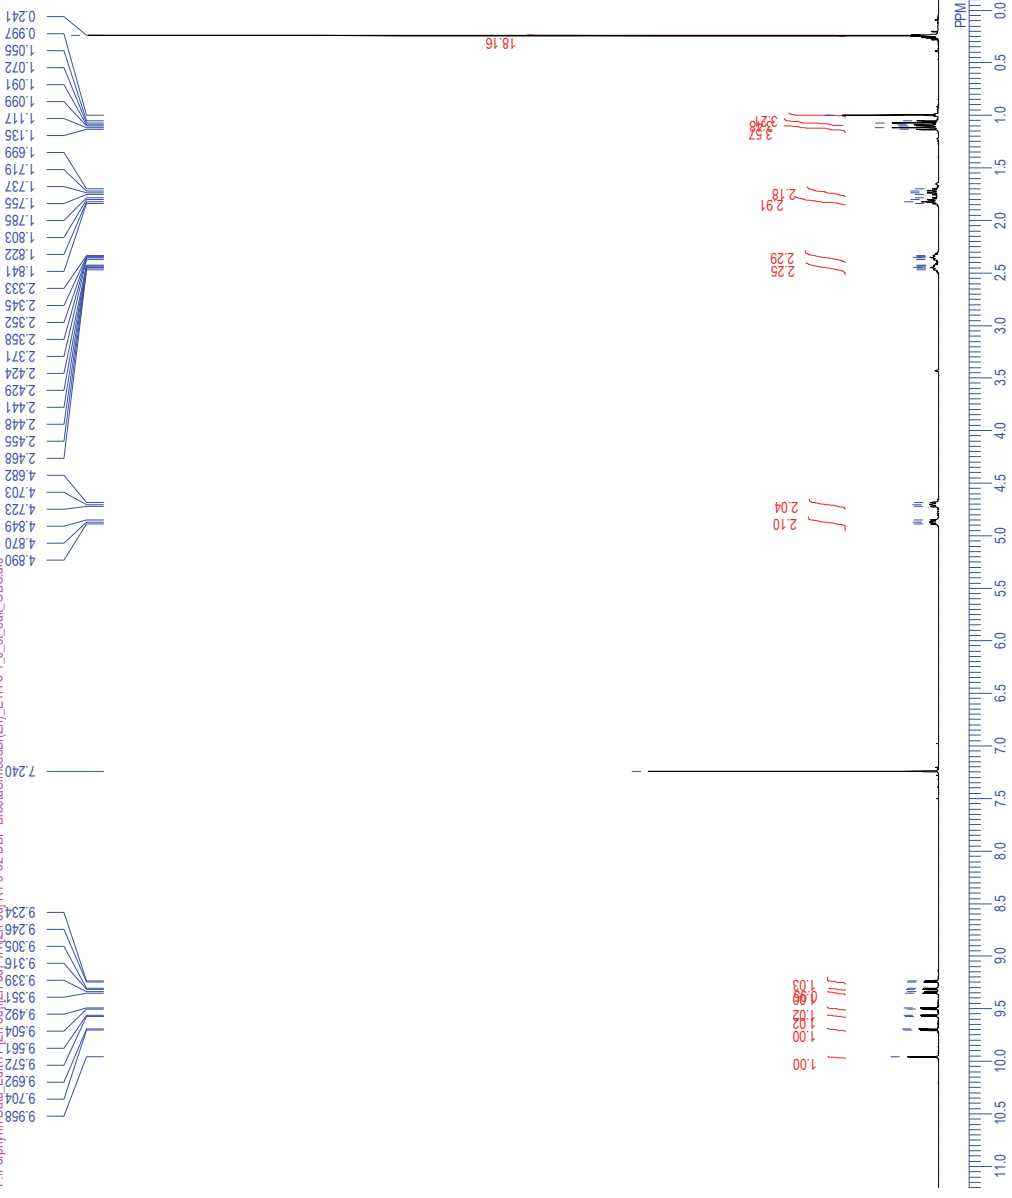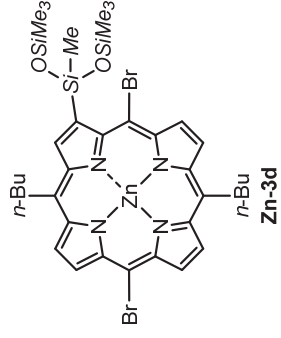



# Zn-3d

single pulse decoupled gated NOE

D:\Porphyrin-Data\17 [Zn-3d][Zn-3d]-13CIRT-9-32 DBF-BrbataSimesoBr(Zn)\_E13C-1-1-OWCE.als

DFILE RT-9-32 DBF-BrbataSimesoBr(Zn)\_E13C-1-1-OWCE  
COMINT single pulse decoupled gated NOE  
DATIM 2019-01-26 20:09:53  
CNUC 13C  
EXMOD single\_pulse\_dec  
OBFRQ 100.53 MHz  
OBSET 5.35 KHz  
OBFIN 5.86 Hz  
POINT 26214  
FREQU 25725.63 Hz  
SCANS 45600  
ACQTM 1.0433 sec  
PD 2.0000 sec  
PM1 3.60 usec  
IRNUC 1H  
CTEMP 23.0 c  
SLWT CDCL3  
EXREF 77.10 ppm  
BF 0.00 Hz  
RGAIN 60

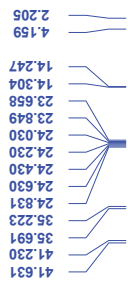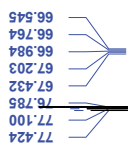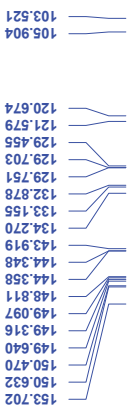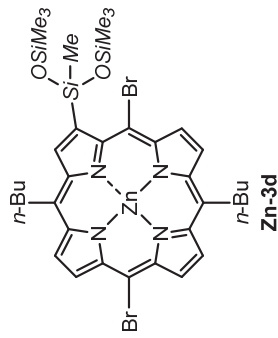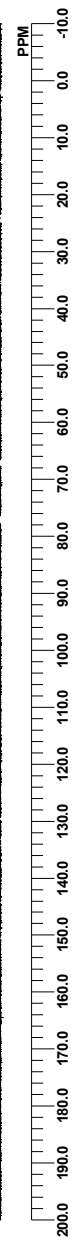

# Zn-3e

single\_pulse

F:\Porphyrin-Data\_Edith\18\Zn-3e\1H\Zn-3e-1H\Zn-3e-1H-27-13C-DPP-BceiaSimesoBr(Zn)\_E-H-2-1\_J\_st.edot\_OBC.als

DFILE [Zn-3e] RT-11-27-13C DPP-BceiaSimesoBr(Zn)\_E-H-2-1\_J\_st.edot\_O  
COMINsingle\_pulse  
DATIM 2019-01-18 16:17:31  
ORNUC1H  
EXM03single\_pulse.jpg  
OBFRQ 389.78 MHz  
OBSET 4.18 kHz  
OBFIN 7.29 Hz  
POINT 26214  
FREQU 8000.00 Hz  
SCANS 16  
ACQTM 3.2768 sec  
PD 5.0000 sec  
PWI 3.35 usec  
IRNUC1H  
CTEMP 21.4 c  
SOLVENTCDCL3  
EXREF 7.24 ppm  
BF 1.20 Hz  
RGAIN 46

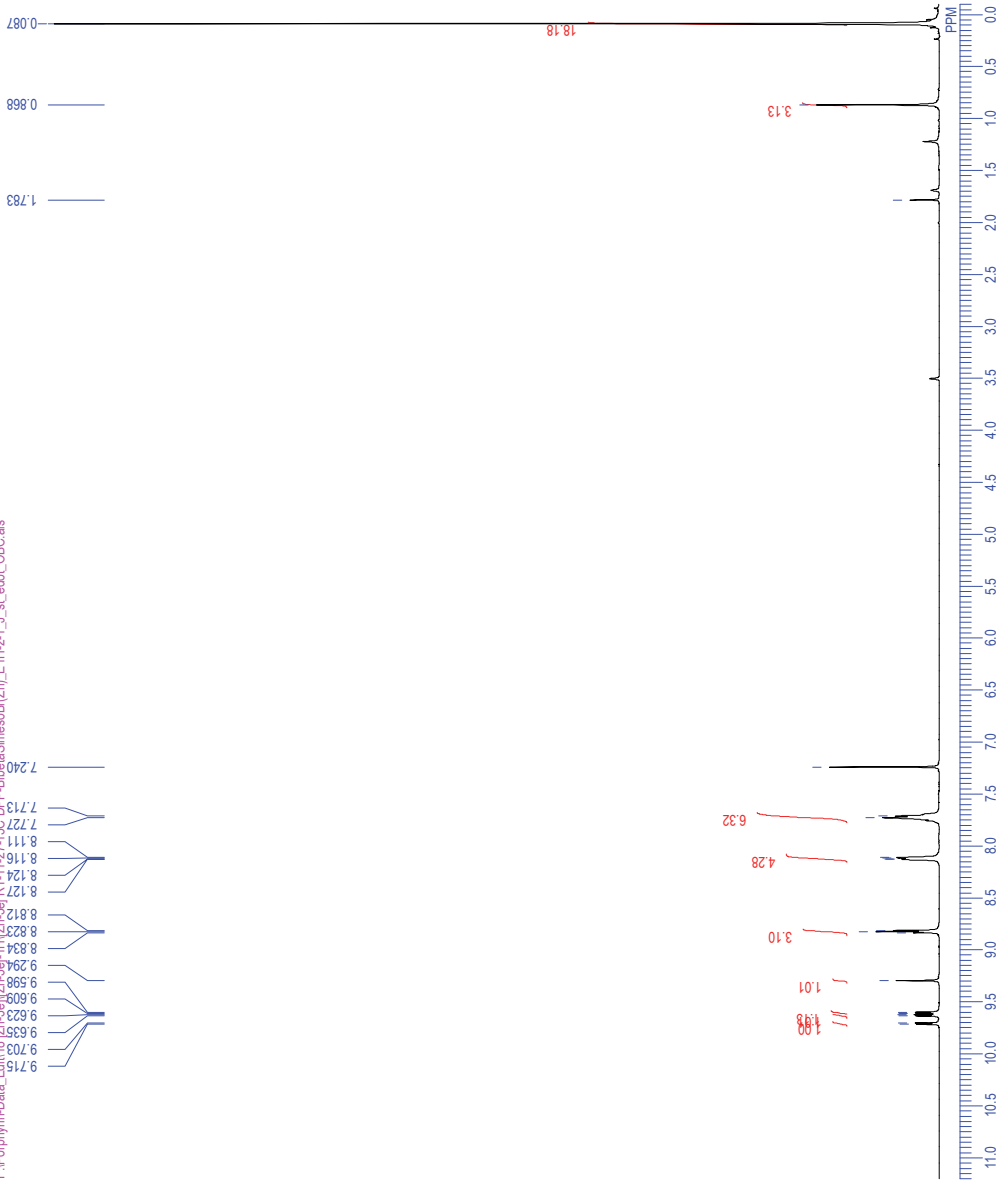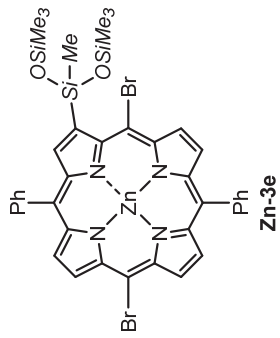

Zn-3e

single pulse decoupled gated NOE

D:\Porphyrin-Data\18 [Zn-3e]\13C\RT-11-27-13C DPP-BbetaSimesoBr(Zn)\_E13C-1-1\WCE3a.als

DFILE RT-11-27-13C DPP-BbetaSimesoBr(Zn)\_E13C-1-1\*  
 COMINT single pulse decoupled gated NOE  
 DATIM 2019-01-18 16:25:10  
 13C  
 EXMOD single\_pulse\_dec  
 OBFREQ 100.53 MHz  
 OBSSET 5.35 KHz  
 OBFIN 5.86 Hz  
 POINT 26214  
 FREQU 25125.63 Hz  
 SCANS 40000  
 ACQTM 1.0433 sec  
 PD 2.0000 sec  
 PW1 3.60 usec  
 IRNUC 1H  
 TEM 23.3 c  
 SLVNT CDCL3  
 EXREF 77.10 ppm  
 BF 1.20 Hz  
 RGAIN 60

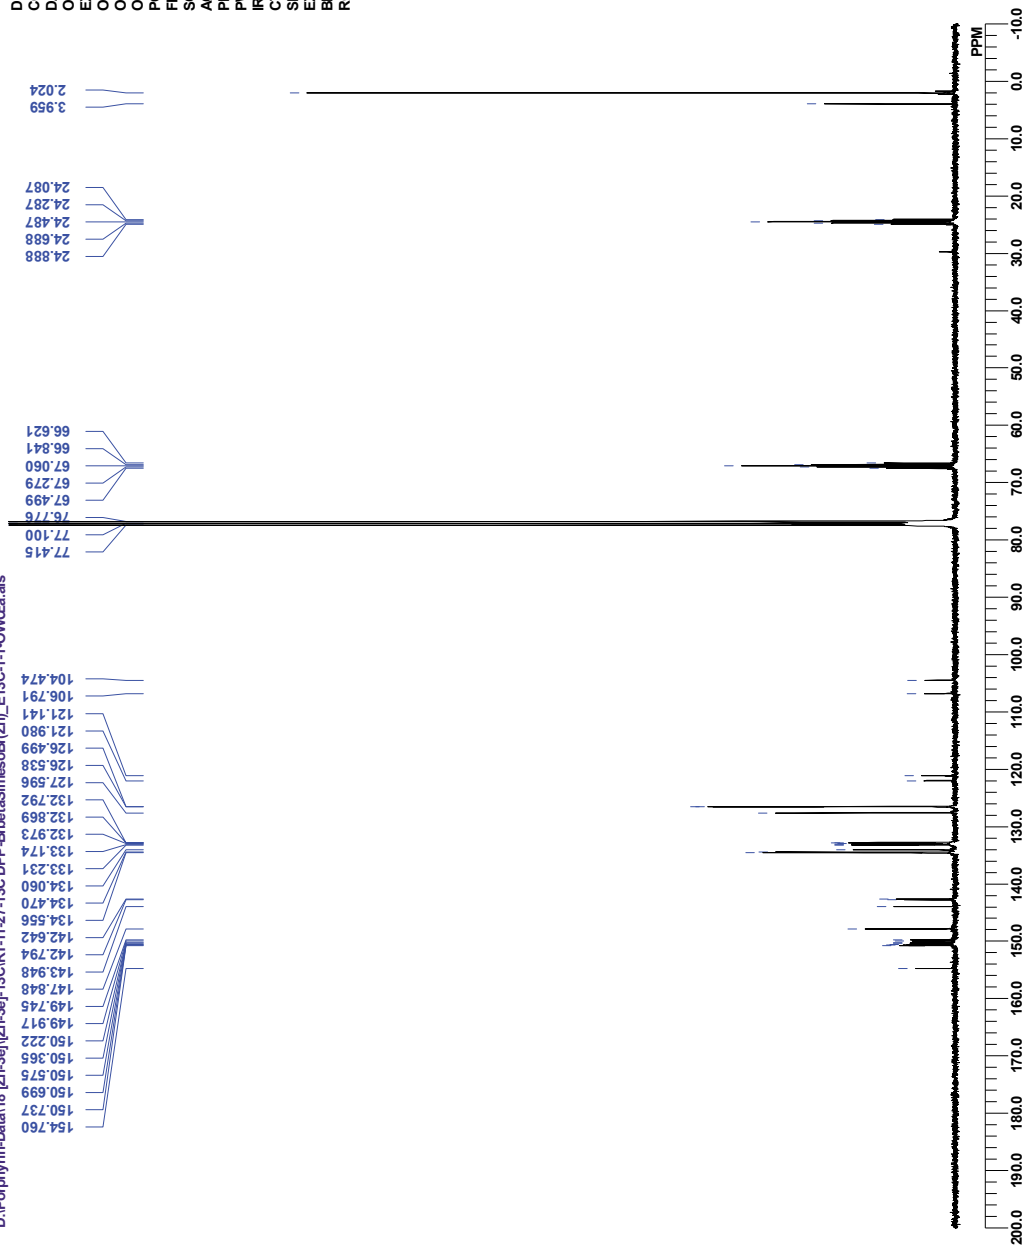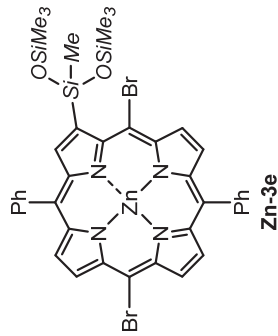

# Zn-2e

Zn-2e

F:\Porphyrin-Data\_Edit\18.5 [Zn-2e] [MNI-4-rec]Zn2e1-CDCl3-5[Zn]2e\_proton.als

DFILE Zn2e\_proton.als  
CONV Zn-2e  
DATIM 202003-11 20:58:02  
ORNUCH  
EXM03proton.jp  
OBFRQ 500.16 MHz  
OBSET 2.41 kHz  
OBFIN 6.01 Hz  
POINT 32767  
FREQU 9384.38 Hz  
SCANS 16  
ACQTM 3.4918 sec  
PD 5.0000 sec  
PWI 3.00 usec  
IRNUC1H  
CTEMP 40.0 c  
SLVNTCDCl3  
EXREF 7.24 ppm  
BF 0.30 Hz  
RGAIN 56

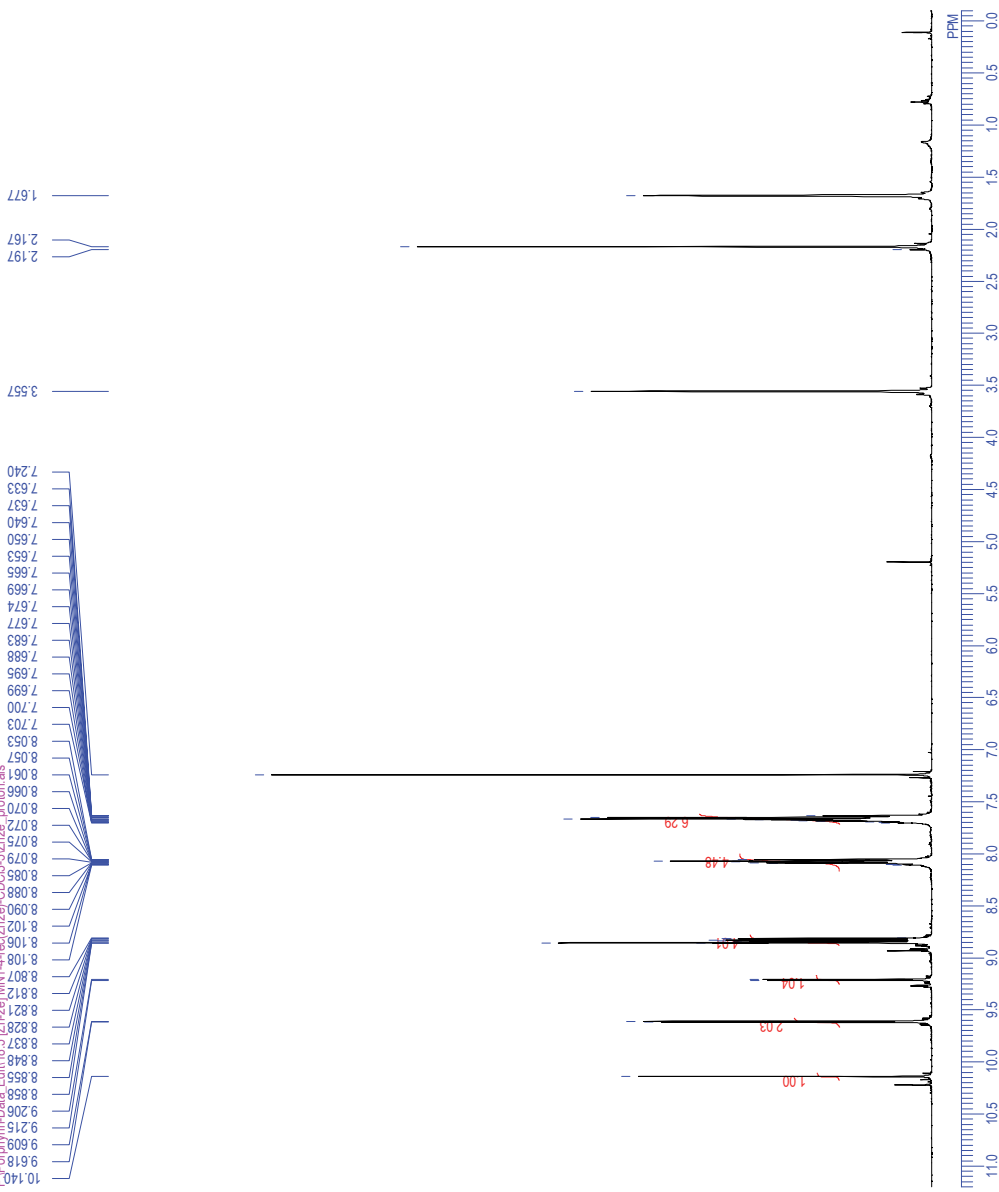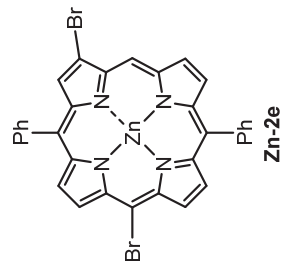

# Zn-2e

Zn-2e

F:\Porphyrin-Data\_Edith\8\_5\_2024\1114\_4sec\Zn-2e\CDCl3-5170e\_carbons.xls

DFILE Zn2e\_carbons  
 CONVZ=2e  
 DATIM2020-03-11 21:00:59  
 OBNUC=3C  
 EXMID=anon.jpg  
 OBFRQ 125.77 MHz  
 OBSET 7.87 kHz  
 OBFIN 4.21 Hz  
 POINT 32767  
 FREQU 39556.96 Hz  
 SCANS 20000  
 ACQTM 0.8284 sec  
 PD 2.0000 sec  
 PW1 3.46 usec  
 IRNUC=1H  
 CTEMP 40.0 c  
 SOLVENT=CDCl3  
 EXREF 77.00 ppm  
 BF 0.30 Hz  
 RGAIN 36

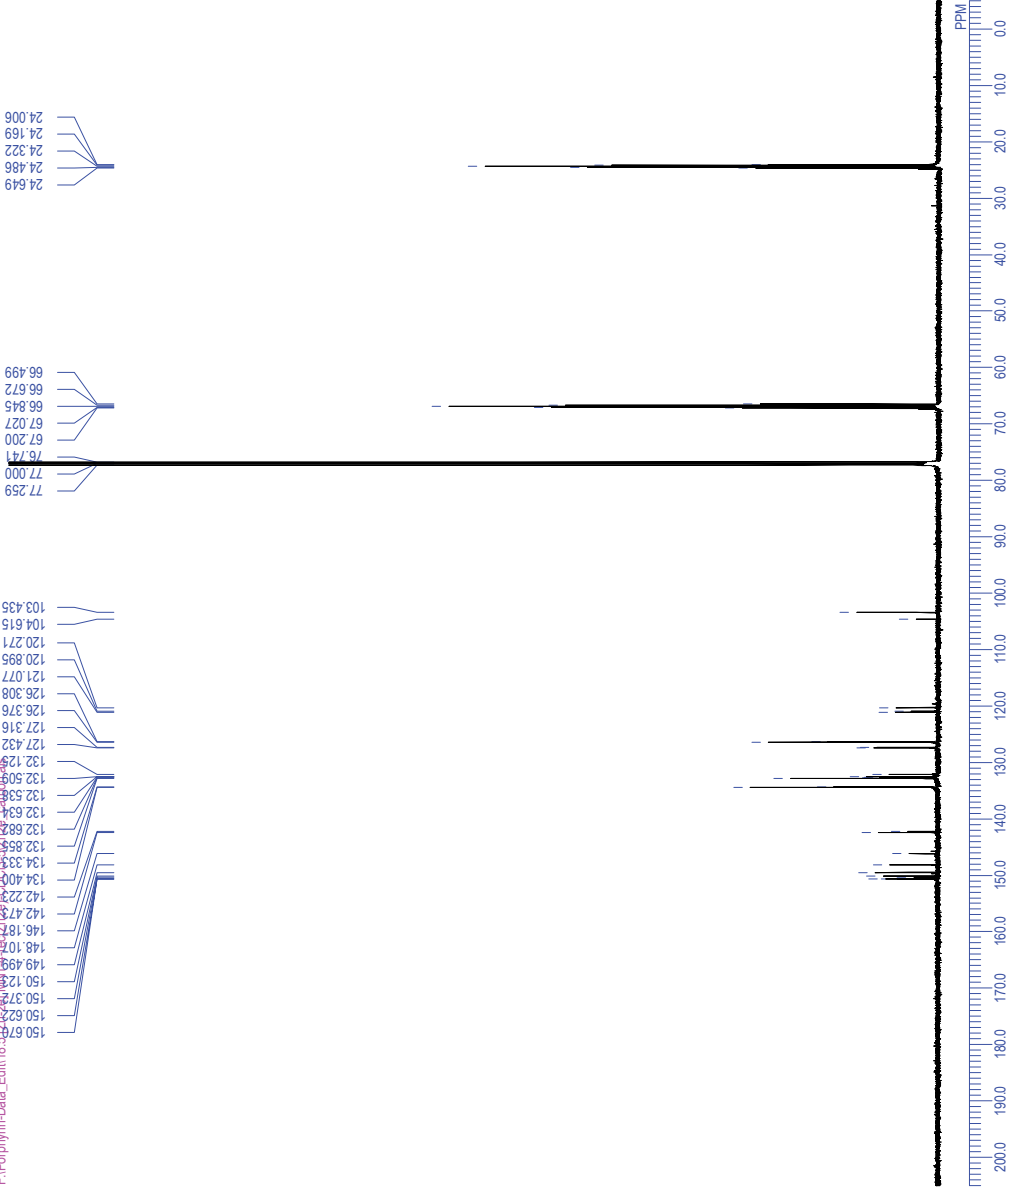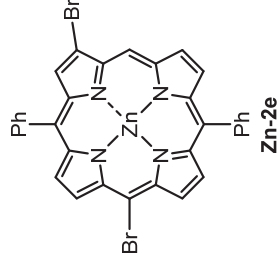

# Zn-3f

Zn-3f

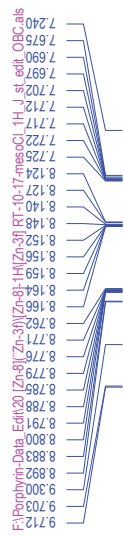

DFILE [Zn-3f]RT-10-17-mesoCl\_1H\_J\_st\_edit\_OBC.als  
CONV Zn-3f  
DATIM Wed Jan 16 01:35:25 2019  
EXM ODon  
IRNUC1H  
OBFQ 500.00 MHz  
OBSE 160.00 kHz  
OBRN 2160.00 Hz  
POINT 32766  
FREQ 10000.00 Hz  
SCANS 8  
AQTM 3.2768 sec  
PD 3.7232 sec  
PWI 5.00 usec  
IRNUC1H  
CTEMP 27.5 c  
SLVNT CDCl3  
EXREF 7.24 ppm  
BF 0.30 Hz  
RGAIN 26

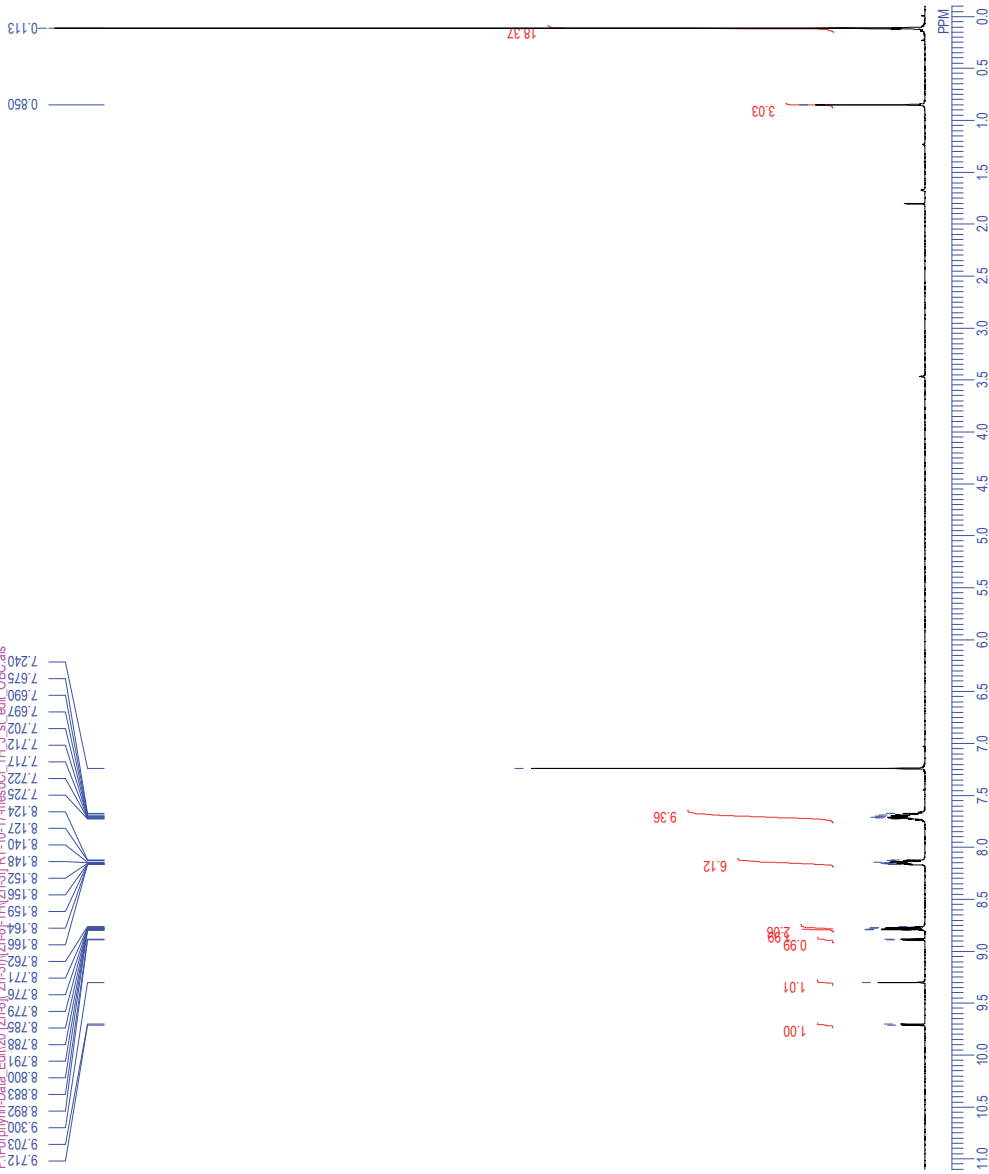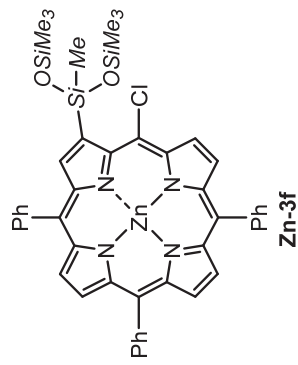

# Zn-3f

bcm

D:\Porphyrin-Data\20 [Zn-8]\Zn-8\13C\RT-10-17-TPP-betaSi-mesoCl-Zn\_13C\0WCE31.a1s

RT-10-17-TPP-betaSi-mesoCl-Zn\_13C\0WCE31.a1s  
bcm  
Thu Jan 17 12:40:33 2019  
13C  
bcm

|       |             |
|-------|-------------|
| DFILE | 125.65 MHz  |
| COMNT | 120.00 KHz  |
| DATEI | 7958.00 Hz  |
| DENUC | 32768       |
| EXMOD | 33898.30 Hz |
| OBFRQ | 42000       |
| OBSET | 0.9667 sec  |
| OBFIN | 2.0333 sec  |
| POINT | 4.90 usec   |
| FREQU | 1H          |
| SCANS | 42000       |
| ACQTM | 0.9667 sec  |
| PD    | 2.0333 sec  |
| PW1   | 4.90 usec   |
| IRNUC | 1H          |
| CTEMP | 27.5 c      |
| SLVNT | CDCL3       |
| EXREF | 77.10 ppm   |
| BF    | 0.30 Hz     |
| RGAIN | 30          |

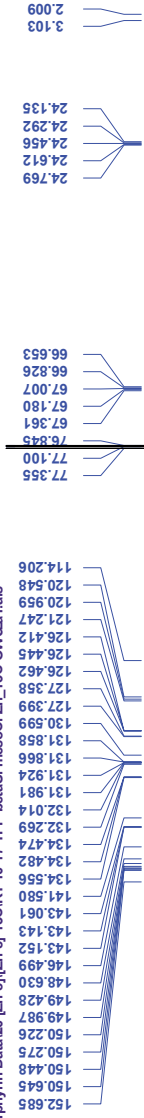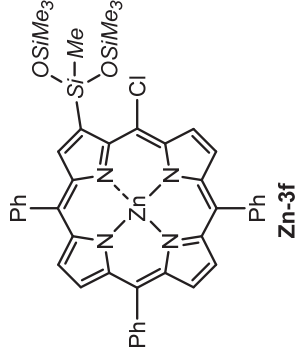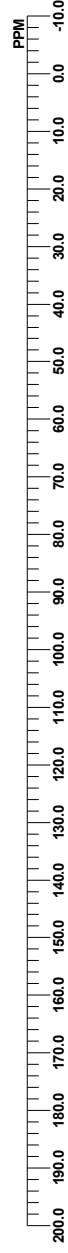

# Zn-4

C:\Users\hayashi\_satoshi\Desktop\SH-25-45-6-4\_proton-1-%\olCEA-01-pSI-p.als

DFILE SH-25-45-6-4\_proton-1-%\olCEA-01-pSI-p.als  
COMNT single\_pulse  
DATIM 2020-09-01 20:46:07  
4H  
proton\_1p  
EXMOD 500.16 MHz  
OBSFQ 2.41 KHz  
OBSFT 6.01 Hz  
OBSFN 26214  
POINT 10000.00 Hz  
FREQU 8  
SCANS 2.6214 sec  
ACQTM 5.000 sec  
PD 3.00 usec  
PWI 24.1 C  
IRNUC 1H  
CTEMP CDCL3  
SLVNT 7.24 ppm  
EXREF 0.02 Hz  
BF 56  
RGAIN

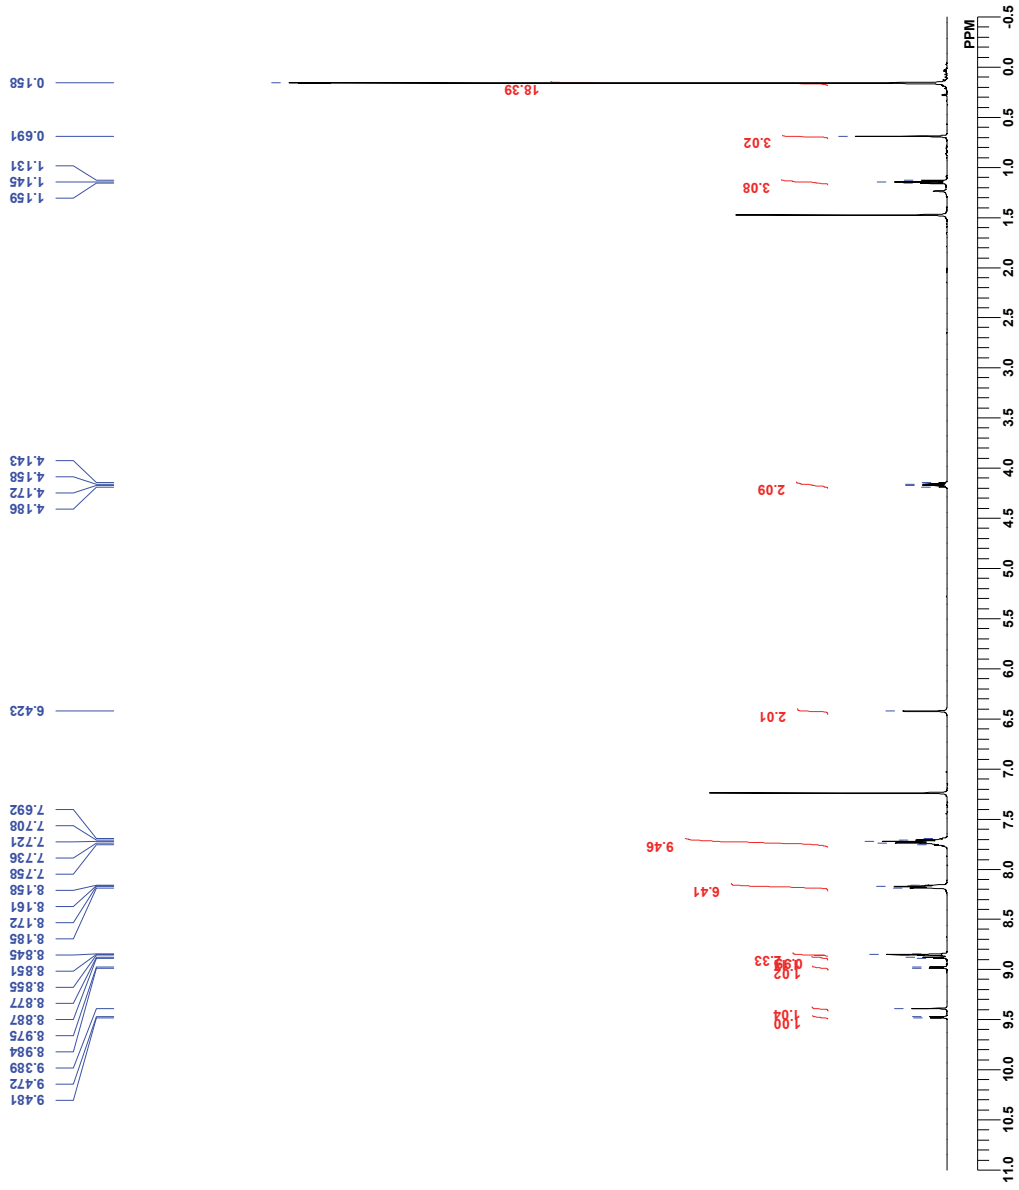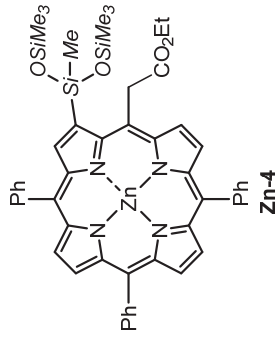



Zn-4

C:\Users\hayashi\_satoshi\Desktop\SH-25-45-6\_carbon-2-1%δ[C6H5]\_01-p\_1h-pSI-p.als

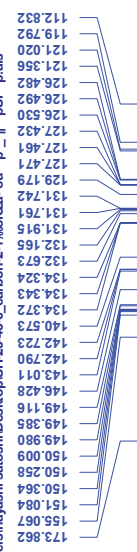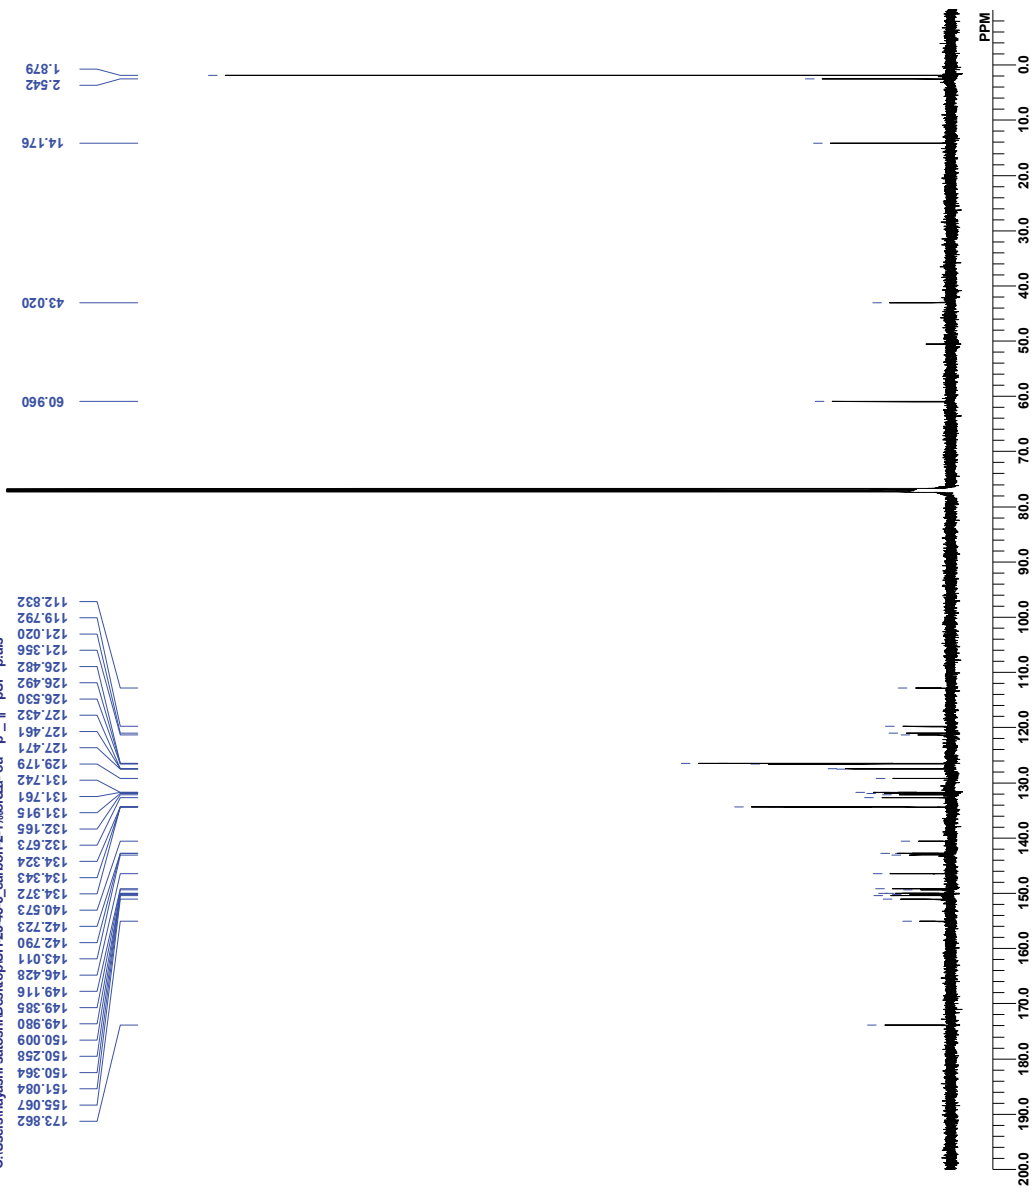

DFILE SH-25-45-6\_carbon-2-1%δ[C6H5]\_01-p\_1h-pSI-p.als  
 COMMT single pulse decoupled gated NQE  
 DATIM 2020-08-30 07:15:03  
 13C  
 EXMOD carbon jcp  
 ORNUC 125.77 MHz  
 OBSFQ 7.57 KHz  
 OBSFZ 4.21 Hz  
 POINT 26214  
 FREQU 31645.57 Hz  
 SCANS 30000  
 ACQTIM 0.6284 sec  
 PD 2.0000 sec  
 PWT 3.46 usec  
 IRNUC 1H  
 CTEMP 23.5 c  
 SLVNT CDCl3  
 EXREF 77.00 ppm  
 BF 0.02 Hz  
 RGAIN 36

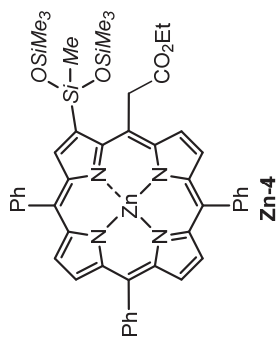

Zn-5

C:\Users\hayashi\_satoshi\Desktop\SH-25-46-3-recry2\_proton-1-%d(C2E3-6)-p2S1-p.als  
 SH-25-46-3-recry2\_proton-1-%d(C2E3-6)-p2S1-p.als  
 Single pulse  
 2020-09-03 14:30:18  
 1H  
 proton.hyp  
 EXMOD 500.16 MHz  
 OBSFREQ 2.41 KHz  
 OBSSET 6.01 Hz  
 OBSFIN 26214  
 POINT 10000.00 Hz  
 FREQU 8  
 SCANS 2.6214 sec  
 ACQTDM 5.0000 sec  
 PD 3.00 usec  
 PW1 1H 24.0 c  
 IREFNUC CDCl3  
 SLYNT 7.24 ppm  
 EXREF 0.02 Hz  
 BF 66  
 RGAIN

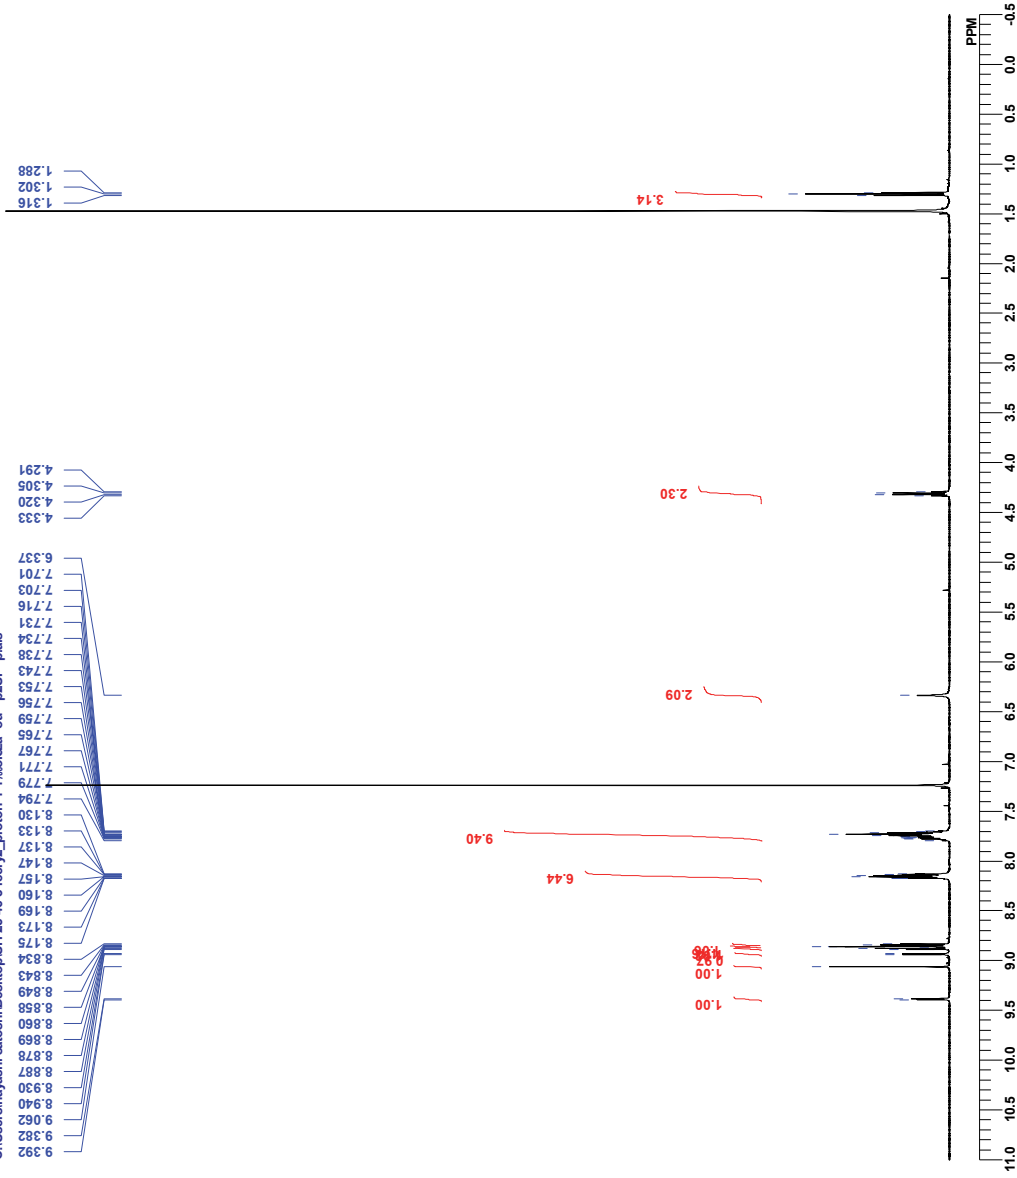

1.316  
1.302  
1.288

4.333  
4.320  
4.305  
4.291

9.392  
9.382  
9.362  
9.340  
9.330  
9.300  
9.287  
9.278  
9.269  
9.260  
9.250  
9.249  
9.243  
9.234  
9.238  
9.243  
9.253  
9.256  
9.266  
9.274  
9.279  
9.294  
9.303  
9.313  
9.333  
9.337  
9.337  
9.371  
9.373  
9.375  
9.375  
9.384  
9.384  
9.389  
9.390  
9.392

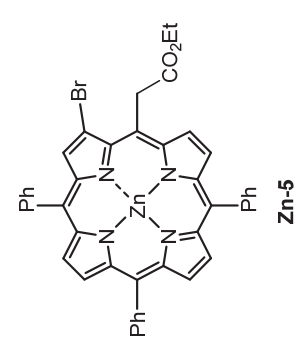

# Zn-5

C:\Users\shayashi\Desktop\SH-25-46-3-recry2\_carbon-1-1%\_dCE3-61-p-1-pSI-p.as

DFILE SH-25-46-3-recry2\_carbon-1-1%\_dCE3-61-p-1-pSI-p  
COMINT single pulse decoupled gated NOE  
DATIM 2020-09-03 14:35:12  
OBNUC 13C  
EXMOD carbon\_jpx  
OBFREQ 125.77 MHz  
OBSSET 7.87 KHz  
OBFIN 4.21 Hz  
POINT 26214  
FREQU 31645.57 Hz  
SCANS 26000  
ACQTM 0.8284 sec  
PD 2.0000 sec  
PW1 3.46 usec  
IRNUC 1H 24.2 c  
CTEMP CDCL3  
S1VNT 77.00 ppm  
EXREF 1.72 Hz  
B1F  
RGAIN 36

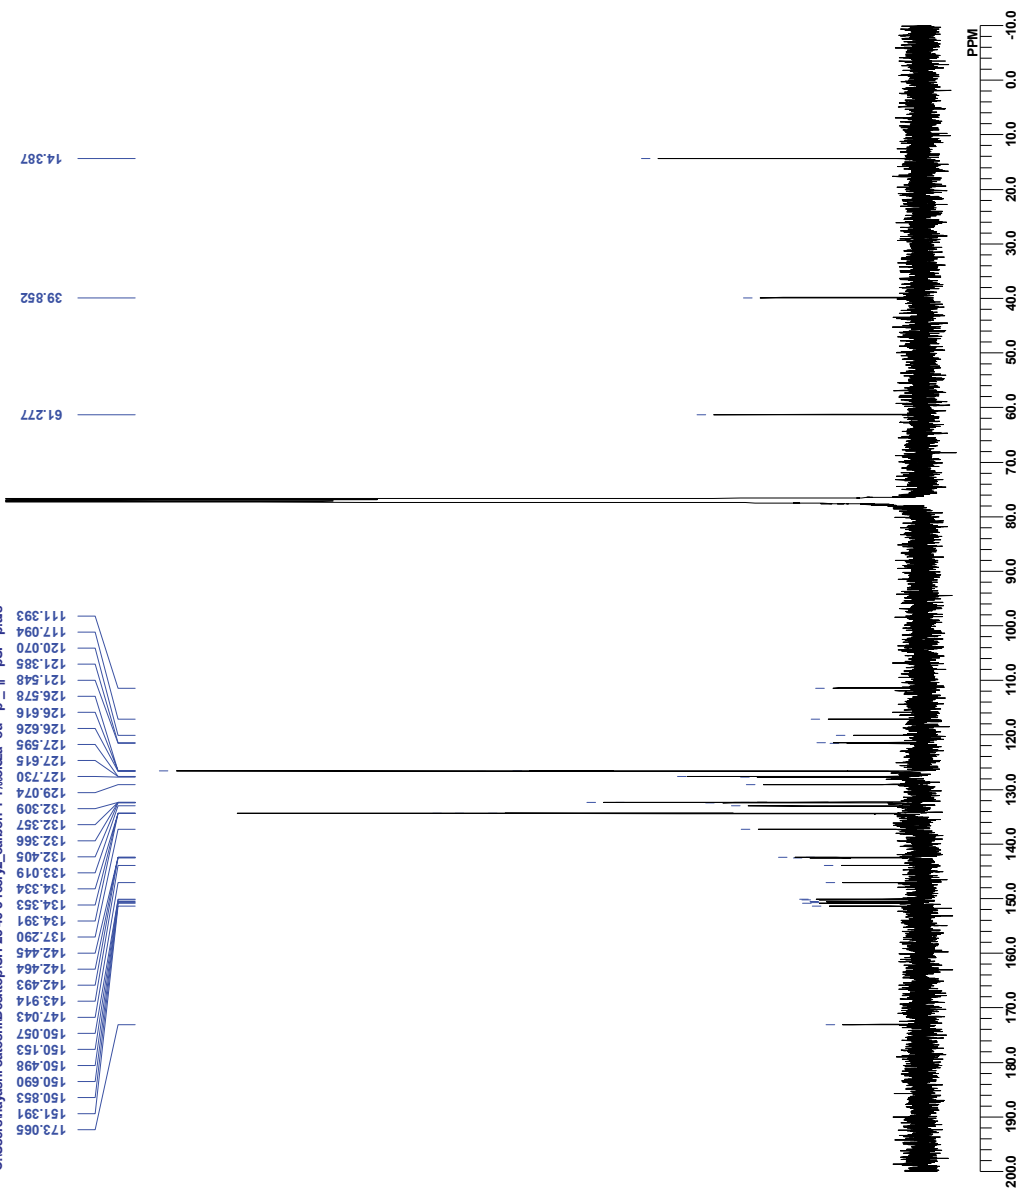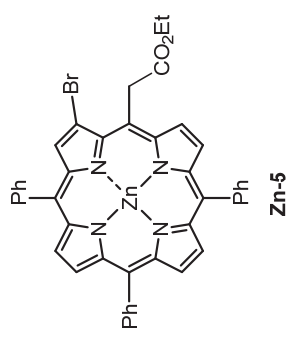

# Zn-6

## RT-10-38TBAF-TPP-mesoBr(Zn)

D:\Porphyrin-Data\19 [Zn-4][Zn-4]-HIRT-10-38TBAF-TPP-mesoBr(Zn)-OWCEB-1H.als

DFILE RT-10-38TBAF-TPP-mesoBr(Zn)-OWCEB-1H.als  
COMINT RT-10-38TBAF-TPP-mesoBr(Zn)  
DATIMI Sat Oct 27 15:09:25 2018  
1H  
OBNUC NON  
EXMOD 300.40 MHz  
OBFRQ 130.00 KHz  
OBSET 1150.00 Hz  
OBFIN 32768  
POINT 6006.01 Hz  
FREOU 16  
SCANS 5.4559 sec  
ACQTM 1.5440 sec  
PD 5.20 usec  
PW1 1H  
IRNUC 26.4 c  
CTEMP CDCL3  
SLVNT 7.24 ppm  
EXREF 0.09 Hz  
BF 20  
RGAIN

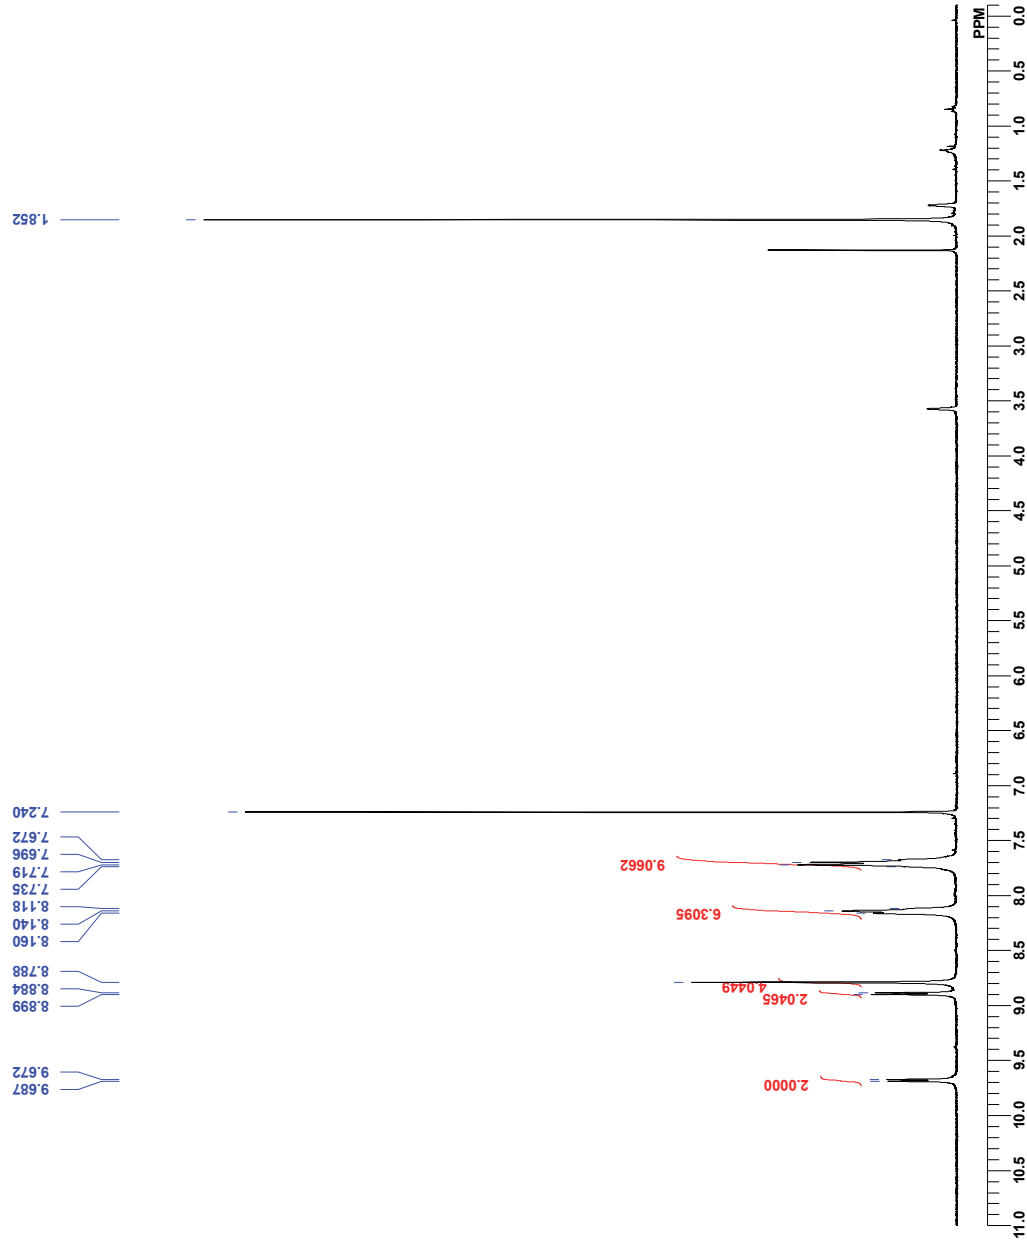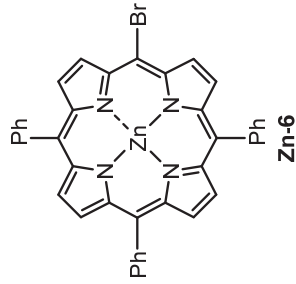

Supplement: d0ob02262d1.pdf [file d0ob02262d1.pdf]
